# Supplementary material for: Ruthenium catalyzed β-selective alkylation of vinylpyridines with aldehydes/ketones via N2H4 mediated deoxygenative couplings
Source: PubMed Central journal article supplement — Chem Sci. 2020 Dec 30;12(8):2870–5. doi: 10.1039/d0sc06586b (PMC8179402; doi:10.1039/d0sc06586b), 2020-12-30

# Supporting Information

## Ruthenium Catalyzed $\beta$ -Selective Alkylation of Vinylpyridines with Aldehydes/Ketones via $N_2H_4$ Mediated Deoxygenative Couplings

Leiyang Lv\*<sup>a</sup> and Chao-Jun Li\*<sup>b</sup>

<sup>a</sup>Department of Chemistry, Renmin University of China, Beijing 100872, China

<sup>b</sup>Department of Chemistry and FRQNT Center for Green Chemistry and Catalysis, 801 Sherbrooke Street West, McGill University, Montreal, Quebec, H3A 0B8, Canada

*E-mail:* [lvleiyang2008@ruc.edu.cn](mailto:lvleiyang2008@ruc.edu.cn)  
[cj.li@mcgill.ca](mailto:cj.li@mcgill.ca)

### Contents

|                                                                                   |     |
|-----------------------------------------------------------------------------------|-----|
| 1) General information                                                            | S2  |
| 2) General procedure and characterization data for products <b>4</b> and <b>5</b> | S2  |
| 3) Gram-scale synthesis of product <b>4aa</b>                                     | S13 |
| 4) Control experiments                                                            | S14 |
| 5) References                                                                     | S14 |
| 6) Copies of <sup>1</sup> H NMR and <sup>13</sup> C NMR spectra for all products  | S16 |

## 1. General information

$^1\text{H}$  NMR spectra were recorded on Bruker 400 or 500 MHz spectrometer and the chemical shifts were reported in parts per million ( $\delta$ ) relative to internal standard TMS (0 ppm) for  $\text{CDCl}_3$ . The peak patterns are indicated as follows: s, singlet; d, doublet; dd, doublet of doublet; t, triplet; q, quartet; m, multiplet. The coupling constants,  $J$ , are reported in Hertz (Hz).  $^1\text{H}$  NMR spectra were obtained at Bruker 400 or 500 MHz and referenced to the internal solvent signals.  $^{13}\text{C}$  NMR spectra were obtained at Bruker 100 or 125 MHz and referenced to the internal solvent signals.  $\text{CDCl}_3$  was used as the NMR solvent. APEX II (Bruker Inc.) was used for HR-MS and APCI-MS. Flash column chromatography was performed over silica gel 200-300. All other reagents were purchased from Alfa, Acros, Aldrich, TCI and used without further purification.

## 2. General procedure and characterization data for products 4 and 5

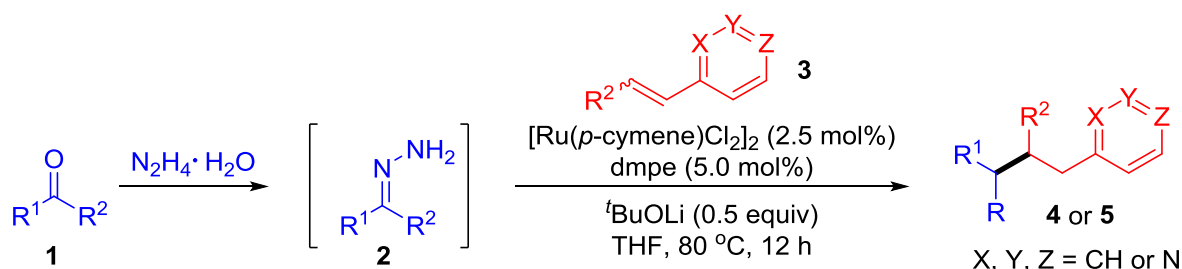

Preparation of hydrazone **2**: a mixture of aldehydes **1** (0.4 mmol, 2.0 equiv) and hydrazine monohydrate (24  $\mu\text{L}$ , 0.48 mmol, 64–65 wt%, 2.4 equiv) in THF (1.0 mL) solution was stirred for 30 min at room temperature. After that, 50 mg of anhydrous  $\text{Na}_2\text{SO}_4$  was added. The resulting mixture was filtered and the filtrate was evaporated *in vacuo* before use.

A flame-dried V-shape reaction vial (10  $\text{cm}^3$ ) equipped with a magnetic stir bar was charged with [Ru(*p*-cymene)Cl<sub>2</sub>]<sub>2</sub> (3.1 mg, 2.5 mol%). The vial was transferred to the glovebox and charged with THF (0.1 mL) and dmpe (1.8  $\mu\text{L}$ , 5.0 mol%) before being sealed with a rubber septum. The reaction mixture was stirred at room temperature for 30 min. Then vinylpyridine **3** (0.2 mmol, 1.0 equiv), hydrazone **2** (0.4 mmol, dissolved in 0.2 mL THF) and <sup>t</sup>BuOLi (0.1 mmol, 8.0 mg) was added sequentially. After that, the reaction mixture was sealed with aluminum cap, moved out of glovebox, and stirred at 80 °C for 12 hour. After the mixture was cooled to room temperature, the resulting solution was directly filtered through a pad of celite by EtOAc (3.0 mL). The crude mixture was analyzed by GC-MS. The solvent was evaporated *in vacuo* to give the crude product. NMR yield was determined by  $^1\text{H}$  NMR using mesitylene as an internal standard. The residue was purified by preparative TLC (ethyl acetate/petroleum ether) to give the pure product **4** or **5**.

**Note:** Use of the glovebox is not necessary unless to store and manipulate air-sensitive dmpe ligand. The other operations can be successfully performed outside the glovebox with standard Schlenk line procedure.

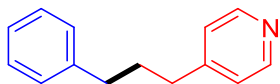

**4-(3-Phenylpropyl)pyridine (4aa).**<sup>[1]</sup> (37 mg, 95%). Isolated by preparative TLC (hexane: ethyl acetate = 3:1,  $R_f$  = 0.4);  $^1\text{H}$  NMR (500 MHz,  $\text{CDCl}_3$ )  $\delta$  8.61 (br, 2H), 7.33-7.30 (m, 2H), 7.24-7.19 (m, 5H), 2.68 (t,  $J$  = 7.8 Hz, 2H), 2.66 (t,  $J$  = 8.0 Hz, 2H), 2.03-1.97 (m, 2H);  $^{13}\text{C}$  NMR (125 MHz,  $\text{CDCl}_3$ )  $\delta$  151.4, 149.4, 141.6, 128.5, 128.4, 126.0, 124.4, 35.3, 34.7, 31.7.

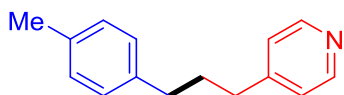

**4-(3-(*p*-Tolyl)propyl)pyridine (4ab).**<sup>[2]</sup> (41 mg, 97%). Isolated by preparative TLC (hexane: ethyl acetate = 3:1,  $R_f$  = 0.4);  $^1\text{H}$  NMR (500 MHz,  $\text{CDCl}_3$ )  $\delta$  8.52 (br, 2H), 7.14-7.12 (m, 4H), 7.09 (d,  $J$  = 8.0 Hz, 2H), 2.65 (t,  $J$  = 7.6 Hz, 2H), 2.64 (t,  $J$  = 7.6 Hz, 2H), 2.35 (s, 3H), 2.01-1.95 (m, 2H);  $^{13}\text{C}$  NMR (125 MHz,  $\text{CDCl}_3$ )  $\delta$  151.2, 149.7, 138.5, 135.4, 129.1, 128.3, 123.9, 34.8, 34.6, 31.9, 21.0.

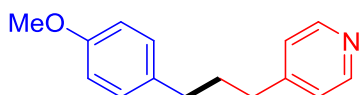

**4-(3-(4-Methoxyphenyl)propyl)pyridine (4ac).**<sup>[3]</sup> (43 mg, 95%). Isolated by preparative TLC (hexane: ethyl acetate = 3:1,  $R_f$  = 0.4);  $^1\text{H}$  NMR (500 MHz,  $\text{CDCl}_3$ )  $\delta$  8.51 (br, 2H), 7.13 (br, 2H), 7.11 (d,  $J$  = 8.6 Hz, 2H), 6.86 (d,  $J$  = 8.6 Hz, 2H), 3.81 (s, 3H), 2.64 (t,  $J$  = 7.6 Hz, 2H), 2.62 (t,  $J$  = 7.6 Hz, 2H), 1.99-1.92 (m, 2H);  $^{13}\text{C}$  NMR (125 MHz,  $\text{CDCl}_3$ )  $\delta$  157.9, 151.3, 149.7, 133.7, 129.3, 123.9, 113.8, 55.3, 34.6, 34.4, 32.0.

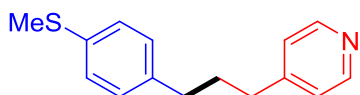

**4-(3-(4-(Methylthio)phenyl)propyl)pyridine (4ad).** (44 mg, 92%). Isolated by preparative TLC (hexane: ethyl acetate = 3:1,  $R_f$  = 0.4);  $^1\text{H}$  NMR (500 MHz,  $\text{CDCl}_3$ )  $\delta$  8.51 (br, 2H), 7.22 (d,  $J$  = 8.4 Hz, 2H), 7.12 (br, 2H), 7.11 (d,  $J$  = 8.4 Hz, 2H), 2.64-2.61 (m, 4H), 2.49 (s, 3H), 1.99-1.93 (m, 2H);  $^{13}\text{C}$  NMR (125 MHz,  $\text{CDCl}_3$ )  $\delta$  151.1, 149.7, 138.7, 135.6, 129.0, 127.2, 123.9, 34.7, 34.6, 31.7, 16.3; HRMS (ESI) calcd for  $\text{C}_{15}\text{H}_{18}\text{NS}$  [ $\text{M} + \text{H}^+$ ], 244.1154; found: 244.1154.

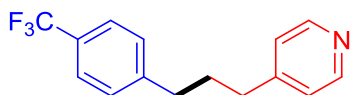

**4-(3-(4-(Trifluoromethyl)phenyl)propyl)pyridine (4ae).** (51 mg, 97%). Isolated by preparative TLC (hexane: ethyl acetate = 3:1,  $R_f$  = 0.4);  $^1\text{H}$  NMR (500 MHz,  $\text{CDCl}_3$ )  $\delta$  8.54 (br, 2H), 7.56 (d,  $J$  = 8.2 Hz, 2H), 7.29 (d,  $J$  = 8.2 Hz, 2H), 7.13 (br, 2H), 2.72 (t,  $J$  = 7.8 Hz, 2H), 2.66 (t,  $J$  = 7.8 Hz, 2H), 2.03-1.97 (m, 2H);  $^{13}\text{C}$  NMR (125 MHz,

CDCl<sub>3</sub>)  $\delta$  150.8, 149.7, 145.7, 128.7, 128.4 (q,  $J_{C-F}$  = 32.3 Hz), 125.4 (q,  $J_{C-F}$  = 3.9 Hz), 124.3 (q,  $J_{C-F}$  = 272.4 Hz), 124.0, 35.0, 34.5, 31.4; <sup>19</sup>F NMR (470 MHz, CDCl<sub>3</sub>)  $\delta$  -62.3; HRMS (ESI) calcd for C<sub>15</sub>H<sub>15</sub>F<sub>3</sub>N [M + H<sup>+</sup>], 266.1151; found: 266.1148.

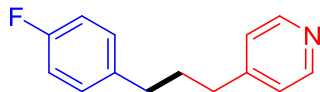

**4-(3-(4-Fluorophenyl)propyl)pyridine (4af).**<sup>[2]</sup> (42 mg, 97%). Isolated by preparative TLC (hexane: ethyl acetate = 3:1, R<sub>f</sub> = 0.4); <sup>1</sup>H NMR (500 MHz, CDCl<sub>3</sub>)  $\delta$  8.52 (br, 2H), 7.15-7.11 (m, 4H), 7.01-6.96 (m, 2H), 2.64 (t,  $J$  = 7.8 Hz, 4H), 1.99-1.93 (m, 2H); <sup>13</sup>C NMR (125 MHz, CDCl<sub>3</sub>)  $\delta$  161.3 (d,  $J_{C-F}$  = 243.8 Hz), 151.0, 149.8, 137.2 (d,  $J_{C-F}$  = 2.9 Hz), 129.7 (d,  $J_{C-F}$  = 8.0 Hz), 123.9, 115.2 (d,  $J_{C-F}$  = 21.2 Hz), 34.5, 34.4, 31.9; <sup>19</sup>F NMR (376 MHz, CDCl<sub>3</sub>)  $\delta$  -117.5.

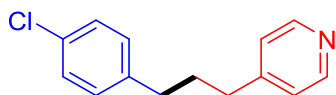

**4-(3-(4-Chlorophenyl)propyl)pyridine (4ag).**<sup>[4]</sup> (44 mg, 96%). Isolated by preparative TLC (hexane: ethyl acetate = 3:1, R<sub>f</sub> = 0.4); <sup>1</sup>H NMR (500 MHz, CDCl<sub>3</sub>)  $\delta$  8.54 (br, 2H), 7.28-7.26 (m, 2H), 7.13-7.10 (m, 4H), 2.65-2.62 (m, 4H), 1.99-1.93 (m, 2H); <sup>13</sup>C NMR (125 MHz, CDCl<sub>3</sub>)  $\delta$  151.1, 149.6, 140.0, 131.7, 129.7, 128.5, 124.0, 34.6, 34.5, 31.6.

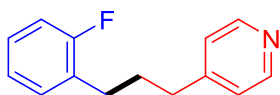

**4-(3-(2-Fluorophenyl)propyl)pyridine (4ah).** (42 mg, 98%). Isolated by preparative TLC (hexane: ethyl acetate = 3:1, R<sub>f</sub> = 0.4); <sup>1</sup>H NMR (500 MHz, CDCl<sub>3</sub>)  $\delta$  8.51 (br, 2H), 7.22-7.17 (m, 2H), 7.13 (d,  $J$  = 5.4 Hz, 2H), 7.08 (dt,  $J$  = 7.4, 1.0 Hz, 1H), 7.03 (dt,  $J$  = 8.2, 1.0 Hz, 1H), 2.71 (t,  $J$  = 7.6 Hz, 2H), 2.67 (t,  $J$  = 7.8 Hz, 2H), 2.00-1.95 (m, 2H); <sup>13</sup>C NMR (125 MHz, CDCl<sub>3</sub>)  $\delta$  161.1 (d,  $J_{C-F}$  = 244.0 Hz), 151.0, 149.7, 130.6 (d,  $J_{C-F}$  = 5.4 Hz), 128.4 (d,  $J_{C-F}$  = 15.8 Hz), 127.8 (d,  $J_{C-F}$  = 8.2 Hz), 124.0 (d,  $J_{C-F}$  = 3.4 Hz), 123.9, 115.3 (d,  $J_{C-F}$  = 22.2 Hz), 34.7, 30.5, 28.6 (d,  $J_{C-F}$  = 2.0 Hz); <sup>19</sup>F NMR (376 MHz, CDCl<sub>3</sub>)  $\delta$  -118.8; HRMS (ESI) calcd for C<sub>14</sub>H<sub>15</sub>FN [M + H<sup>+</sup>], 216.1183; found: 216.1183.

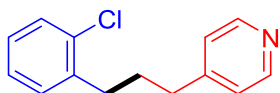

**4-(3-(2-Chlorophenyl)propyl)pyridine (4ai).**<sup>[4]</sup> (45 mg, 97%). Isolated by preparative TLC (hexane: ethyl acetate = 3:1, R<sub>f</sub> = 0.4); <sup>1</sup>H NMR (500 MHz, CDCl<sub>3</sub>)  $\delta$  8.54 (br, 2H), 7.36-7.35 (m, 1H), 7.21-7.19 (m, 2H), 7.18-7.14 (m, 3H), 2.79 (t,  $J$  = 7.8 Hz, 2H), 2.70 (t,  $J$  = 7.8 Hz, 2H), 2.02-1.96 (m, 2H); <sup>13</sup>C NMR (125 MHz, CDCl<sub>3</sub>)  $\delta$  151.1,

149.6, 139.2, 133.9, 130.4, 129.6, 127.5, 126.8, 124.0, 34.8, 33.1, 30.1.

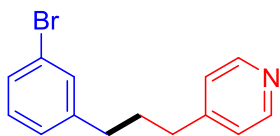

**4-(3-(3-Bromophenyl)propyl)pyridine (4aj).** (53 mg, 97%). Isolated by preparative TLC (hexane: ethyl acetate = 3:1,  $R_f = 0.4$ );  $^1\text{H NMR}$  (500 MHz,  $\text{CDCl}_3$ )  $\delta$  8.55 (br, 2H), 7.35-7.33 (m, 2H), 7.18-7.09 (m, 4H), 2.66-2.61 (m, 4H), 2.00-1.94 (m, 2H);  $^{13}\text{C NMR}$  (125 MHz,  $\text{CDCl}_3$ )  $\delta$  151.1, 149.5, 143.9, 131.5, 130.0, 129.2, 127.1, 124.1, 122.5, 34.9, 34.6, 31.5; HRMS (ESI) calcd for  $\text{C}_{14}\text{H}_{15}\text{BrN}$  [ $\text{M} + \text{H}^+$ ], 276.0382; found: 276.0374.

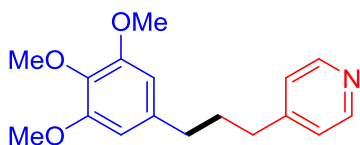

**4-(3-(3,4,5-Trimethoxyphenyl)propyl)pyridine (4ak).** (57 mg, 99%). Isolated by preparative TLC (hexane: ethyl acetate = 2:1,  $R_f = 0.5$ );  $^1\text{H NMR}$  (500 MHz,  $\text{CDCl}_3$ )  $\delta$  8.51 (br, 2H), 7.13 (br, 2H), 6.39 (s, 2H), 3.85 (s, 6H), 3.84 (s, 3H), 2.66 (t,  $J = 7.6$  Hz, 2H), 2.61 (t,  $J = 7.6$  Hz, 2H), 2.00-1.94 (m, 2H);  $^{13}\text{C NMR}$  (125 MHz,  $\text{CDCl}_3$ )  $\delta$  153.2, 151.0, 149.7, 137.4, 136.2, 123.9, 105.3, 60.9, 56.1, 35.7, 34.7, 31.8; HRMS (APCI) calcd for  $\text{C}_{17}\text{H}_{22}\text{NO}_3$  [ $\text{M} + \text{H}^+$ ], 288.1594; found: 288.1592.

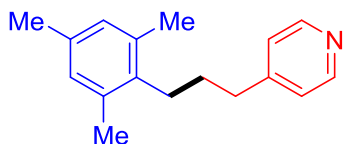

**4-(3-(3-Mesityl)propyl)pyridine (4al).** (26 mg, 54%). Isolated by preparative TLC (hexane: ethyl acetate = 3:1,  $R_f = 0.4$ );  $^1\text{H NMR}$  (500 MHz,  $\text{CDCl}_3$ )  $\delta$  8.59 (br, 2H), 7.20 (br, 2H), 6.85 (s, 2H), 2.76 (t,  $J = 7.6$  Hz, 2H), 2.64-2.61 (m, 2H), 2.27 (s, 3H), 2.25 (s, 6H), 1.85-1.79 (m, 2H);  $^{13}\text{C NMR}$  (125 MHz,  $\text{CDCl}_3$ )  $\delta$  151.2, 149.7, 135.8, 135.5, 135.2, 129.0, 124.1, 35.6, 29.6, 28.8, 20.8, 19.7; HRMS (ESI) calcd for  $\text{C}_{17}\text{H}_{22}\text{N}$  [ $\text{M} + \text{H}^+$ ], 240.1747; found: 240.1737.

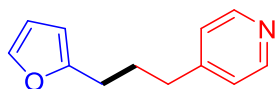

**4-(3-(Furan-2-yl)propyl)pyridine (4am).** (33 mg, 87%). Isolated by preparative TLC (hexane: ethyl acetate = 3:1,  $R_f = 0.4$ );  $^1\text{H NMR}$  (500 MHz,  $\text{CDCl}_3$ )  $\delta$  8.51 (d,  $J = 5.8$  Hz, 2H), 7.33 (d,  $J = 1.4$  Hz, 1H), 7.12 (d,  $J = 5.8$  Hz, 2H), 6.30 (dd,  $J = 3.0, 1.4$  Hz, 1H), 6.01 (d,  $J = 3.0$  Hz, 1H), 2.69-2.64 (m, 4H), 2.03-1.97 (m, 2H);  $^{13}\text{C NMR}$  (125 MHz,  $\text{CDCl}_3$ )  $\delta$  155.3, 150.8, 149.7, 141.0, 123.9, 110.1, 105.2, 34.4, 28.6, 27.3; HRMS (ESI) calcd for  $\text{C}_{12}\text{H}_{14}\text{NO}$  [ $\text{M} + \text{H}^+$ ], 188.1070; found: 188.1067.

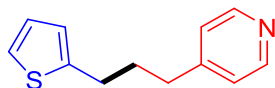

**4-(3-(Thiophen-2-yl)propyl)pyridine (4an).** (28 mg, 69%). Isolated by preparative TLC (hexane: ethyl acetate = 3:1,  $R_f = 0.4$ );  $^1\text{H}$  NMR (500 MHz,  $\text{CDCl}_3$ )  $\delta$  8.52 (d,  $J = 5.8$  Hz, 2H), 7.16 (dd,  $J = 5.2, 1.2$  Hz, 1H), 7.14 (d,  $J = 5.8$  Hz, 2H), 6.95 (dd,  $J = 5.2, 3.4$  Hz, 1H), 6.82 (dq,  $J = 3.4, 1.2$  Hz, 1H), 2.89 (t,  $J = 7.6$  Hz, 2H), 2.69 (t,  $J = 7.6$  Hz, 2H), 2.08-2.02 (m, 2H);  $^{13}\text{C}$  NMR (125 MHz,  $\text{CDCl}_3$ )  $\delta$  150.8, 149.8, 144.4, 126.8, 124.4, 123.9, 123.2, 34.3, 32.1, 29.2; HRMS (ESI) calcd for  $\text{C}_{12}\text{H}_{14}\text{NS}$  [ $\text{M} + \text{H}^+$ ], 204.0841; found: 204.0838.

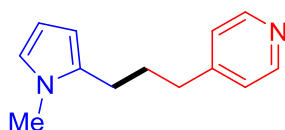

**4-(3-(Thiophen-2-yl)propyl)pyridine (4ao).** (36 mg, 91%). Isolated by preparative TLC (hexane: ethyl acetate = 3:1,  $R_f = 0.4$ );  $^1\text{H}$  NMR (500 MHz,  $\text{CDCl}_3$ )  $\delta$  8.53 (br, 2H), 7.16 (d,  $J = 5.8$  Hz, 2H), 6.58 (t,  $J = 2.2$  Hz, 1H), 6.09 (t,  $J = 3.0$  Hz, 1H), 5.94-5.93 (m, 1H), 3.52 (s, 3H), 2.74 (t,  $J = 7.6$  Hz, 2H), 2.60 (t,  $J = 7.6$  Hz, 2H), 2.04-1.98 (m, 2H);  $^{13}\text{C}$  NMR (125 MHz,  $\text{CDCl}_3$ )  $\delta$  151.0, 149.8, 132.4, 123.9, 121.3, 106.6, 105.7, 34.7, 33.5, 29.1, 25.6; HRMS (ESI) calcd for  $\text{C}_{13}\text{H}_{17}\text{N}_2$  [ $\text{M} + \text{H}^+$ ], 201.1386; found: 201.1391.

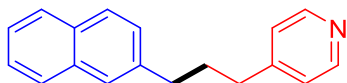

**4-(3-(Naphthalen-2-yl)propyl)pyridine (4ap).** (49 mg, 99%). Isolated by preparative TLC (hexane: ethyl acetate = 3:1,  $R_f = 0.4$ );  $^1\text{H}$  NMR (500 MHz,  $\text{CDCl}_3$ )  $\delta$  8.54 (br, 2H), 7.85 (d,  $J = 7.8$  Hz, 1H), 7.82 (d,  $J = 8.2$  Hz, 2H), 7.64 (s, 1H), 7.50 (dt,  $J = 6.8, 1.2$  Hz, 1H), 7.46 (dt,  $J = 6.8, 1.2$  Hz, 1H), 7.35 (dd,  $J = 8.4, 1.6$  Hz, 1H), 7.14 (d,  $J = 5.6$  Hz, 2H), 2.85 (t,  $J = 7.6$  Hz, 2H), 2.69 (t,  $J = 7.8$  Hz, 2H), 2.12-2.06 (m, 2H);  $^{13}\text{C}$  NMR (125 MHz,  $\text{CDCl}_3$ )  $\delta$  151.1, 149.8, 139.1, 133.6, 132.1, 128.1, 127.7, 127.4, 127.2, 126.6, 126.0, 125.3, 124.0, 35.4, 34.6, 31.6; HRMS (ESI) calcd for  $\text{C}_{18}\text{H}_{18}\text{N}$  [ $\text{M} + \text{H}^+$ ], 248.1434; found: 248.1433.

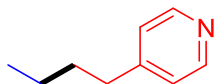

**4-Butylpyridine (4aq).**<sup>[5]</sup> (22 mg, 82%). Isolated by preparative TLC (hexane: ethyl acetate = 5:1,  $R_f = 0.5$ );  $^1\text{H}$  NMR (500 MHz,  $\text{CDCl}_3$ )  $\delta$  8.53 (br, 2H), 7.13 (br, 2H), 2.61 (t,  $J = 7.8$  Hz, 2H), 1.65-1.59 (m, 2H), 1.40-1.33 (m, 2H), 0.94 (t,  $J = 7.4$  Hz, 3H);  $^{13}\text{C}$  NMR (125 MHz,  $\text{CDCl}_3$ )  $\delta$  151.7, 149.5, 124.1, 34.9, 32.4, 22.2, 13.8.

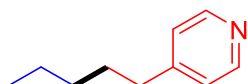

**4-Pentylpyridine (4ar).**<sup>[5]</sup> (23 mg, 78%). Isolated by preparative TLC (hexane: ethyl acetate = 5:1,  $R_f = 0.5$ );  $^1\text{H}$  NMR (500 MHz,  $\text{CDCl}_3$ )  $\delta$  8.54 (br, 2H), 7.13 (br, 2H), 2.60 (t,  $J = 7.8$  Hz, 2H), 1.67-1.61 (m, 2H), 1.37-1.28 (m, 4H), 0.91 (t,  $J = 6.8$  Hz, 3H);  $^{13}\text{C}$  NMR (125 MHz,  $\text{CDCl}_3$ )  $\delta$  151.7, 149.5, 124.1, 35.2, 31.3, 30.0, 22.4, 13.9.

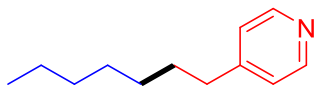

**4-Heptylpyridine (4as).** (29 mg, 83%).<sup>[6]</sup> Isolated by preparative TLC (hexane: ethyl acetate = 5:1,  $R_f = 0.5$ );  $^1\text{H}$  NMR (500 MHz,  $\text{CDCl}_3$ )  $\delta$  8.55 (br, 2H), 7.14 (br, 2H), 2.60 (t,  $J = 7.8$  Hz, 2H), 1.65-1.62 (m, 2H), 1.33-1.28 (m, 8H), 0.89 (t,  $J = 7.0$  Hz, 3H);  $^{13}\text{C}$  NMR (125 MHz,  $\text{CDCl}_3$ )  $\delta$  151.9, 149.4, 124.2, 35.3, 31.7, 30.3, 29.1, 29.0, 22.6, 14.1.

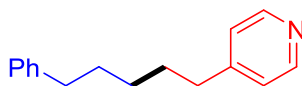

**4-(5-Phenylpentyl)pyridine (4at).**<sup>[4]</sup> (39 mg, 87%). Isolated by preparative TLC (hexane: ethyl acetate = 3:1,  $R_f = 0.4$ );  $^1\text{H}$  NMR (500 MHz,  $\text{CDCl}_3$ )  $\delta$  8.52 (br, 2H), 7.32-7.29 (m, 2H), 7.22-7.18 (m, 3H), 7.12 (br, 2H), 2.65-2.60 (m, 4H), 1.71-1.65 (m, 4H), 1.44-1.38 (m, 2H);  $^{13}\text{C}$  NMR (125 MHz,  $\text{CDCl}_3$ )  $\delta$  151.7, 149.5, 142.5, 128.4, 128.3, 125.7, 124.0, 35.8, 35.2, 31.2, 30.2, 28.8.

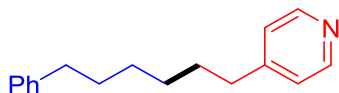

**4-(6-Phenylhexyl)pyridine (4au).**<sup>[4]</sup> (45 mg, 95%). Isolated by preparative TLC (hexane: ethyl acetate = 3:1,  $R_f = 0.4$ );  $^1\text{H}$  NMR (500 MHz,  $\text{CDCl}_3$ )  $\delta$  8.50 (br, 2H), 7.33-7.30 (m, 2H), 7.23-7.18 (m, 3H), 7.08 (br, 2H), 2.73-2.66 (m, 1H), 2.61-2.52 (m, 2H), 1.69-1.55 (m, 4H), 1.37-1.19 (m, 5H);  $^{13}\text{C}$  NMR (125 MHz,  $\text{CDCl}_3$ )  $\delta$  151.6, 149.6, 147.5, 128.3, 127.0, 125.9, 124.0, 39.9, 38.1, 35.1, 30.3, 27.2, 22.3.

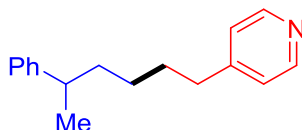

**4-(5-Phenylhexyl)pyridine (4av).** (40 mg, 84%). Isolated by preparative TLC (hexane: ethyl acetate = 3:1,  $R_f = 0.4$ );  $^1\text{H}$  NMR (400 MHz,  $\text{CDCl}_3$ )  $\delta$  8.49 (br, 2H), 7.33-7.30 (m, 2H), 7.23-7.18 (m, 3H), 7.07 (d,  $J = 5.8$  Hz, 2H), 2.73-2.66 (m, 1H), 2.62-2.53 (m, 2H), 1.67-1.55 (m, 4H), 1.34-1.20 (m, 5H);  $^{13}\text{C}$  NMR (100 MHz,  $\text{CDCl}_3$ )  $\delta$  151.6, 149.6, 147.5, 128.3, 127.0, 125.9, 123.9, 39.9, 38.1, 35.1, 30.3, 27.2, 22.3; HRMS (ESI) calcd for  $\text{C}_{17}\text{H}_{22}\text{N}$  [ $\text{M} + \text{H}^+$ ], 240.1747; found: 240.1749.

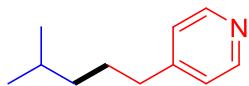

**4-(4-Methylpentyl)pyridine (4aw).**<sup>[7]</sup> (25 mg, 76%). Isolated by preparative TLC (hexane: ethyl acetate = 5:1,  $R_f$  = 0.5);  $^1\text{H}$  NMR (500 MHz,  $\text{CDCl}_3$ )  $\delta$  8.55 (br, 2H), 7.15 (br, 2H), 2.60 (t,  $J$  = 7.8 Hz, 2H), 1.68-1.61 (m, 2H), 1.60-1.54 (m, 1H), 1.26-1.21 (m, 2H), 0.89 (d,  $J$  = 6.6 Hz, 6H);  $^{13}\text{C}$  NMR (125 MHz,  $\text{CDCl}_3$ )  $\delta$  152.1, 149.3, 124.2, 38.4, 35.5, 28.1, 27.8, 22.5.

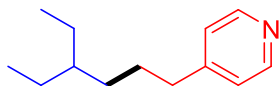

**4-(4-Ethylhexyl)pyridine (4ax).** (29 mg, 77%). Isolated by preparative TLC (hexane: ethyl acetate = 5:1,  $R_f$  = 0.5);  $^1\text{H}$  NMR (500 MHz,  $\text{CDCl}_3$ )  $\delta$  8.54 (br, 2H), 7.14 (br, 2H), 2.60 (t,  $J$  = 7.8 Hz, 2H), 1.65-1.59 (m, 2H), 1.31-1.27 (m, 7H), 0.84 (t,  $J$  = 7.4 Hz, 6H);  $^{13}\text{C}$  NMR (125 MHz,  $\text{CDCl}_3$ )  $\delta$  151.8, 149.5, 124.1, 40.2, 35.7, 32.3, 27.5, 25.3, 10.9; HRMS (ESI) calcd for  $\text{C}_{13}\text{H}_{22}\text{N}$  [ $\text{M} + \text{H}^+$ ], 192.1747; found: 192.1744.

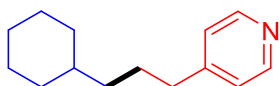

**4-(3-Cyclohexylpropyl)pyridine (4ay).**<sup>[8]</sup> (32 mg, 79%). Isolated by preparative TLC (hexane: ethyl acetate = 5:1,  $R_f$  = 0.5);  $^1\text{H}$  NMR (500 MHz,  $\text{CDCl}_3$ )  $\delta$  8.55 (br, 2H), 7.13 (br, 2H), 2.59 (t,  $J$  = 7.8 Hz, 2H), 1.71-1.61 (m, 7H), 1.27-1.12 (m, 6H), 0.91-0.85 (m, 2H);  $^{13}\text{C}$  NMR (125 MHz,  $\text{CDCl}_3$ )  $\delta$  152.0, 149.4, 124.1, 37.5, 37.0, 35.6, 33.3, 27.6, 26.7, 26.4.

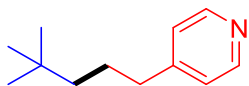

**4-(4,4-Dimethylpentyl)pyridine (4az).**<sup>[9]</sup> (27 mg, 75%). Isolated by preparative TLC (hexane: ethyl acetate = 5:1,  $R_f$  = 0.5);  $^1\text{H}$  NMR (500 MHz,  $\text{CDCl}_3$ )  $\delta$  8.52 (br, 2H), 7.13 (d,  $J$  = 5.2 Hz, 2H), 2.59 (t,  $J$  = 7.6 Hz, 2H), 1.65-1.58 (m, 2H), 1.25-1.21 (m, 2H), 0.89 (s, 9H);  $^{13}\text{C}$  NMR (125 MHz,  $\text{CDCl}_3$ )  $\delta$  151.7, 149.6, 124.0, 43.7, 36.1, 30.3, 29.3, 25.5.

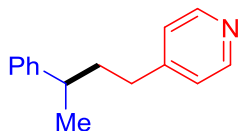

**4-(3-Phenylbutyl)pyridine (4ba).**<sup>[4]</sup> (33 mg, 78%). Isolated by preparative TLC (hexane: ethyl acetate = 5:1,  $R_f$  = 0.5);  $^1\text{H}$  NMR (500 MHz,  $\text{CDCl}_3$ )  $\delta$  8.52 (br, 2H), 7.36-7.32 (m, 2H), 7.26-7.20 (m, 3H), 7.09 (br, 2H), 2.78-2.69 (m, 1H), 2.58-2.46 (m, 2H), 1.98-1.91 (m, 2H), 1.31 (d,  $J$  = 7.0 Hz, 3H);  $^{13}\text{C}$  NMR (125 MHz,  $\text{CDCl}_3$ )  $\delta$  151.6,



149.5, 146.6, 128.5, 127.0, 126.2, 124.0, 39.5, 38.7, 33.3, 22.5.

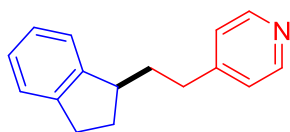

**4-(2-(2,3-Dihydro-1H-inden-1-yl)ethyl)pyridine (4bb).** (43 mg, 96%). Isolated by preparative TLC (hexane: ethyl acetate = 3:1,  $R_f = 0.3$ );  $^1\text{H}$  NMR (500 MHz,  $\text{CDCl}_3$ )  $\delta$  8.53 (br, 2H), 7.27-7.25 (m, 1H), 7.24-7.17 (m, 5H), 3.21-3.15 (m, 1H), 3.02-2.96 (m, 1H), 2.92-2.86 (m, 1H), 2.81-2.69 (m, 2H), 2.41-2.34 (m, 1H), 2.24-2.17 (m, 1H), 1.83-1.74 (m, 2H);  $^{13}\text{C}$  NMR (125 MHz,  $\text{CDCl}_3$ )  $\delta$  151.4, 149.8, 146.7, 144.0, 126.6, 126.2, 124.6, 123.9, 123.5, 44.4, 35.6, 33.2, 32.0, 31.4; HRMS (ESI) calcd for  $\text{C}_{16}\text{H}_{18}\text{N}$  [ $\text{M} + \text{H}^+$ ], 224.1434; found: 224.1433.

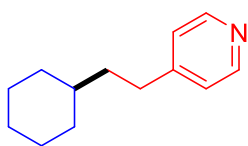

**4-(2-Cyclohexylethyl)pyridine (4bc).**<sup>[10]</sup> (32 mg, 86%). Isolated by preparative TLC (hexane: ethyl acetate = 5:1,  $R_f = 0.5$ );  $^1\text{H}$  NMR (500 MHz,  $\text{CDCl}_3$ )  $\delta$  8.57 (br, 2H), 7.15 (br, 2H), 2.62 (t,  $J = 8.0$  Hz, 2H), 1.78-1.67 (m, 5H), 1.55-1.51 (m, 2H), 1.31-1.16 (m, 4H), 0.99-0.92 (m, 2H),  $^{13}\text{C}$  NMR (125 MHz,  $\text{CDCl}_3$ )  $\delta$  152.1, 149.5, 124.1, 38.1, 37.2, 33.2, 32.6, 26.6, 26.3.

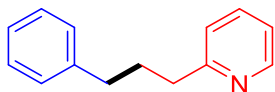

**2-(3-Phenylpropyl)pyridine (5a).**<sup>[11]</sup> (38 mg, 96%). Isolated by preparative TLC (hexane: ethyl acetate = 3:1,  $R_f = 0.4$ );  $^1\text{H}$  NMR (500 MHz,  $\text{CDCl}_3$ )  $\delta$  8.56 (d,  $J = 4.2$  Hz, 1H), 7.60 (dt,  $J = 7.6, 1.8$  Hz, 1H), 7.32-7.29 (m, 2H), 7.23-7.19 (m, 3H), 7.16 (d,  $J = 7.6$  Hz, 1H), 7.13-7.11 (m, 1H), 2.86 (t,  $J = 7.8$  Hz, 2H), 2.72 (t,  $J = 7.8$  Hz, 2H), 2.14-2.07 (m, 2H);  $^{13}\text{C}$  NMR (125 MHz,  $\text{CDCl}_3$ )  $\delta$  162.0, 149.3, 142.2, 136.3, 128.5, 128.3, 125.8, 122.8, 121.0, 37.9, 35.6, 31.5.

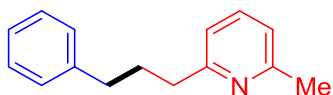

**2-Methyl-6-(3-phenylpropyl)pyridine (5b).**<sup>[11]</sup> (40 mg, 96%). Isolated by preparative TLC (hexane: ethyl acetate = 10:1,  $R_f = 0.4$ );  $^1\text{H}$  NMR (500 MHz,  $\text{CDCl}_3$ )  $\delta$  7.49 (t,  $J = 7.6$  Hz, 1H), 7.32-7.29 (m, 2H), 7.23-7.18 (m, 3H), 6.98 (d,  $J = 7.6$  Hz, 1H), 6.96 (d,  $J = 7.6$  Hz, 1H), 2.83 (t,  $J = 7.6$  Hz, 2H), 2.72 (t,  $J = 7.6$  Hz, 2H), 2.56 (s, 3H), 2.11-2.04 (m, 2H);  $^{13}\text{C}$  NMR (125 MHz,  $\text{CDCl}_3$ )  $\delta$  161.4, 157.8, 142.3, 136.5, 128.5, 128.3, 125.7, 120.5, 119.5, 38.1, 35.7, 31.8, 24.6.

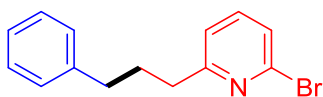

**2-Bromo-6-(3-phenylpropyl)pyridine (5c).** (48 mg, 88%). Isolated by preparative TLC (hexane: ethyl acetate = 10:1,  $R_f = 0.5$ );  $^1\text{H NMR}$  (500 MHz,  $\text{CDCl}_3$ )  $\delta$  7.45 (t,  $J = 7.6$  Hz, 1H), 7.33-7.28 (m, 3H), 7.27-7.20 (m, 3H), 7.10 (d,  $J = 7.6$  Hz, 1H), 2.83 (t,  $J = 7.6$  Hz, 2H), 2.71 (t,  $J = 7.8$  Hz, 2H), 2.11-2.05 (m, 2H);  $^{13}\text{C NMR}$  (125 MHz,  $\text{CDCl}_3$ )  $\delta$  163.7, 141.9, 141.6, 138.6, 128.5, 128.4, 125.9, 125.3, 121.6, 37.5, 35.5, 31.3; HRMS (ESI) calcd for  $\text{C}_{14}\text{H}_{15}\text{BrN}$  [ $\text{M} + \text{H}^+$ ], 276.0382; found: 276.0374.

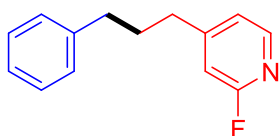

**2-Fluoro-4-(3-phenylpropyl)pyridine (5d).**<sup>[11]</sup> (40 mg, 92%). Isolated by preparative TLC (hexane: ethyl acetate = 10:1,  $R_f = 0.5$ );  $^1\text{H NMR}$  (500 MHz,  $\text{CDCl}_3$ )  $\delta$  8.12 (d,  $J = 5.2$  Hz, 1H), 7.34-7.31 (m, 2H), 7.25-7.22 (m, 1H), 7.21-7.19 (m, 2H), 7.02 (d,  $J = 5.2$  Hz, 1H), 6.76 (s, 1H), 2.71-2.68 (m, 4H), 2.04-1.98 (m, 2H);  $^{13}\text{C NMR}$  (125 MHz,  $\text{CDCl}_3$ )  $\delta$  164.1 (d,  $J_{\text{C-F}} = 237.4$  Hz), 157.3 (d,  $J_{\text{C-F}} = 7.5$  Hz), 147.3 (d,  $J_{\text{C-F}} = 15.2$  Hz), 141.3, 128.5, 128.4, 126.1, 121.6 (d,  $J_{\text{C-F}} = 4.0$  Hz), 109.1 (d,  $J_{\text{C-F}} = 36.7$  Hz), 35.2, 34.5 (d,  $J_{\text{C-F}} = 2.9$  Hz), 31.6;  $^{19}\text{F NMR}$  (470 MHz,  $\text{CDCl}_3$ )  $\delta$  -69.1.

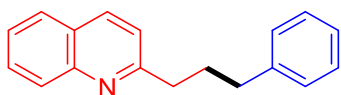

**2-(3-Phenylpropyl)quinoline (5f).**<sup>[12]</sup> (48 mg, 97%). Isolated by preparative TLC (hexane: ethyl acetate = 3:1,  $R_f = 0.5$ );  $^1\text{H NMR}$  (500 MHz,  $\text{CDCl}_3$ )  $\delta$  8.09 (d,  $J = 8.4$  Hz, 1H), 8.08 (d,  $J = 8.2$  Hz, 1H), 7.80 (d,  $J = 8.2$  Hz, 1H), 7.72 (dt,  $J = 7.6, 1.4$  Hz, 1H), 7.51 (dt,  $J = 7.6, 1.0$  Hz, 1H), 7.35-7.30 (m, 3H), 7.26-7.21 (m, 3H), 3.06 (t,  $J = 7.8$  Hz, 2H), 2.78 (t,  $J = 7.8$  Hz, 2H), 2.24-2.17 (m, 2H);  $^{13}\text{C NMR}$  (125 MHz,  $\text{CDCl}_3$ )  $\delta$  162.5, 148.0, 142.1, 136.3, 129.4, 128.9, 128.5, 128.4, 127.5, 126.8, 125.8, 125.7, 121.4, 38.8, 35.7, 31.6.

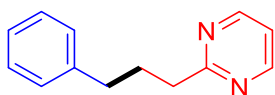

**2-(3-phenylpropyl)pyrimidine (5g).**<sup>[11]</sup> (37 mg, 94%). Isolated by preparative TLC (hexane: ethyl acetate = 3:1,  $R_f = 0.4$ );  $^1\text{H NMR}$  (500 MHz,  $\text{CDCl}_3$ )  $\delta$  8.69 (d,  $J = 4.8$  Hz, 2H), 7.31-7.28 (m, 2H), 7.24-7.23 (m, 2H), 7.21-7.18 (m, 1H), 7.14 (t,  $J = 4.8$  Hz, 1H), 3.03 (t,  $J = 7.8$  Hz, 2H), 2.74 (t,  $J = 7.6$  Hz, 2H), 2.22-2.16 (m, 2H);  $^{13}\text{C NMR}$  (125 MHz,  $\text{CDCl}_3$ )  $\delta$  171.3, 157.0, 142.0, 128.5, 128.3, 125.8, 118.5, 39.1, 35.6, 30.3.

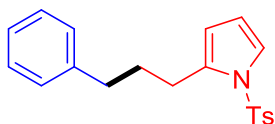

**2-(3-Phenylpropyl)-1-tosyl-1H-pyrrole (5h).** (49 mg, 72%). Isolated by preparative TLC (hexane: ethyl acetate = 10:1,  $R_f = 0.5$ );  $^1\text{H}$  NMR (500 MHz,  $\text{CDCl}_3$ )  $\delta$  7.61 (d,  $J = 8.4$  Hz, 2H), 7.32-7.29 (m, 3H), 7.26 (d,  $J = 8.4$  Hz, 2H), 7.24-7.21 (m, 1H), 7.18-7.16 (m, 2H), 2.71 (t,  $J = 7.8$  Hz, 2H), 2.67 (t,  $J = 7.6$  Hz, 2H), 2.42 (s, 3H), 1.93-1.87 (m, 2H);  $^{13}\text{C}$  NMR (125 MHz,  $\text{CDCl}_3$ )  $\delta$  144.7, 141.9, 136.4, 135.4, 130.0, 128.5, 128.3, 126.8, 125.8, 122.2, 118.8, 111.2, 35.4, 30.2, 26.7, 21.6; HRMS (ESI) calcd for  $\text{C}_{20}\text{H}_{22}\text{NO}_2\text{S}$  [ $\text{M} + \text{H}^+$ ], 340.1366; found: 340.1365.

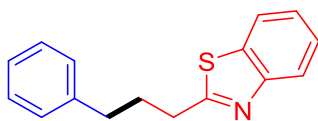

**2-(3-Phenylpropyl)benzo[d]thiazole (5i).** (38 mg, 76%). Isolated by preparative TLC (hexane: ethyl acetate = 5:1,  $R_f = 0.5$ );  $^1\text{H}$  NMR (500 MHz,  $\text{CDCl}_3$ )  $\delta$  8.01 (d,  $J = 8.2$  Hz, 1H), 7.87 (d,  $J = 8.0$  Hz, 1H), 7.48 (td,  $J = 7.8, 1.2$  Hz, 1H), 7.38 (td,  $J = 7.8, 1.2$  Hz, 1H), 7.34-7.31 (m, 2H), 7.26-7.22 (m, 3H), 3.17 (t,  $J = 7.8$  Hz, 2H), 2.80 (t,  $J = 7.8$  Hz, 2H), 2.29-2.23 (m, 2H);  $^{13}\text{C}$  NMR (125 MHz,  $\text{CDCl}_3$ )  $\delta$  171.8, 153.3, 141.3, 135.2, 128.5, 128.4, 126.1, 126.0, 124.7, 122.6, 121.5, 35.2, 33.7, 31.2; HRMS (ESI) calcd for  $\text{C}_{16}\text{H}_{16}\text{NS}$  [ $\text{M} + \text{H}^+$ ], 254.0998; found: 254.1996.

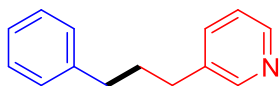

**3-(3-Phenylpropyl)pyridine (5j).**<sup>[1]</sup> (37 mg, 94%). Isolated by preparative TLC (hexane: ethyl acetate = 3:1,  $R_f = 0.4$ );  $^1\text{H}$  NMR (500 MHz,  $\text{CDCl}_3$ )  $\delta$  8.49 (br, 2H), 7.51 (dt,  $J = 7.8, 1.8$  Hz, 1H), 7.33-7.30 (m, 2H), 7.24-7.20 (m, 4H), 2.70-2.66 (m, 4H), 2.02-1.96 (m, 2H);  $^{13}\text{C}$  NMR (125 MHz,  $\text{CDCl}_3$ )  $\delta$  150.0, 147.4, 141.7, 137.4, 135.8, 128.4, 125.9, 123.3, 35.3, 32.6, 32.5.

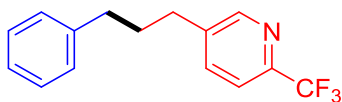

**5-(3-Phenylpropyl)-2-(trifluoromethyl)pyridine (5k).** (51 mg, 97%). Isolated by preparative TLC (hexane: ethyl acetate = 10:1,  $R_f = 0.4$ );  $^1\text{H}$  NMR (500 MHz,  $\text{CDCl}_3$ )  $\delta$  8.58 (s, 1H), 7.68 (dd,  $J = 8.0, 1.4$  Hz, 1H), 7.62 (d,  $J = 8.0$  Hz, 1H), 7.34 (m, 2H), 7.25-7.20 (m, 3H), 2.75 (t,  $J = 7.6$  Hz, 2H), 2.71 (t,  $J = 7.6$  Hz, 2H), 2.06-2.00 (m, 2H);  $^{13}\text{C}$  NMR (125 MHz,  $\text{CDCl}_3$ )  $\delta$  150.2, 146.0 (q,  $J_{\text{C-F}} = 34.4$  Hz), 141.3, 140.9, 136.9, 128.5, 128.4, 126.1, 121.6 (q,  $J_{\text{C-F}} = 273.7$  Hz), 120.1 (q,  $J_{\text{C-F}} = 2.6$  Hz), 35.2, 32.3, 32.2;  $^{19}\text{F}$  NMR (470 MHz,  $\text{CDCl}_3$ )  $\delta$  -67.6; HRMS (ESI) calcd for  $\text{C}_{15}\text{H}_{15}\text{F}_3\text{N}$  [ $\text{M} + \text{H}^+$ ], 266.1151; found: 266.1148.

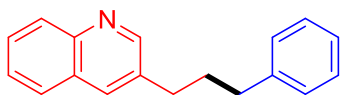

**3-(3-Phenylpropyl)quinoline (5l).** (48 mg, 98%). Isolated by preparative TLC (hexane: ethyl acetate = 3:1,  $R_f$  = 0.4);  $^1\text{H}$  NMR (400 MHz,  $\text{CDCl}_3$ )  $\delta$  8.82 (d,  $J$  = 1.4 Hz, 1H), 8.13 (d,  $J$  = 8.4 Hz, 1H), 7.93 (s, 1H), 7.79 (d,  $J$  = 8.4 Hz, 1H), 7.69 (t,  $J$  = 7.4 Hz, 1H), 7.55 (t,  $J$  = 7.4 Hz, 1H), 7.35-7.32 (m, 2H), 7.25-7.22 (m, 3H), 2.86 (t,  $J$  = 7.6 Hz, 2H), 2.74 (t,  $J$  = 7.6 Hz, 2H), 2.14-2.06 (m, 2H);  $^{13}\text{C}$  NMR (100 MHz,  $\text{CDCl}_3$ )  $\delta$  152.1, 146.9, 141.7, 134.8, 134.2, 129.2, 128.6, 128.5, 128.4, 128.2, 127.3, 126.6, 126.0, 35.3, 32.6, 32.5; HRMS (ESI) calcd for  $\text{C}_{18}\text{H}_{18}\text{N}$  [ $\text{M} + \text{H}^+$ ], 248.1434; found: 248.1427.

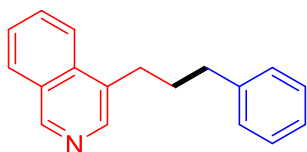

**4-(3-Phenylpropyl)isoquinoline (5m).** (45 mg, 92%). Isolated by preparative TLC (hexane: ethyl acetate = 10:1,  $R_f$  = 0.5);  $^1\text{H}$  NMR (500 MHz,  $\text{CDCl}_3$ )  $\delta$  9.16 (s, 1H), 8.42 (s, 1H), 7.99 (d,  $J$  = 8.2 Hz, 1H), 7.92 (d,  $J$  = 8.2 Hz, 1H), 7.72 (dt,  $J$  = 7.6, 1.2 Hz, 1H), 7.61 (dt,  $J$  = 7.6, 0.8 Hz, 1H), 7.35-7.32 (m, 2H), 7.25-7.22 (m, 3H), 3.07 (t,  $J$  = 8.0 Hz, 2H), 2.79 (t,  $J$  = 7.6 Hz, 2H), 2.15-2.09 (m, 2H);  $^{13}\text{C}$  NMR (125 MHz,  $\text{CDCl}_3$ )  $\delta$  151.3, 142.7, 141.8, 134.6, 130.2, 128.5, 128.4, 128.3, 126.8, 126.0, 122.9, 35.7, 32.1, 29.5; HRMS (ESI) calcd for  $\text{C}_{18}\text{H}_{18}\text{N}$  [ $\text{M} + \text{H}^+$ ], 248.1434; found: 248.1427.

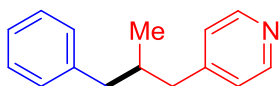

**4-(2-Methyl-3-phenylpropyl)pyridine (5n).**<sup>[2]</sup> (39 mg, 93%). Isolated by preparative TLC (hexane: ethyl acetate = 5:1,  $R_f$  = 0.5);  $^1\text{H}$  NMR (500 MHz,  $\text{CDCl}_3$ )  $\delta$  8.55 (br, 2H), 7.33-7.30 (m, 2H), 7.24-7.21 (m, 1H), 7.18-7.16 (m, 2H), 7.11 (br, 2H), 2.70 (dd,  $J$  = 13.4, 5.8 Hz, 1H), 2.67 (dd,  $J$  = 13.4, 6.4 Hz, 1H), 2.50 (dd,  $J$  = 13.4, 8.0 Hz, 1H), 2.40 (dd,  $J$  = 13.4, 8.6 Hz, 1H), 2.14-2.07 (m, 1H), 0.87 (d,  $J$  = 6.6 Hz, 3H);  $^{13}\text{C}$  NMR (125 MHz,  $\text{CDCl}_3$ )  $\delta$  150.3, 149.6, 140.6, 129.1, 128.3, 126.0, 124.8, 43.3, 42.5, 36.5, 19.2.

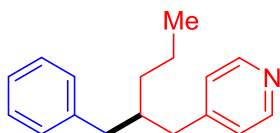

**4-(2-Benzylpentyl)pyridine (5o).** (43 mg, 90%). Isolated by preparative TLC (hexane: ethyl acetate = 5:1,  $R_f$  = 0.5);  $^1\text{H}$  NMR (500 MHz,  $\text{CDCl}_3$ )  $\delta$  8.50 (br, 2H), 7.32-7.29 (m, 2H), 7.23-7.20 (m, 1H), 7.16-7.14 (m, 2H), 7.07 (d,  $J$  = 5.6 Hz, 2H), 2.66 (dd,  $J$  = 13.6, 7.0 Hz, 1H), 2.59-2.48 (m, 3H), 2.07-1.98 (m, 1H), 1.43-1.34 (m, 2H),

1.29-1.23 (m, 2H), 0.86 (t,  $J = 7.2$  Hz, 3H);  $^{13}\text{C}$  NMR (125 MHz,  $\text{CDCl}_3$ )  $\delta$  150.6, 149.6, 140.7, 129.1, 128.3, 126.0, 124.7, 41.0, 40.2, 39.5, 35.2, 19.7, 14.2; HRMS (ESI) calcd for  $\text{C}_{17}\text{H}_{22}\text{N}$  [ $\text{M} + \text{H}^+$ ], 240.1747; found: 240.1749.

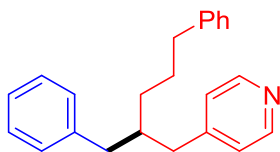

**4-(2-Benzyl-5-phenylpentyl)pyridine (5p).** (53 mg, 85%). Isolated by preparative TLC (hexane: ethyl acetate = 5:1,  $R_f = 0.4$ );  $^1\text{H}$  NMR (400 MHz,  $\text{CDCl}_3$ )  $\delta$  8.67 (br, 2H), 7.32-7.26 (m, 4H), 7.24-7.19 (m, 2H), 7.14-7.10 (m, 6H), 2.68-2.63 (m, 1H), 2.57-2.49 (m, 5H), 2.10-2.00 (m, 1H), 1.74-1.66 (m, 2H), 1.36-1.31 (m, 2H);  $^{13}\text{C}$  NMR (100 MHz,  $\text{CDCl}_3$ )  $\delta$  150.5, 149.1, 142.3, 140.5, 129.1, 128.4, 128.3, 128.2, 126.0, 125.8, 41.1, 40.2, 39.5, 35.9, 32.3, 28.4; HRMS (ESI) calcd for  $\text{C}_{23}\text{H}_{26}\text{N}$  [ $\text{M} + \text{H}^+$ ], 316.2060; found: 316.2059.

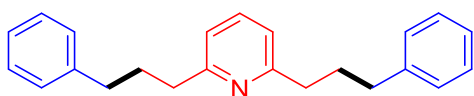

**2,6-Bis(3-phenylpropyl)pyridine (5r).**<sup>[13]</sup> (29 mg, 92%). Isolated by preparative TLC (hexane: ethyl acetate = 4:1,  $R_f = 0.4$ );  $^1\text{H}$  NMR (500 MHz,  $\text{CDCl}_3$ )  $\delta$  7.52 (t,  $J = 7.2$  Hz, 1H), 7.32-7.29 (m, 4H), 7.24-7.20 (m, 6H), 6.98 (d,  $J = 7.2$  Hz, 2H), 2.85 (t,  $J = 7.4$  Hz, 4H), 2.72 (t,  $J = 7.4$  Hz, 4H), 2.13-2.06 (m, 4H);  $^{13}\text{C}$  NMR (125 MHz,  $\text{CDCl}_3$ )  $\delta$  161.4, 142.3, 136.5, 128.5, 128.3, 125.7, 119.9, 38.1, 35.6, 31.8.

### 3. Gram-scale synthesis of product 4aa

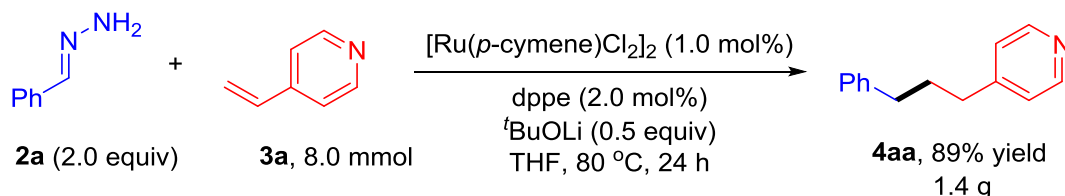

Preparation of hydrazone **2a**: a mixture of benzaldehydes **1** (16.0 mmol, 2.0 equiv) and hydrazine monohydrate (1.0 mL, 19.2 mmol, 64–65 wt%, 2.4 equiv) in THF (30.0 mL) solution was stirred for 120 min at room temperature. After that, 1.0 g of anhydrous  $\text{Na}_2\text{SO}_4$  was added. The resulting mixture was filtered and the filtrate was evaporated *in vacuo* before use.

A flame-dried Schlenk tube (25  $\text{cm}^3$ ) equipped with a magnetic stir bar was charged with  $[\text{Ru}(p\text{-cymene})\text{Cl}_2]_2$  (50 mg, 1.0 mol%) and dppe (64 mg, 2.0 mol%). The tube was transferred to the glovebox and charged with THF (1.0 mL) before being sealed with Teflon septum. The reaction mixture was stirred at room temperature for 60 min. Then vinylpyridine **3a** (8.0 mmol, 1.0 equiv), hydrazone **2a** (16.0 mmol, dissolved in 6.0 mL THF) and  $t\text{BuOLi}$  (4.0 mmol, 320 mg) was added sequentially. After that, the reaction mixture was sealed with Teflon septum, moved out of glovebox, and stirred at 80  $^\circ\text{C}$  for 24 hour. After the mixture was cooled to room temperature, the Teflon septum was removed carefully. [**Caution:  $\text{N}_2$  was generated in the reaction and should be released slowly**]. Water (5.0 mL)

and ether (30.0 mL) were added to the resulting mixture. The aqueous solution was separated and extracted with ether (2 x 25.0 mL). The organic layer was then washed with brine and dried over anhydrous Na<sub>2</sub>SO<sub>4</sub>. Evaporation and column chromatography on silica gel (ethyl acetate/hexane = 1:5 to 1:3) to give the pure product **4ae** (1.4 g, 89%).

## 4. Control experiments

Reaction of *N*-Ts hydrazone with vinylpyridine

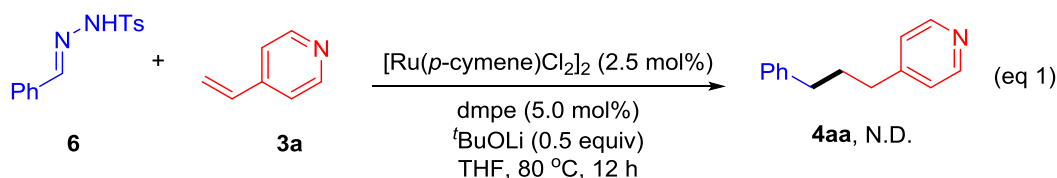

*N*-Ts hydrazone **6** was used in the place of **2a**, and the other operations were following the general procedure. No desired product **4aa** was detected under the standard conditions.

Deuterium experiment

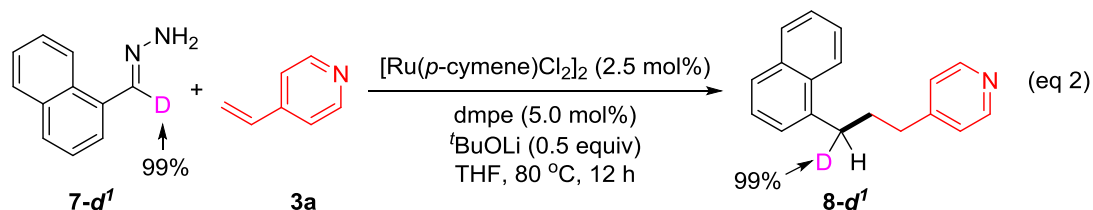

The deuterated aldehyde **7-d<sup>1</sup>** was synthesized according to the literature.<sup>[14]</sup> **7-d<sup>1</sup>** was used in the place of **2a**, and the other operations were following the general procedure. No H/D loss or scrambling among benzylic moiety and other positions. <sup>1</sup>H NMR (400 MHz, CDCl<sub>3</sub>) δ 8.54 (br, 2H), 7.98 (d, *J* = 7.8 Hz, 1H), 7.89 (dd, *J* = 8.2, 1.6 Hz, 1H), 7.76 (d, *J* = 8.2 Hz, 1H), 7.55-7.48 (m, 2H), 7.43 (t, *J* = 7.6 Hz, 1H), 7.34 (d, *J* = 6.8 Hz, 1H), 7.16 (br, 2H), 3.12 (t, *J* = 7.4 Hz, 1H), 2.75 (t, *J* = 7.8 Hz, 2H), 2.16-2.10 (m, 2H); <sup>13</sup>C NMR (100 MHz, CDCl<sub>3</sub>) δ 151.1, 141.7, 137.7, 134.0, 131.8, 128.9, 126.8, 126.0, 125.9, 125.5, 124.0, 123.6, 35.1, 32.0 (*J*<sub>C-D</sub> = 19.5 Hz), 31.0; <sup>2</sup>H NMR (61 MHz, CDCl<sub>3</sub>) δ 3.12. HRMS (APCI) calcd for C<sub>18</sub>H<sub>17</sub>DN [M + H<sup>+</sup>], 249.1497; found: 249.1495.

## 5. References

- [1] E. C. Hansen, C. Li, S. Yang, D. Pedro and D. J. Weix, *J. Org. Chem.*, 2017, **82**, 7085-7092.
- [2] W.-C. Lee, C.-H. Chen, C.-Y. Liu, M.-S. Yu, Y.-H. Lin and T.-G. Ong, *Chem. Commun.*, 2015, **51**, 17104-17107.
- [3] F. Lima, U. K. Sharma, L. Grunenberg, D. Saha, S. Johannsen, J. Sedelmeier, E. V. Vander Eycken and S. V. Ley, *Angew. Chem. Int. Ed.*, 2017, **56**, 15136-15140.
- [4] I. Terada, K. Matsuzaki, K. Nonoshita and F. Fujita, WO 9002736; Idemitsu Kosan Co., Ltd.: Japan, 1990; 129

pp.

- [5] G. van der Heijden, T. B. van Schaik, V. Mouarrawis, M. J. M. de Wit, C. M. L. V. Velde, E. Ruijter and R. V. A. Orru, *Eur. J. Org. Chem.*, 2019, 5313-5325.
- [6] A. I. M. C. Lobo Ferreira, A. S. M. C. Rodrigues, M. Villas, E. Tojo, L. P. N. Rebelo and L. M. N. B. F. Santos, *ACS Sustain. Chem. Eng.*, 2019, **7**, 2989-2997.
- [7] J. M. Howell, K. Feng, J. R. Clark, L. J. Trzepkowski and M. C. White, *J. Am. Chem. Soc.*, 2015, **137**, 14590-14593.
- [8] F. W. Vierhapper and E. L. Eliel, *J. Org. Chem.*, 1975, **40**, 2729-2734.
- [9] W. M. Stalick and H. Pines, *J. Org. Chem.*, 1970, **35**, 422-426.
- [10] L. Capaldo, M. Fagnoni and D. Ravelli, *Chem.-Eur. J.*, 2017, **23**, 6527-6530.
- [11] Q. Sun, P. Chen, Y. Wang, Y. Luo, D. Yuan and Y. Yao, *Inorg. Chem.*, 2018, **57**, 11788-11800.
- [12] W. Jo, J. Kim, S. Choi and S. H. Cho, *Angew. Chem. Int. Ed.*, 2016, **55**, 9690-9694.
- [13] S. Laulhé J. M. Blackburn and J. L. Roizen, *Chem. Commun.*, 2017, **53**, 7270-7273.

## 6. Copies of $^1\text{H}$ NMR and $^{13}\text{C}$ NMR spectra for all products

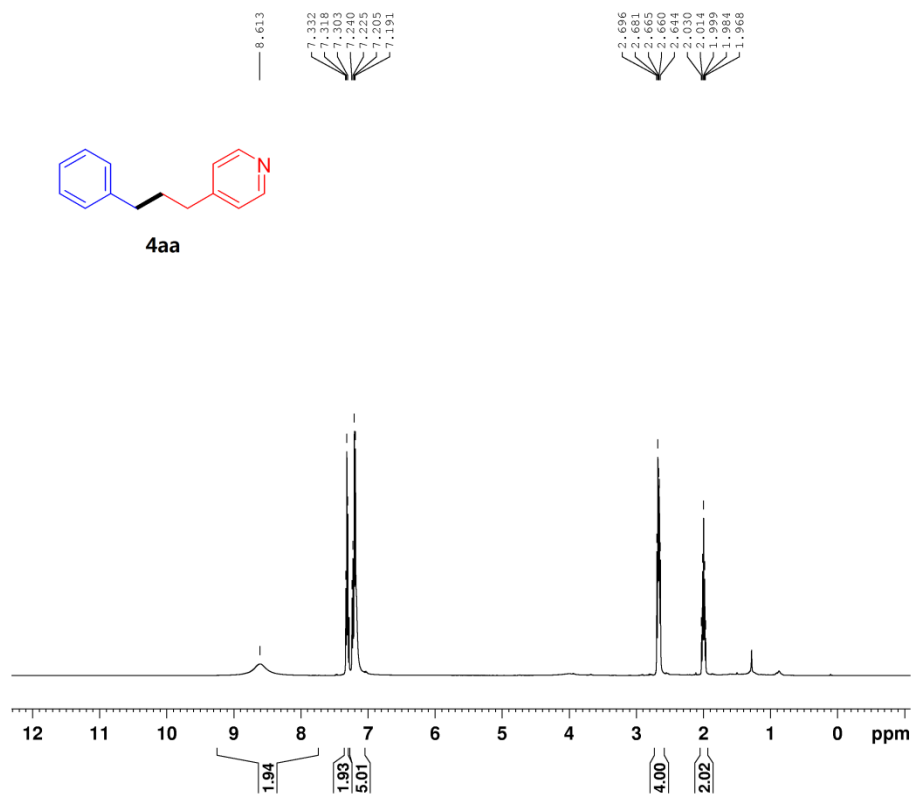



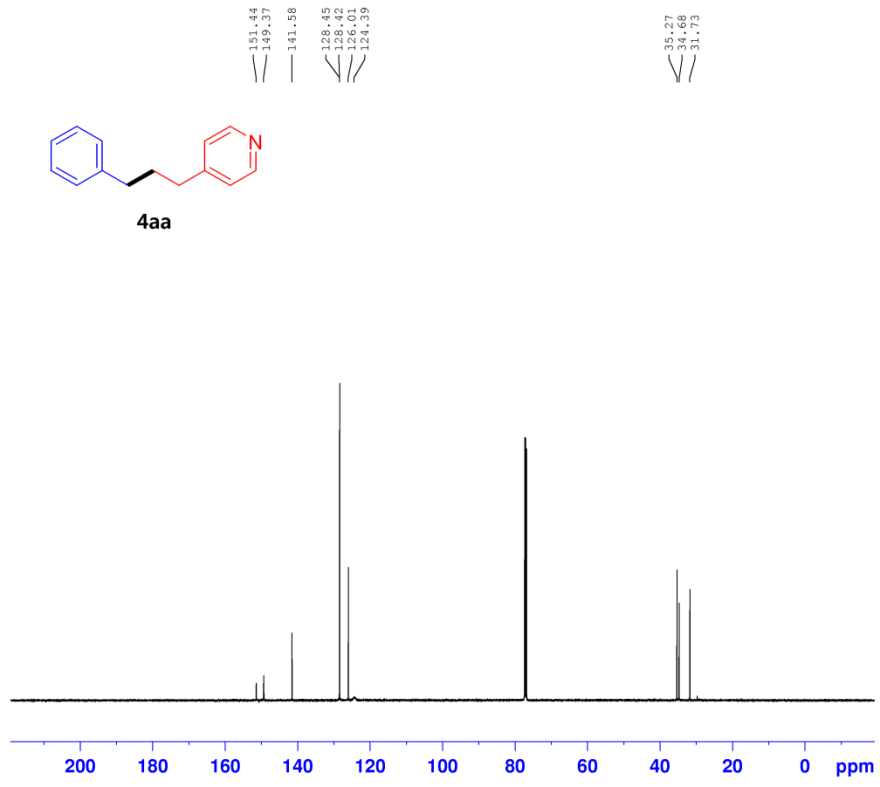

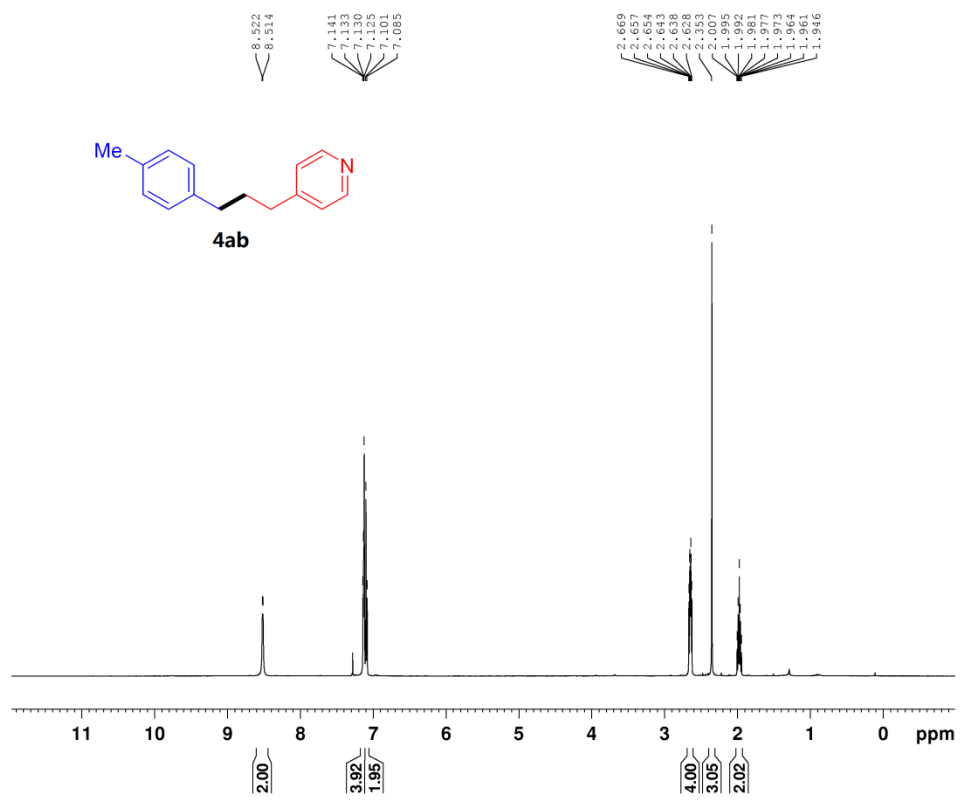

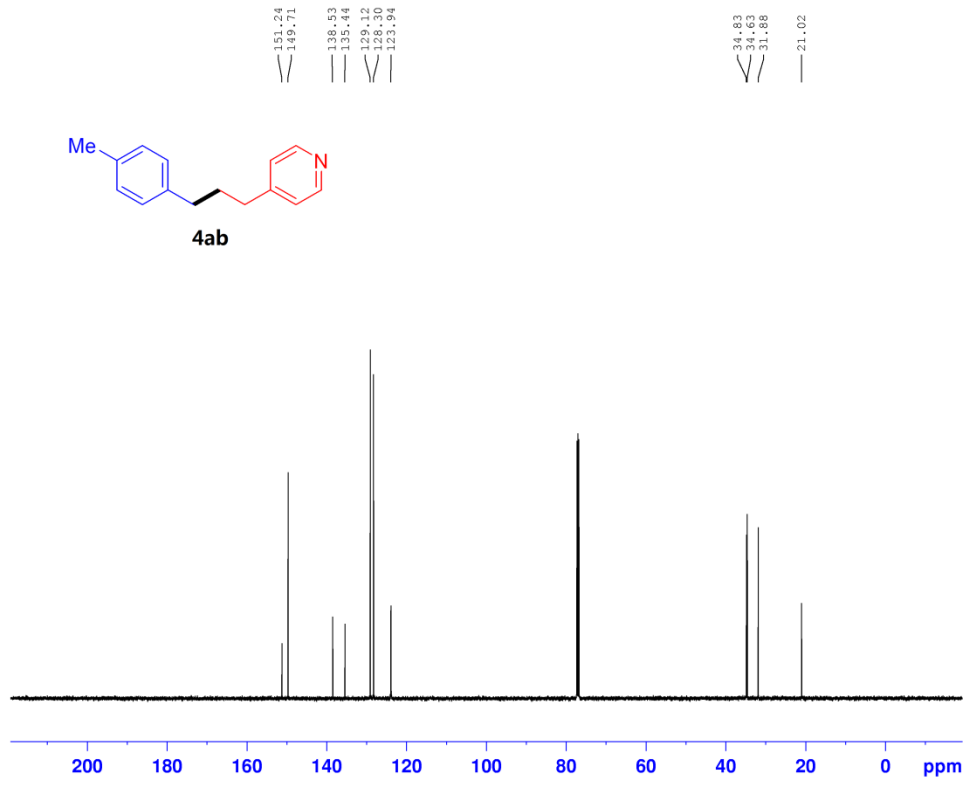

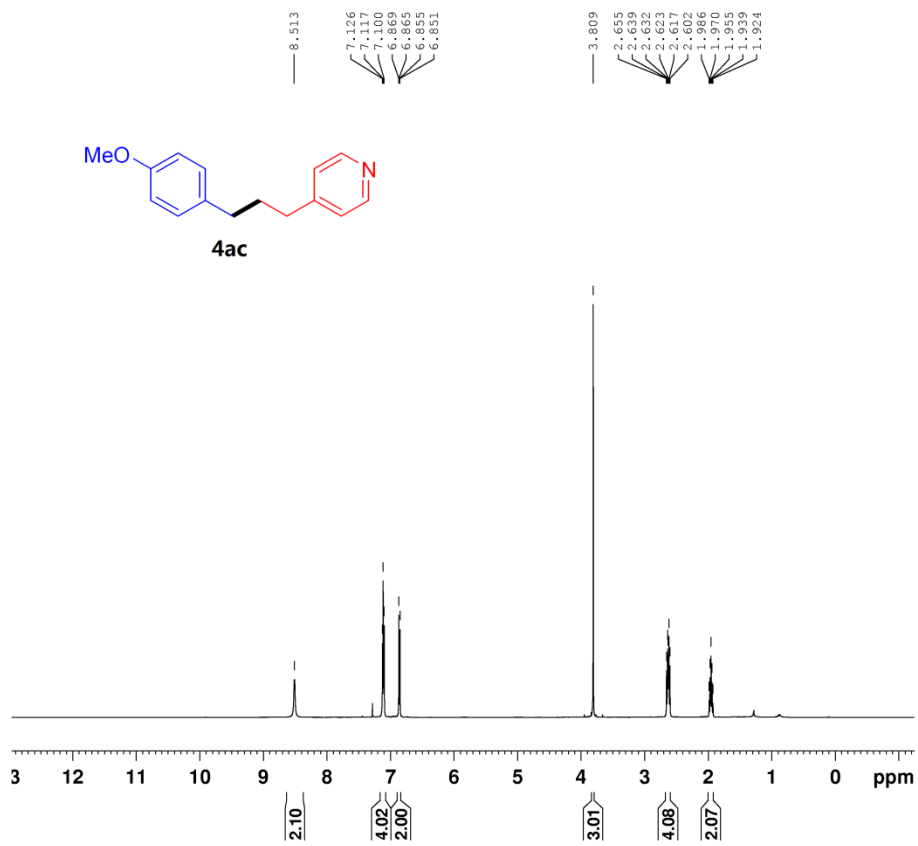

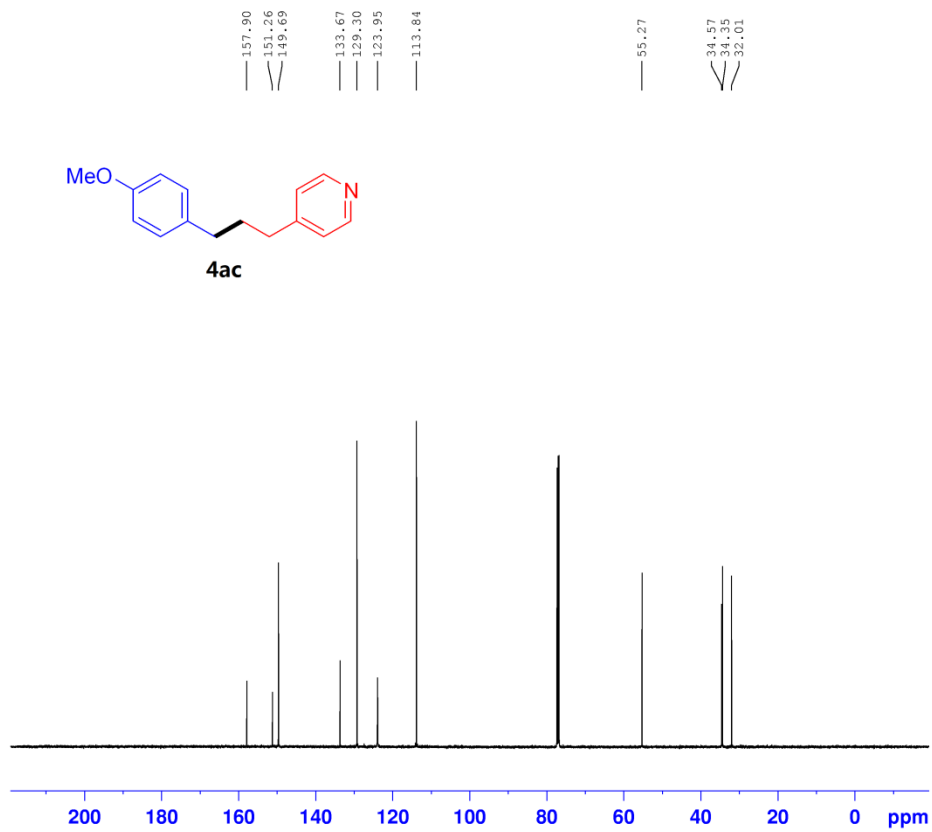

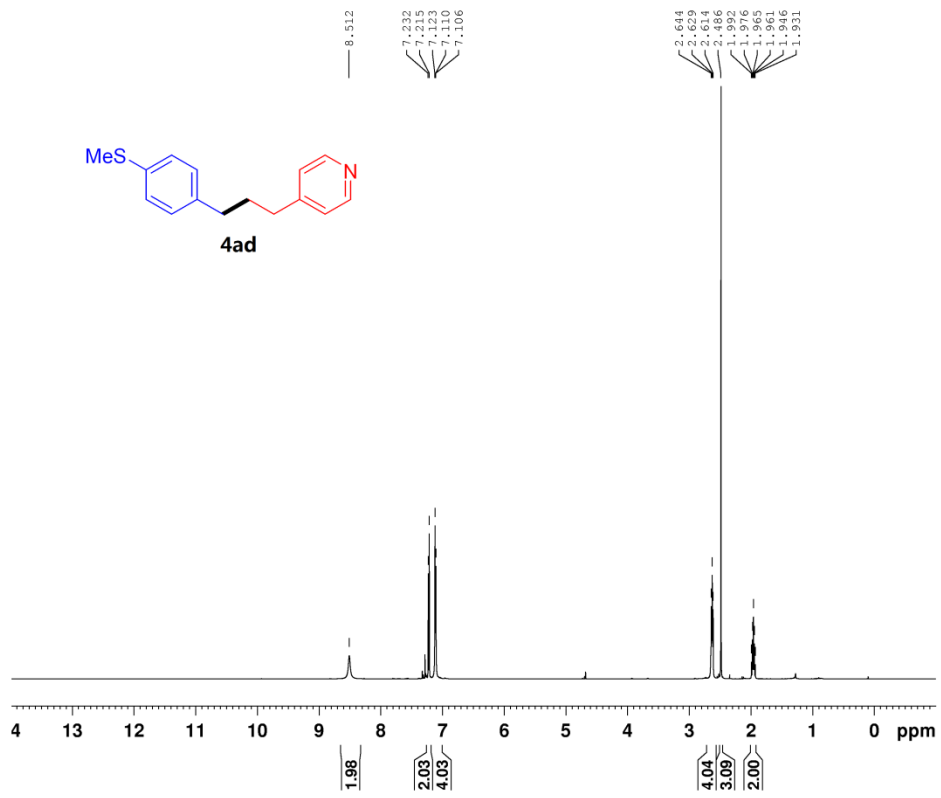

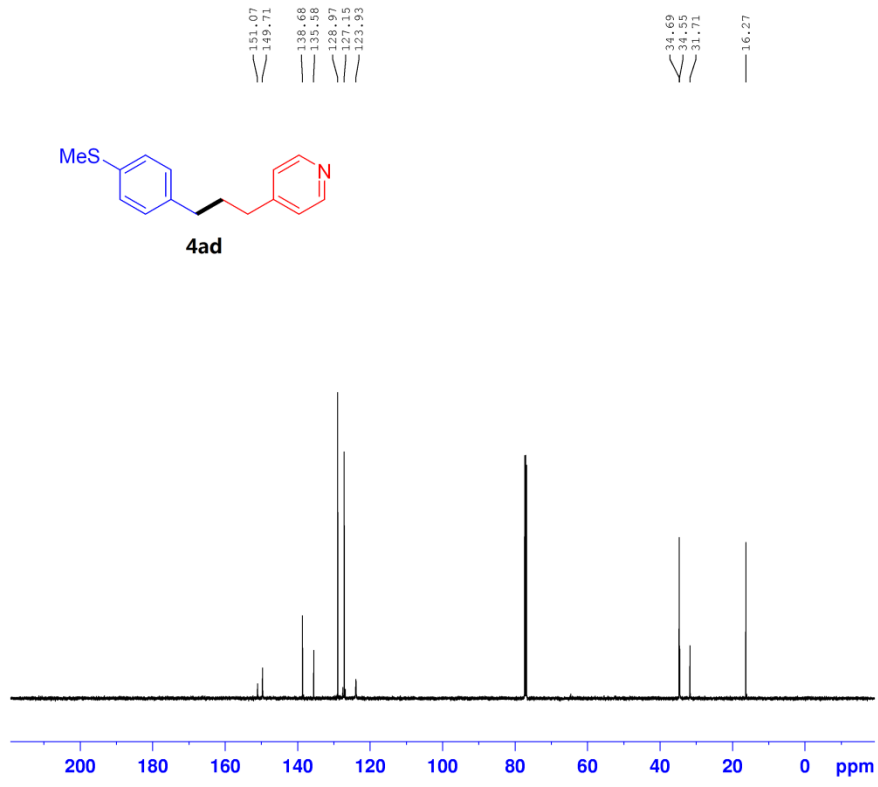

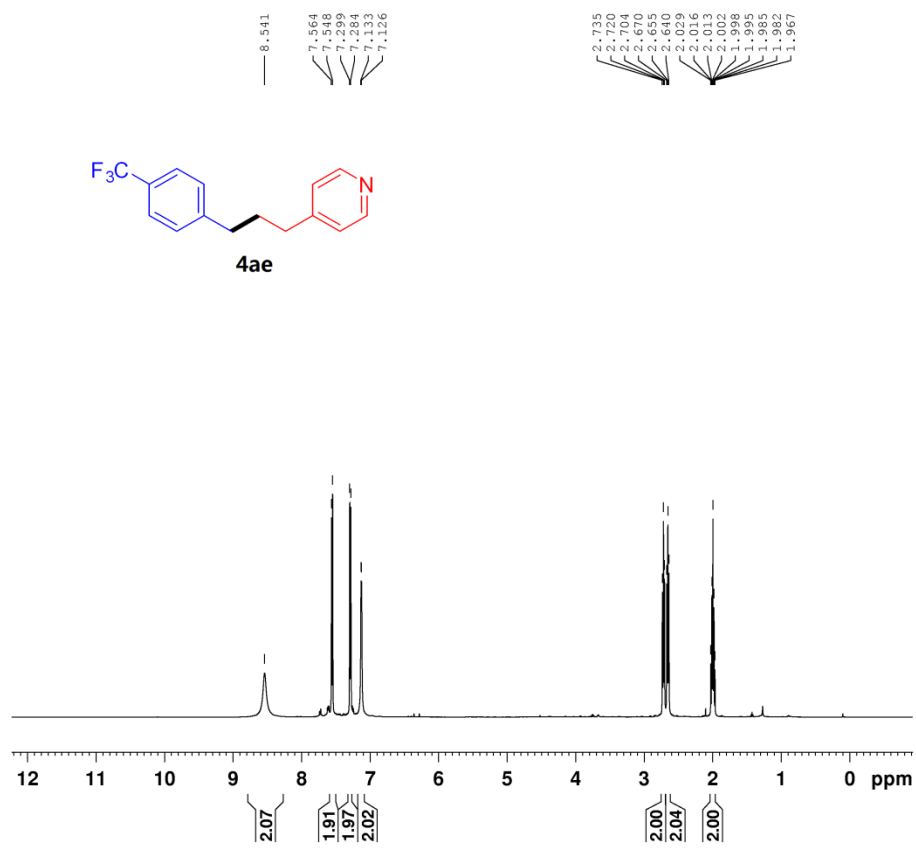



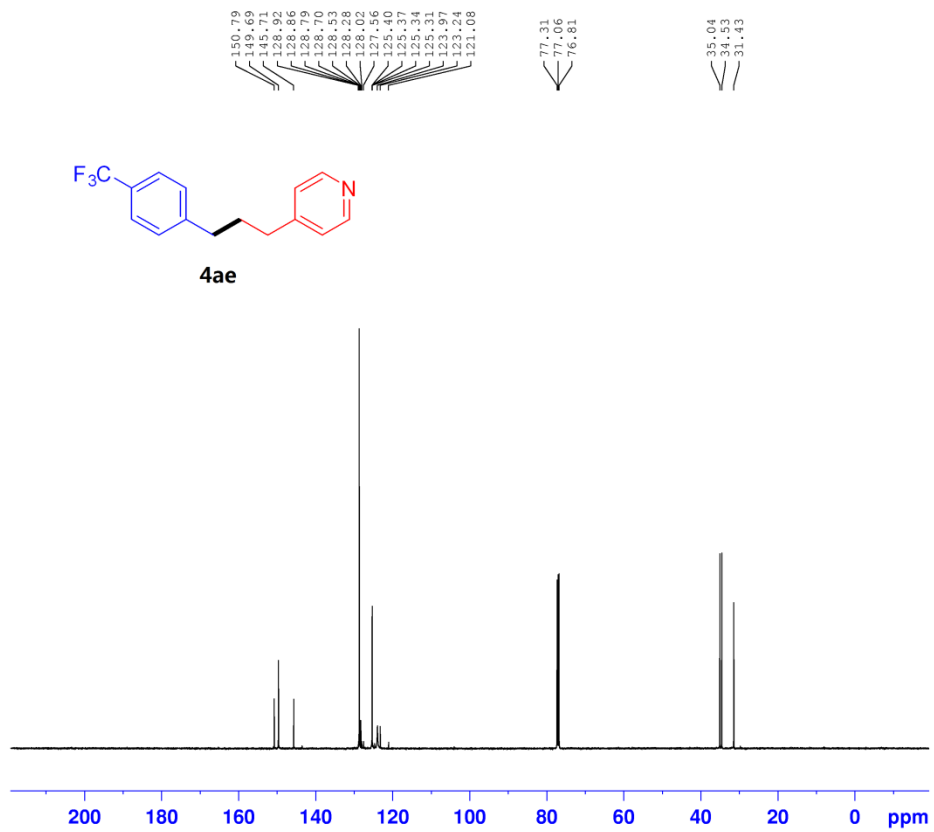

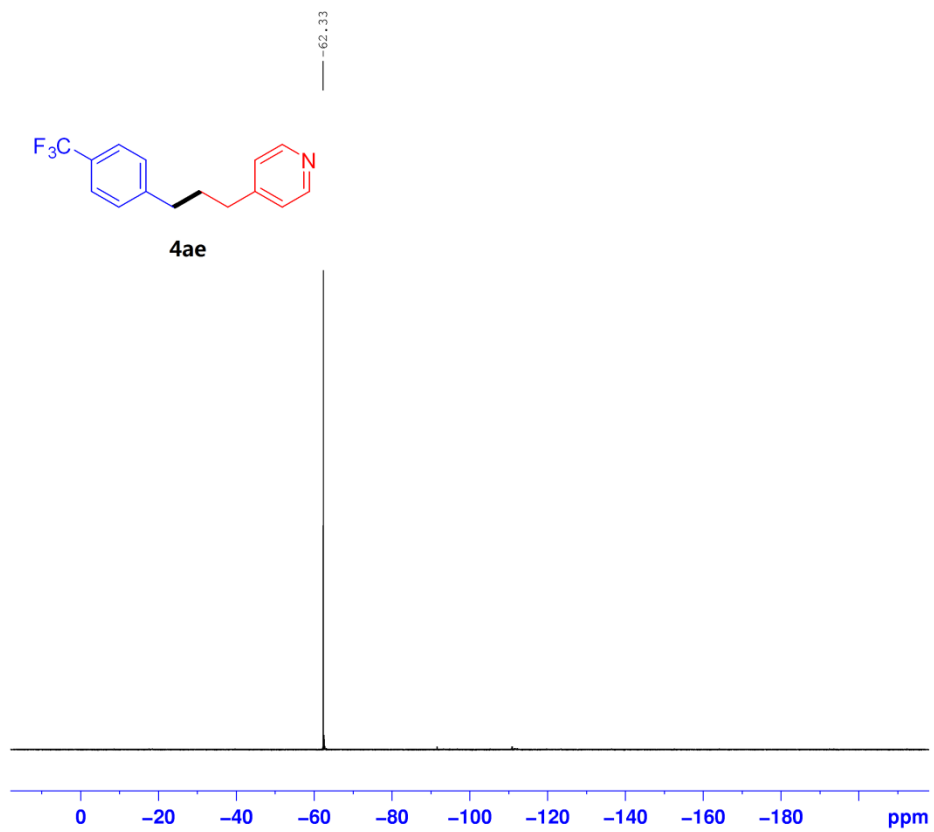

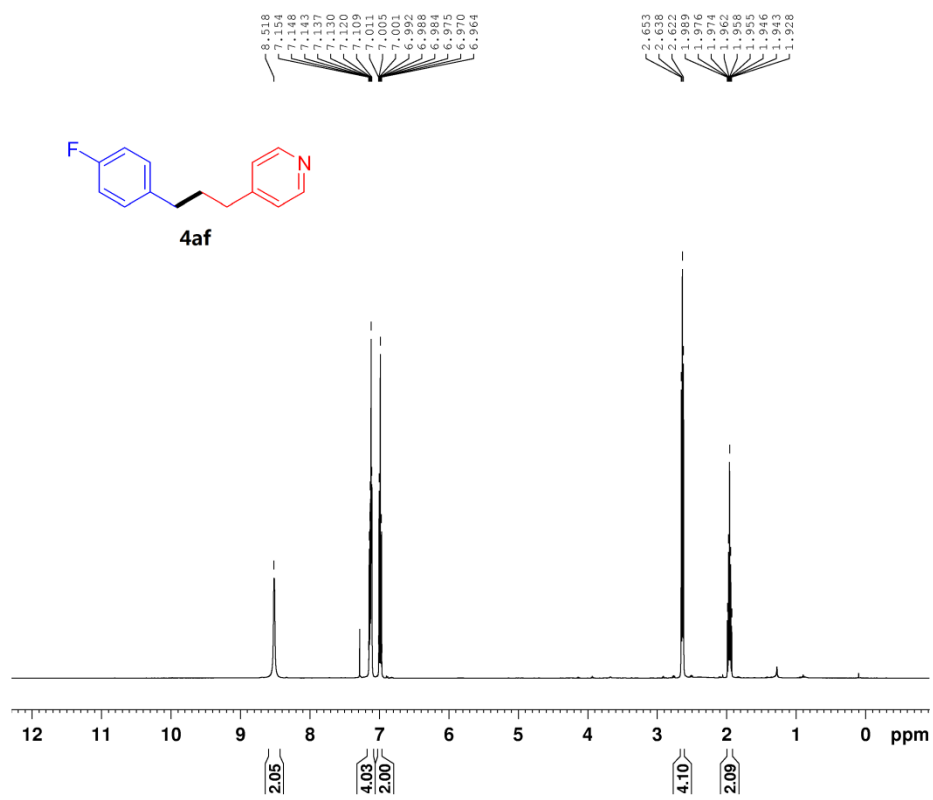

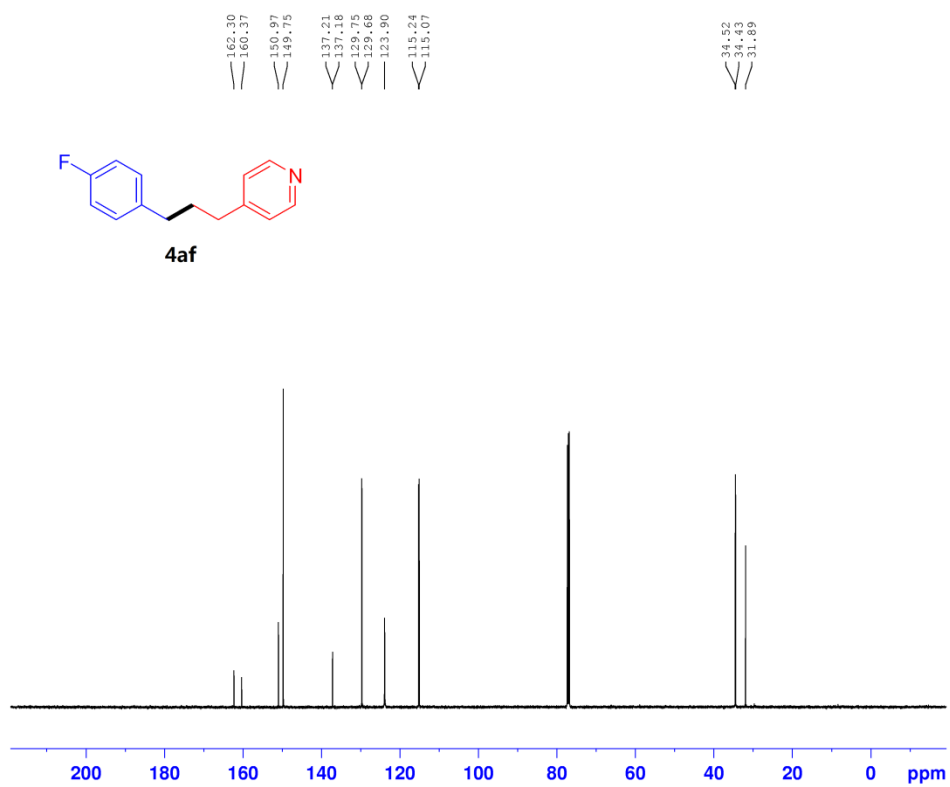

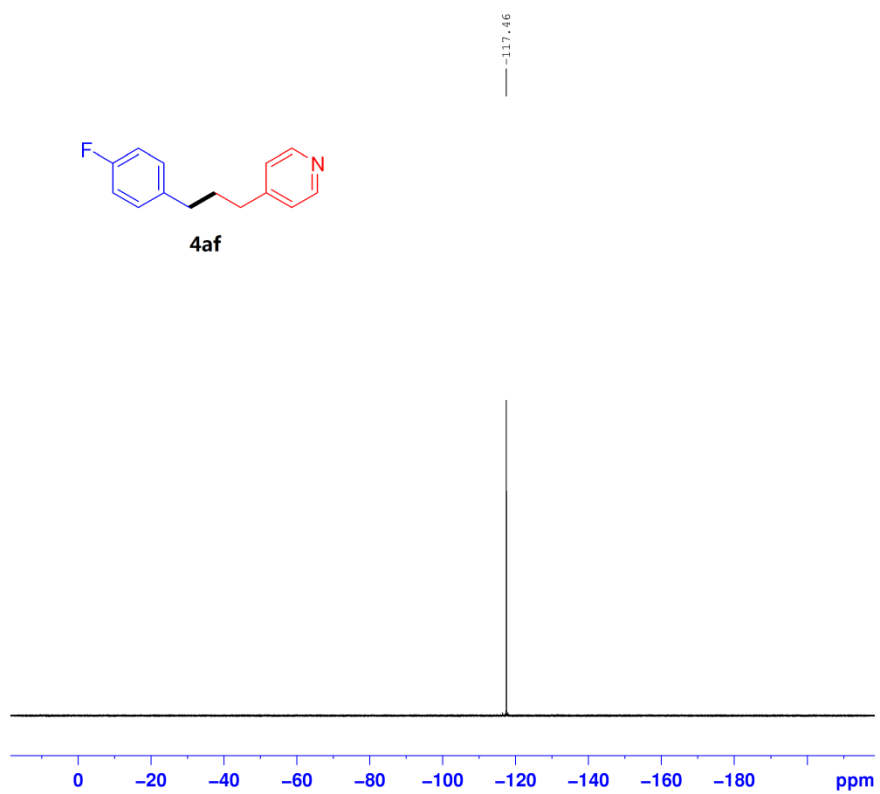

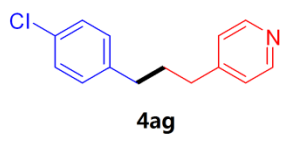

8.536  
7.584  
7.278  
7.274  
7.265  
7.261  
7.132  
7.124  
7.120  
7.106  
7.103  
7.098

2.654  
2.650  
2.636  
2.622  
1.991  
1.978  
1.975  
1.964  
1.960  
1.956  
1.947  
1.944  
1.929

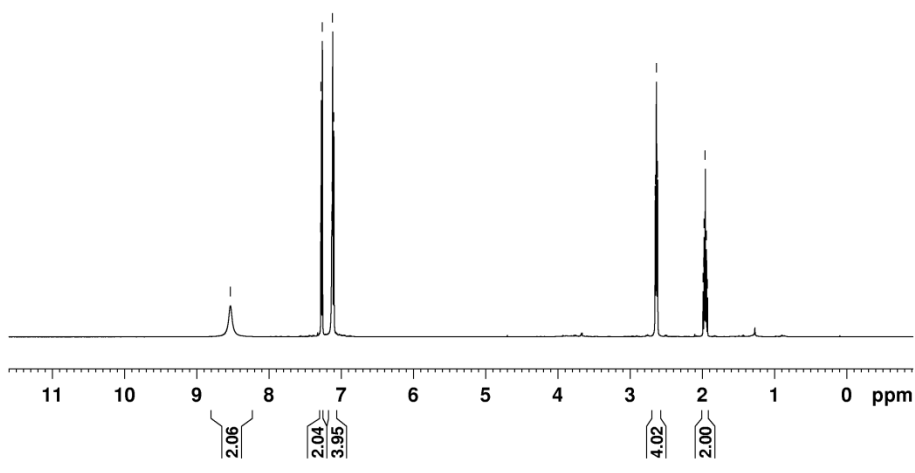

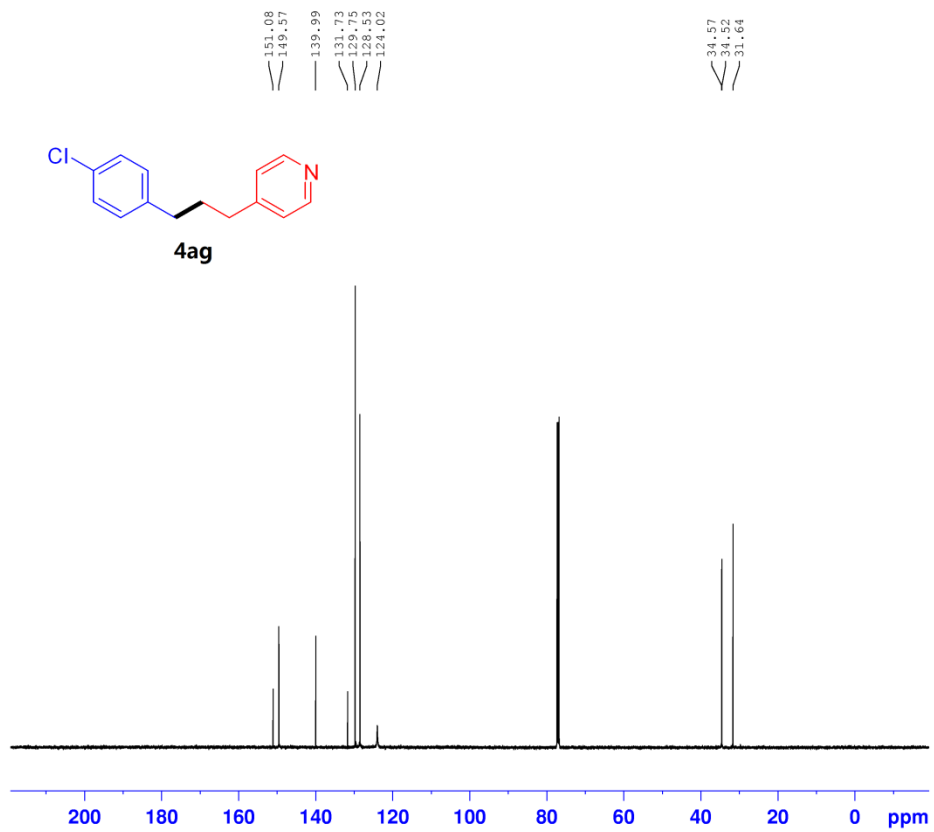

8.515  
7.219  
7.208  
7.204  
7.199  
7.197  
7.193  
7.185  
7.181  
7.178  
7.175  
7.165  
7.135  
7.124  
7.092  
7.090  
7.077  
7.063  
7.060  
7.048  
7.029  
7.012  
7.011

2.723  
2.707  
2.692  
2.683  
2.652  
2.652  
2.010  
1.997  
1.994  
1.975  
1.963  
1.948

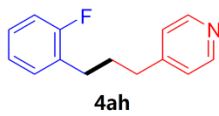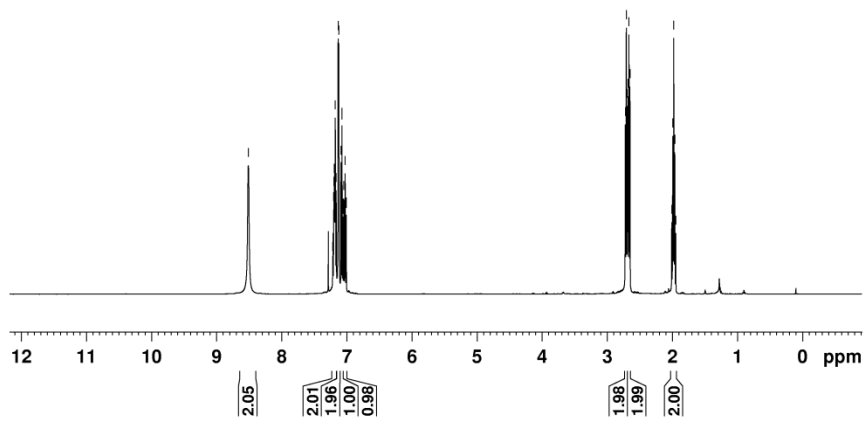



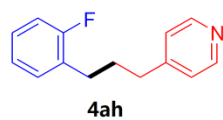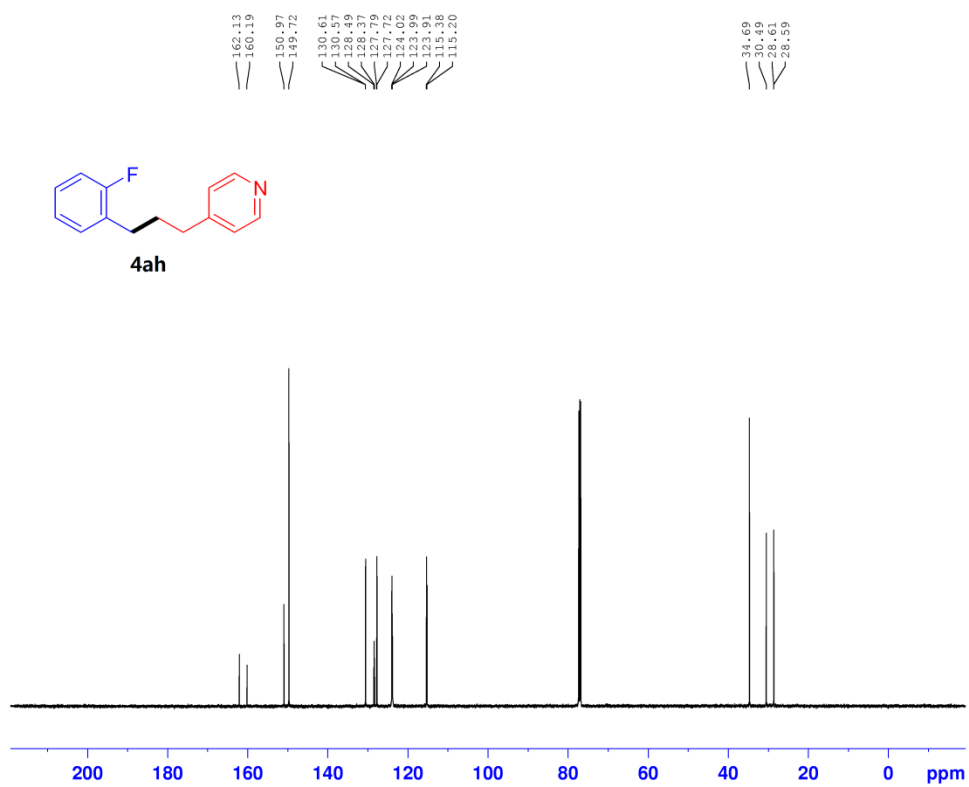

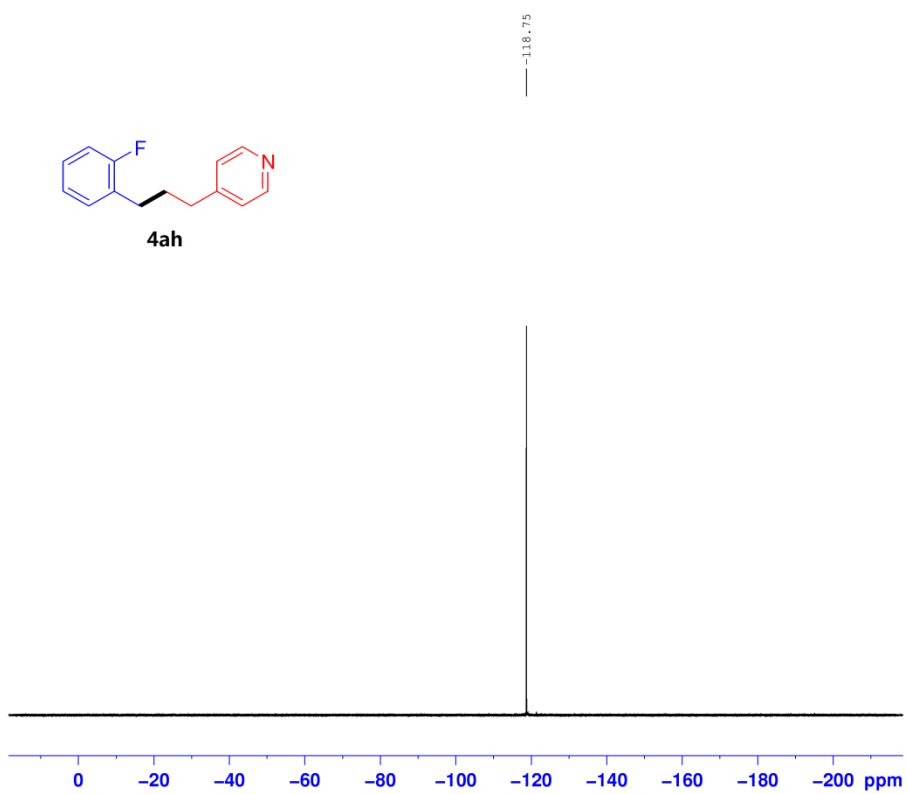

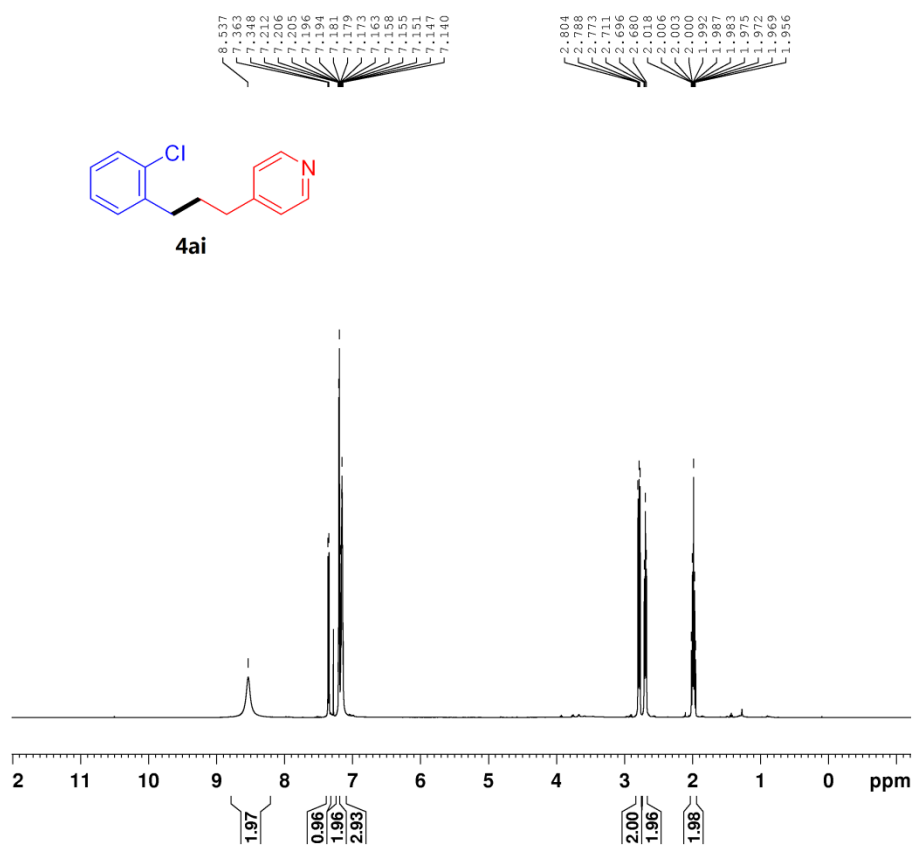

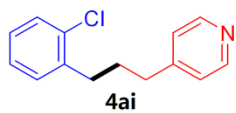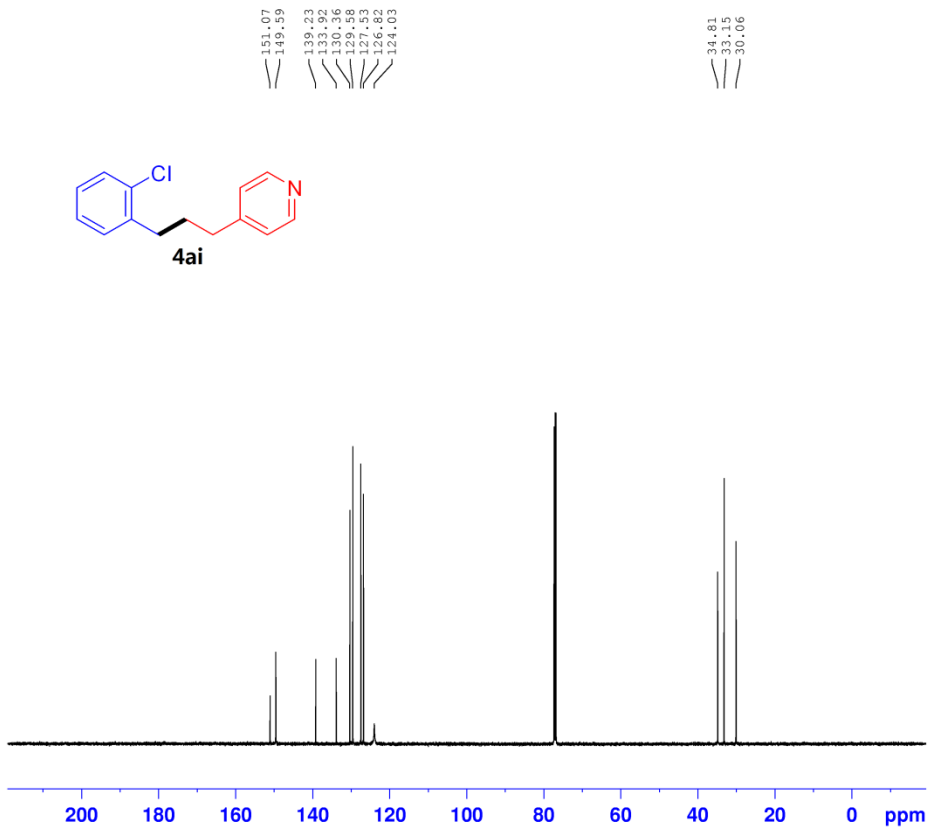

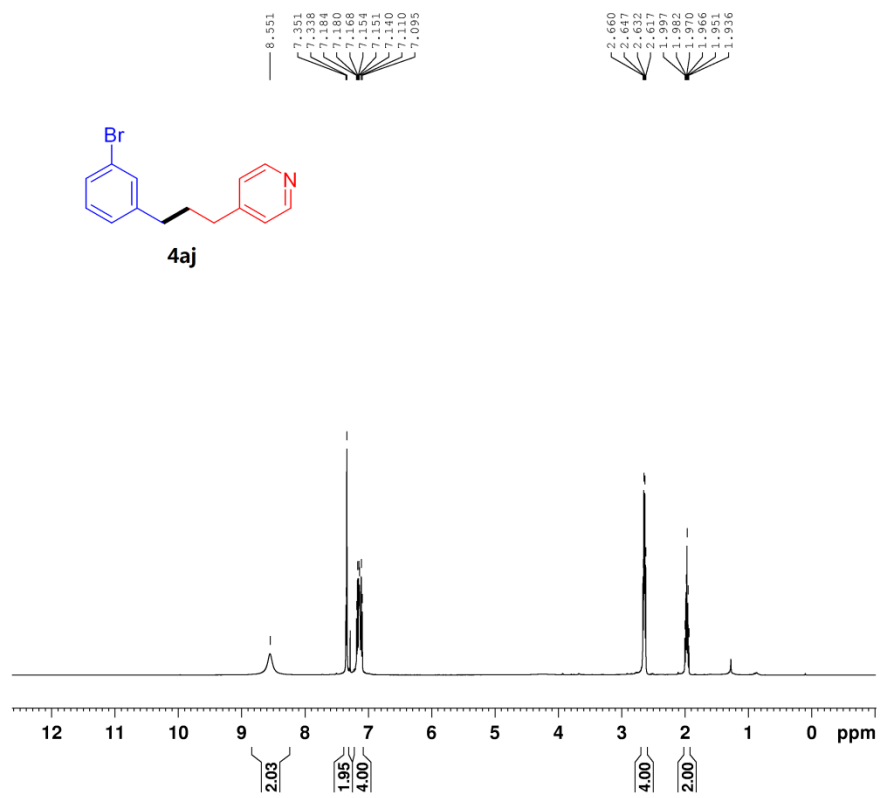

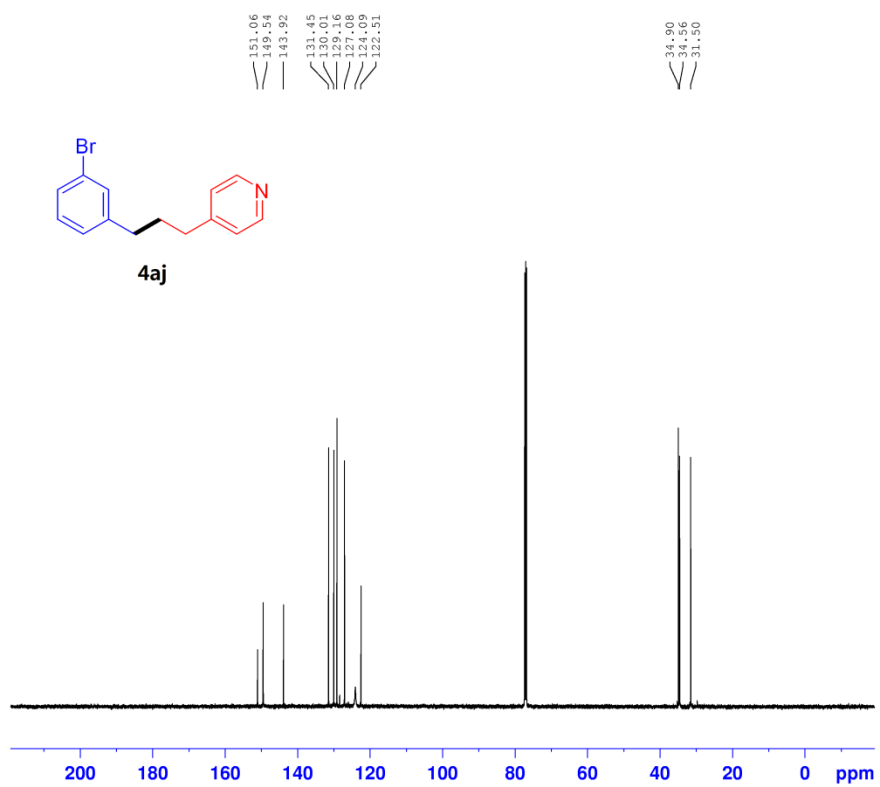

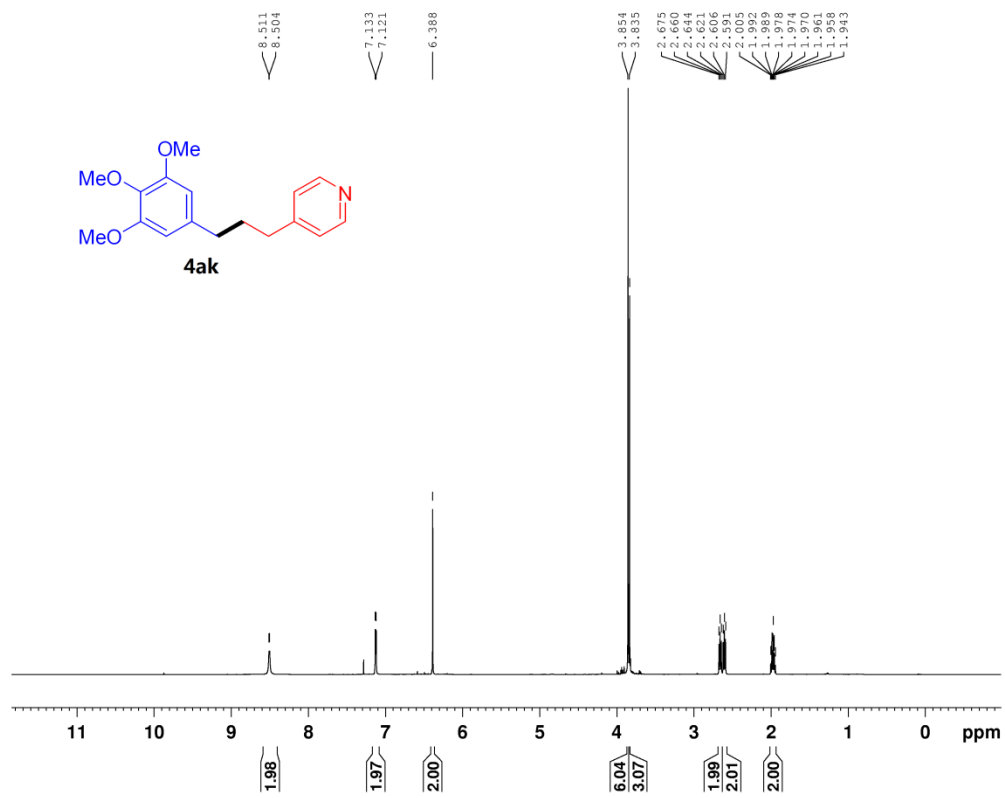

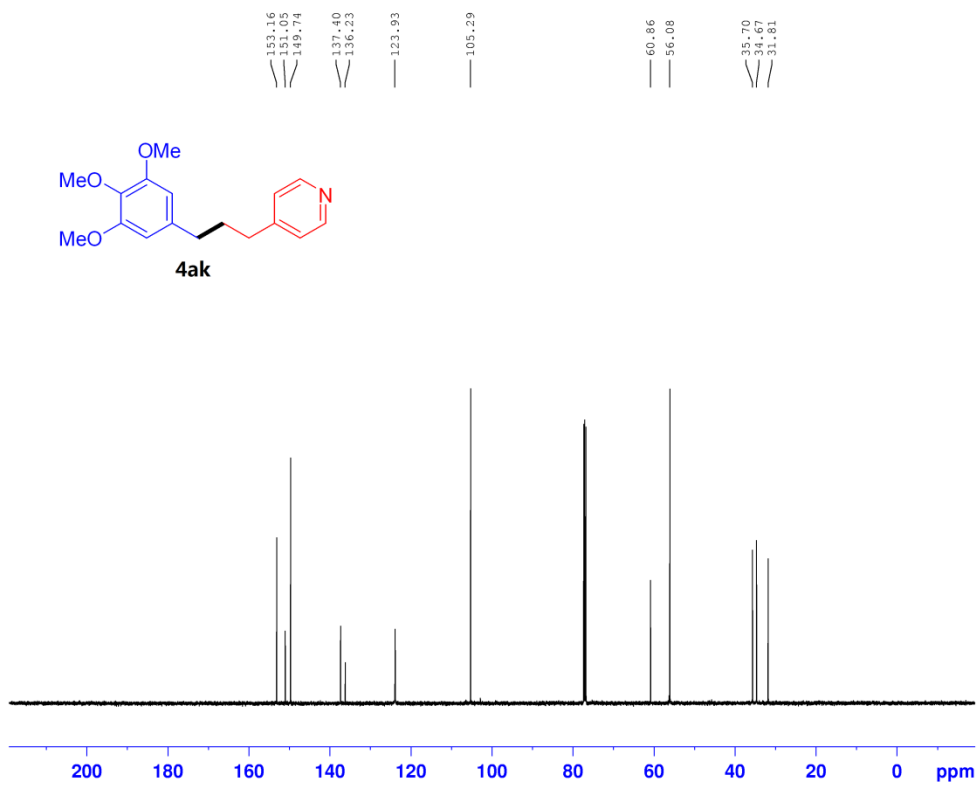



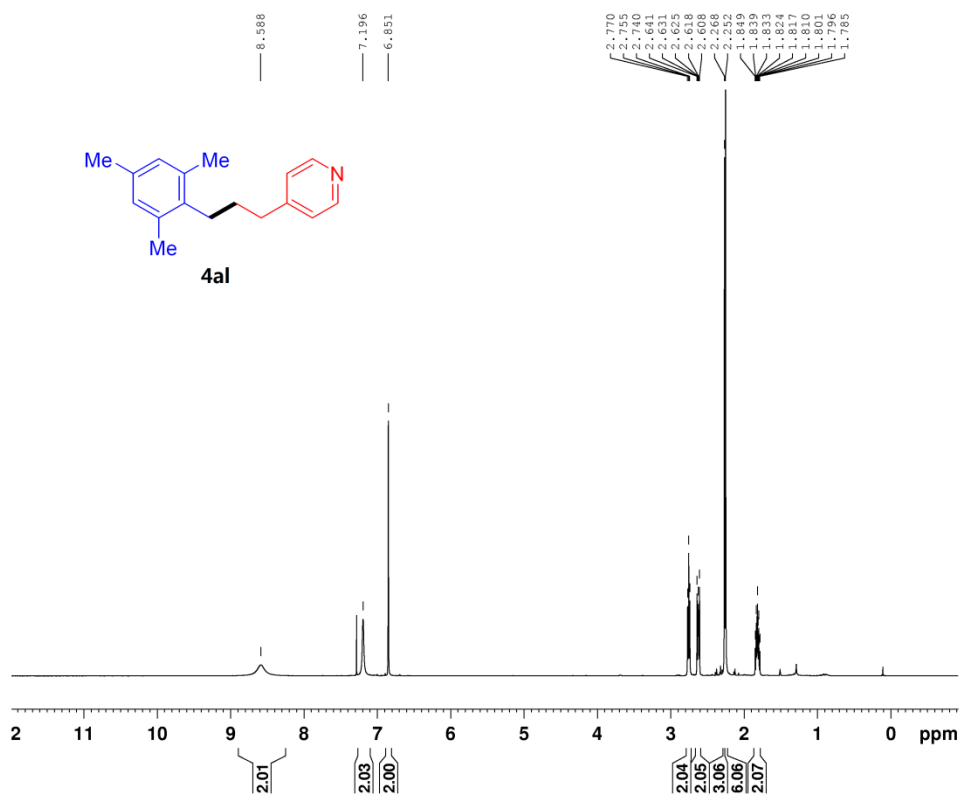

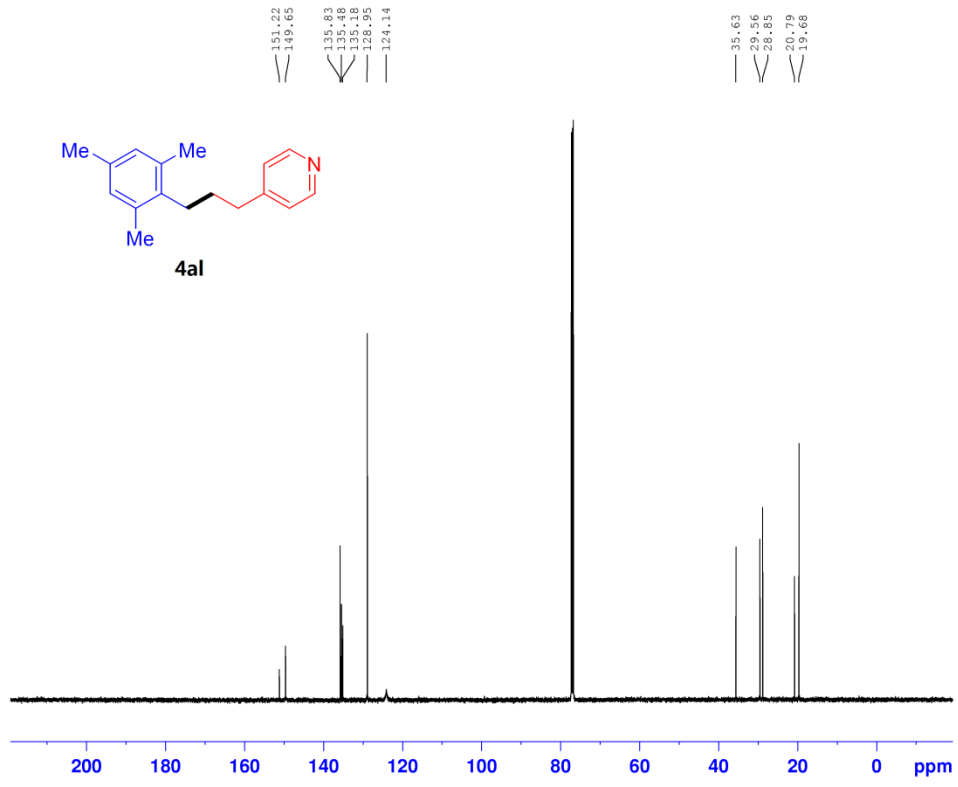

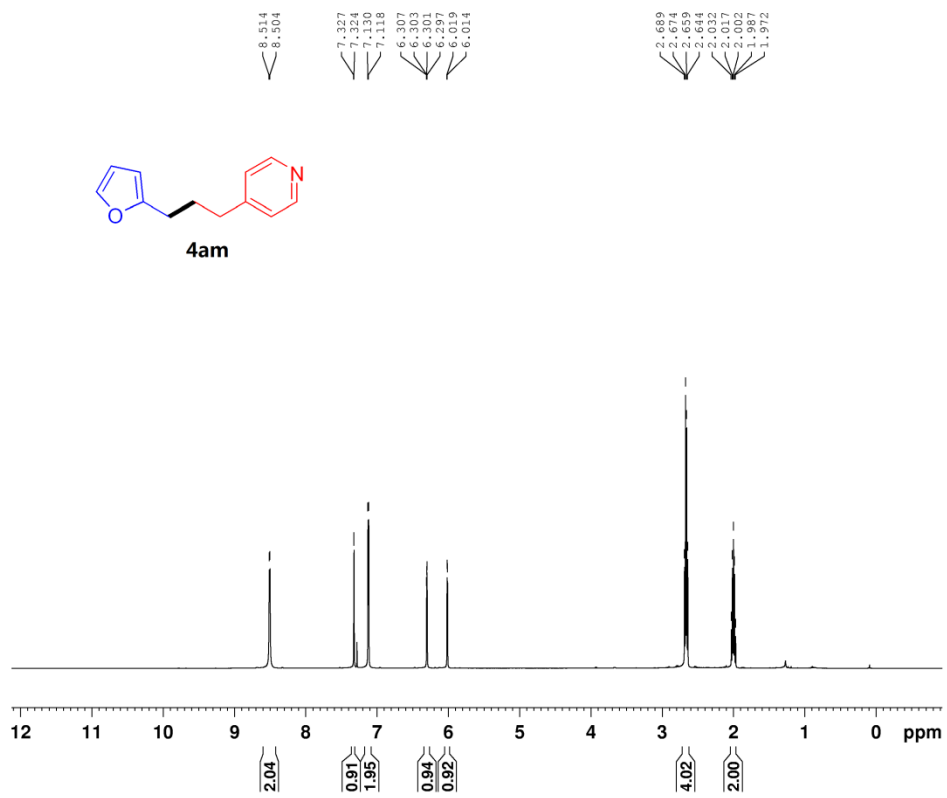

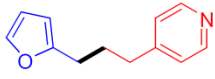

4am

155.25  
150.82  
149.74  
141.02  
123.93  
110.13  
105.25  
34.42  
28.55  
27.29

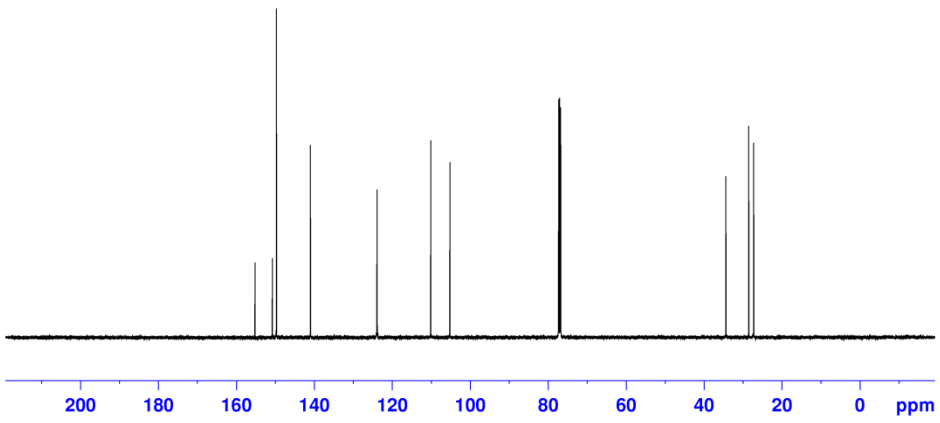

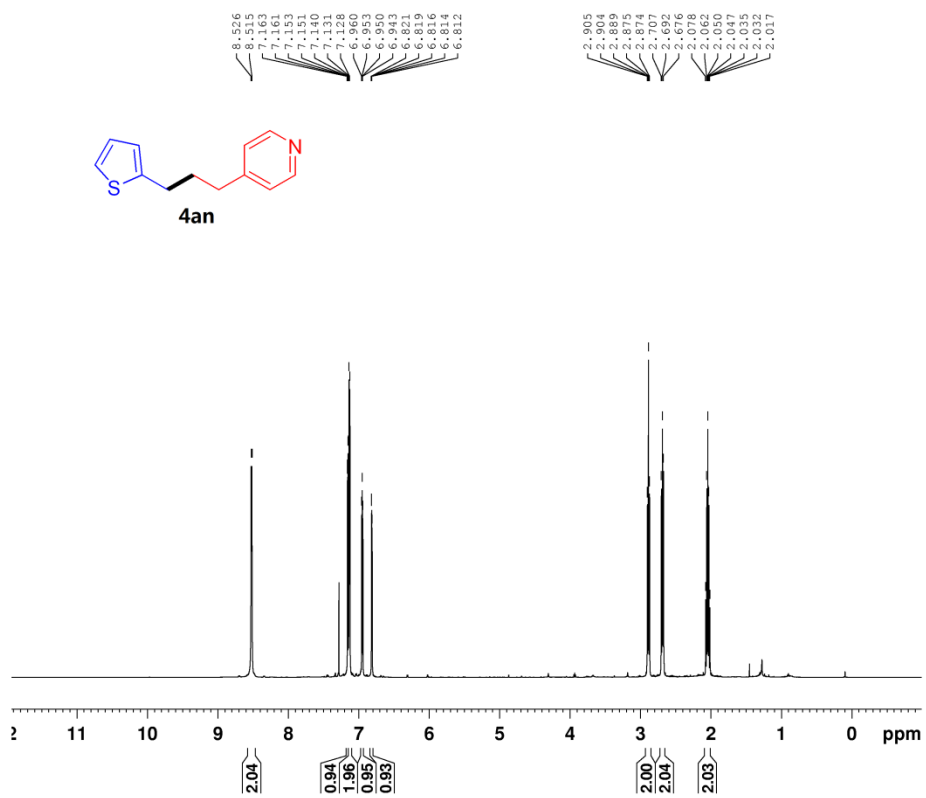

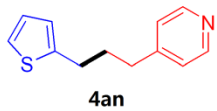

150.78  
149.77  
144.37

126.81  
124.45  
123.29  
123.22

34.35  
32.10  
29.23

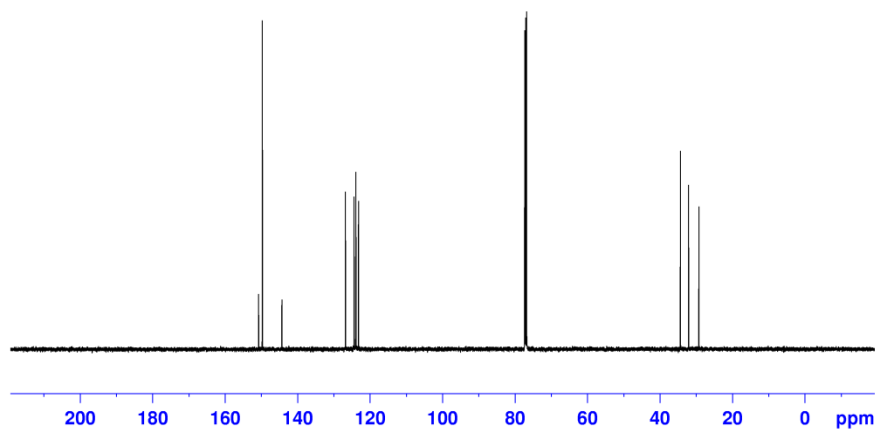

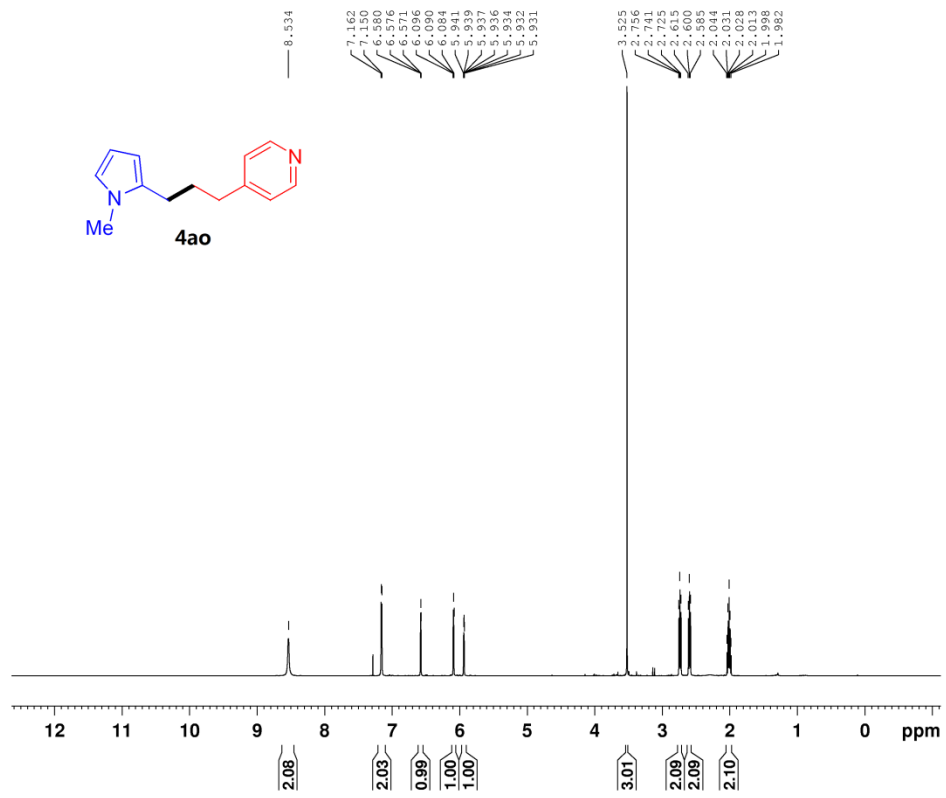

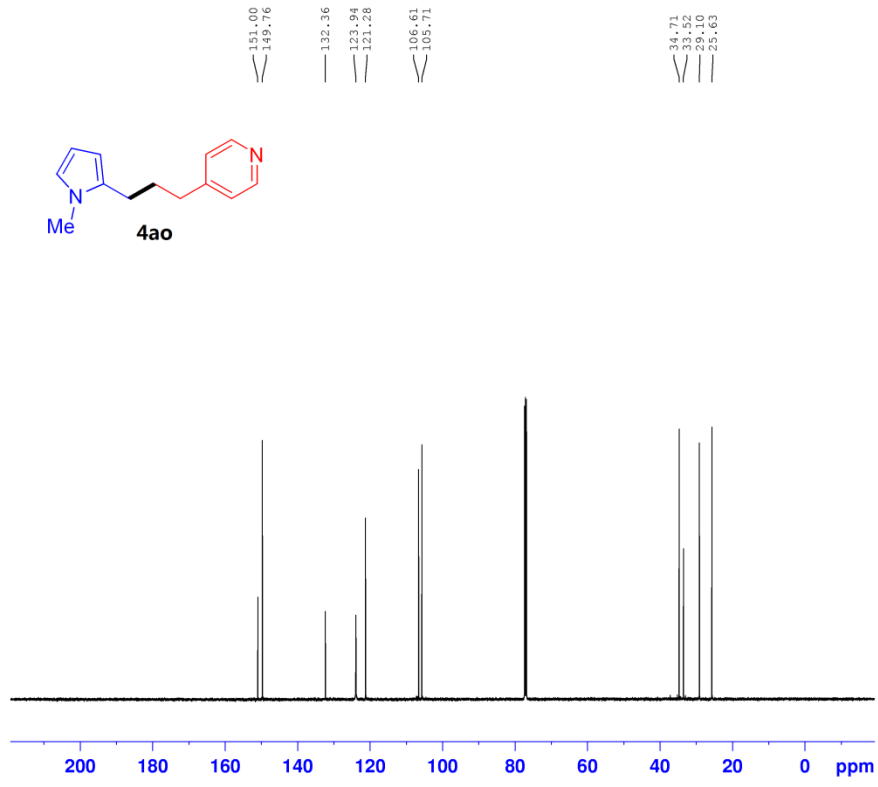



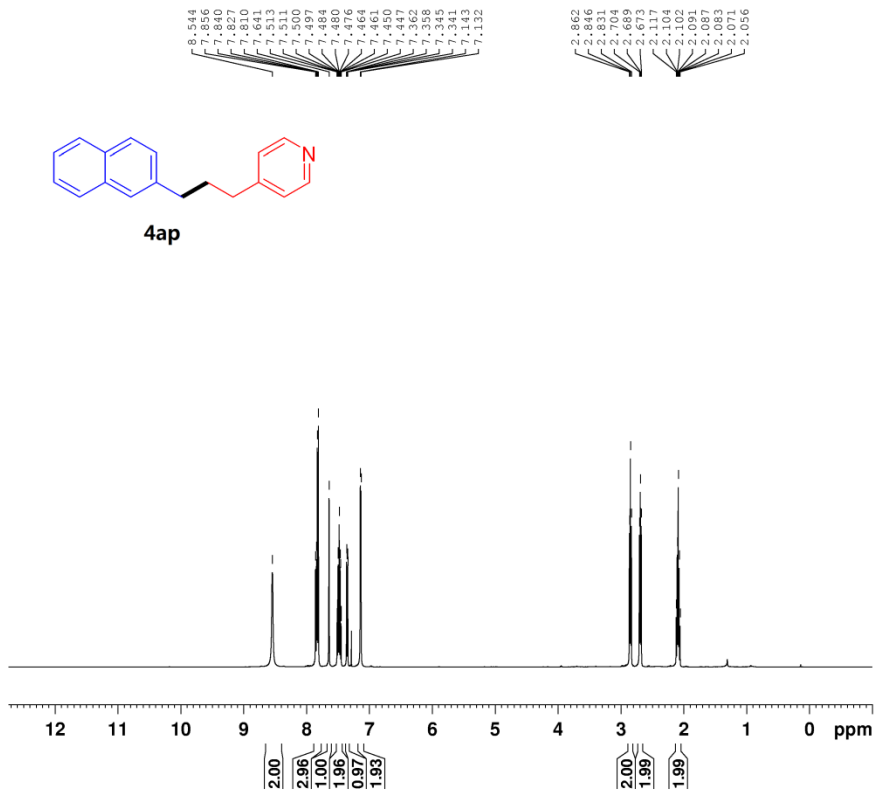

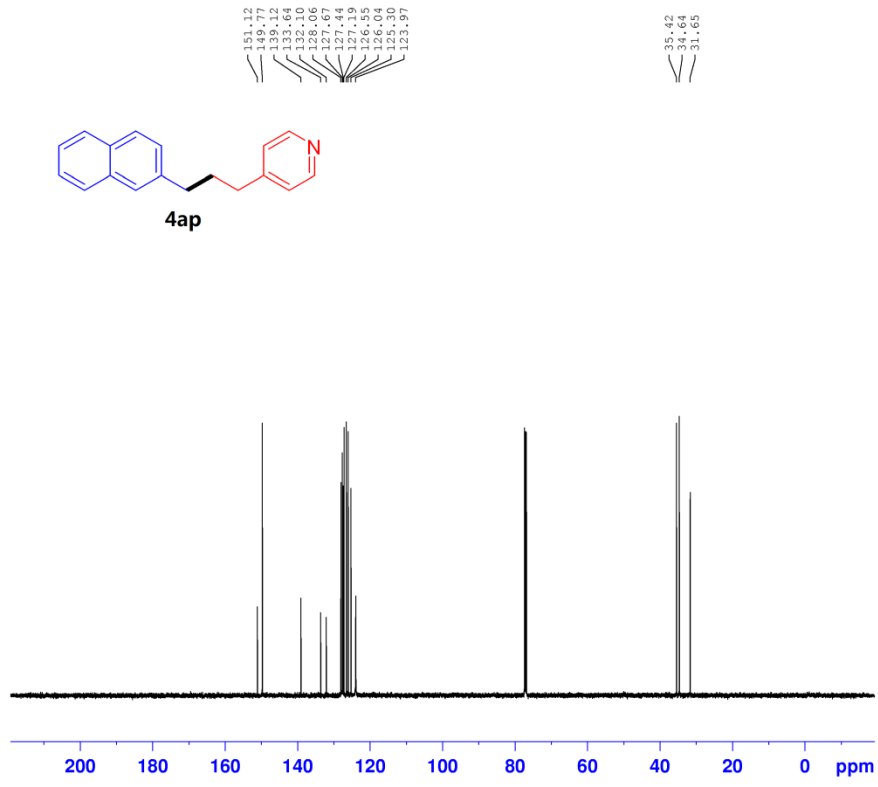

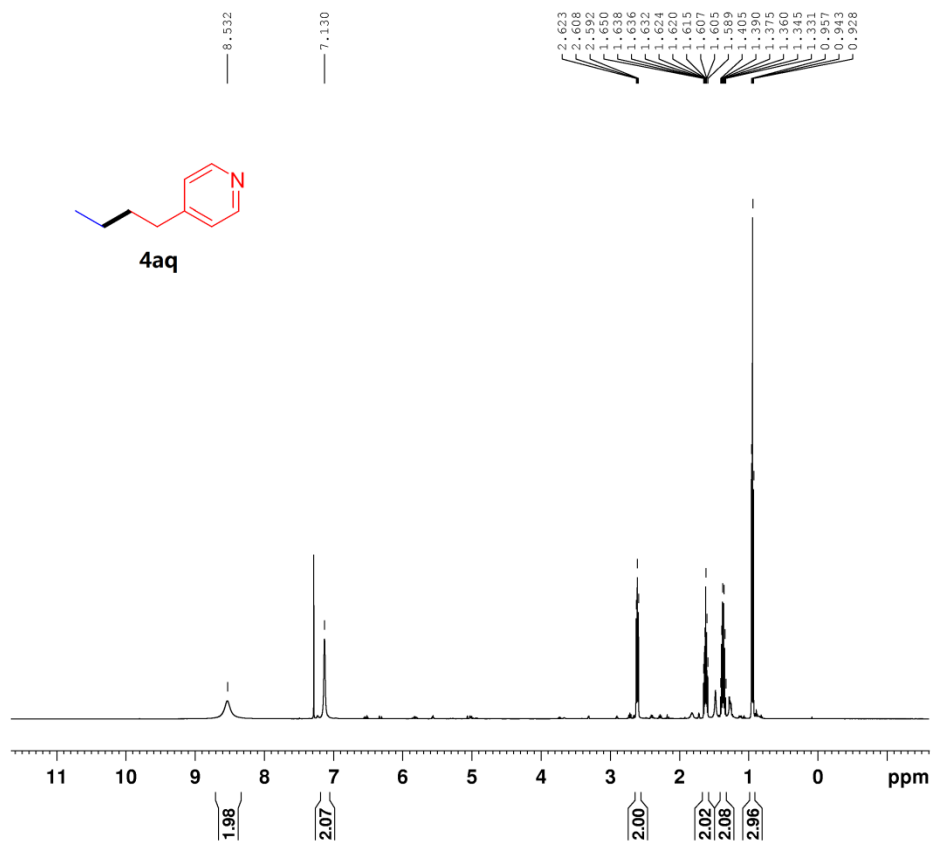

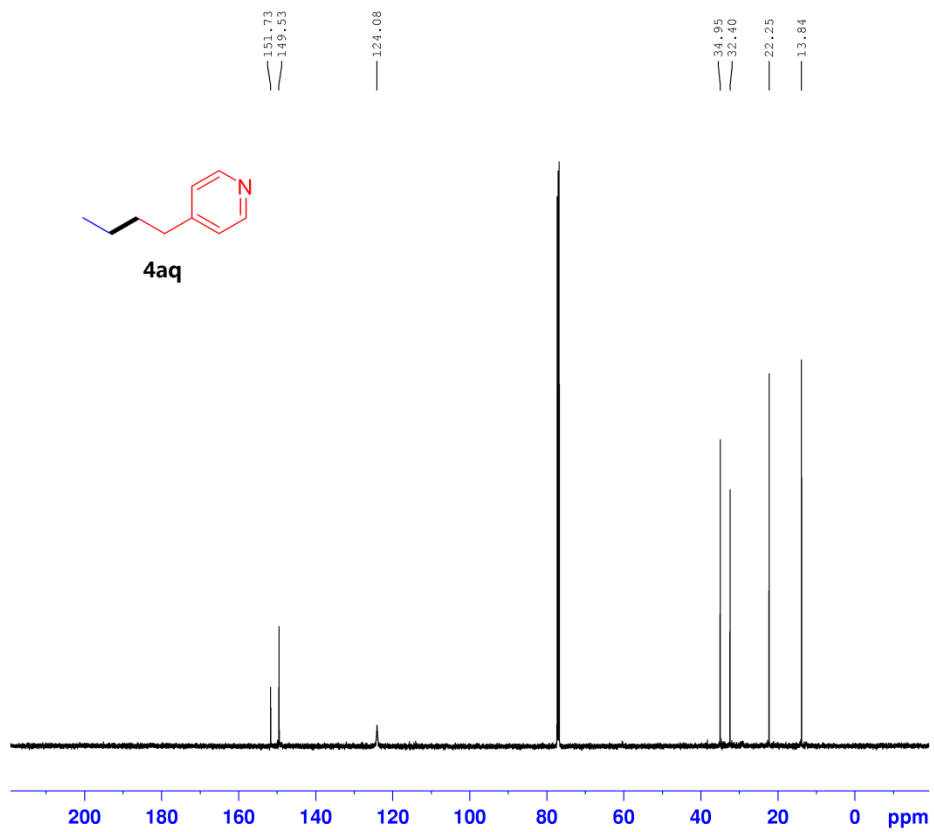

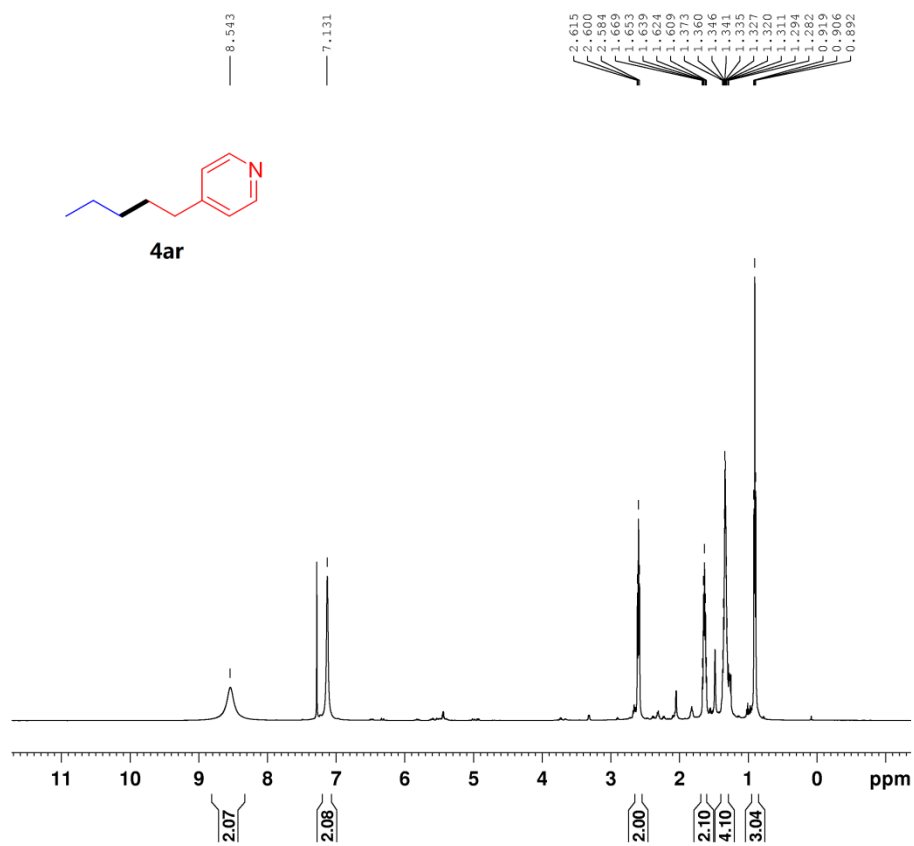

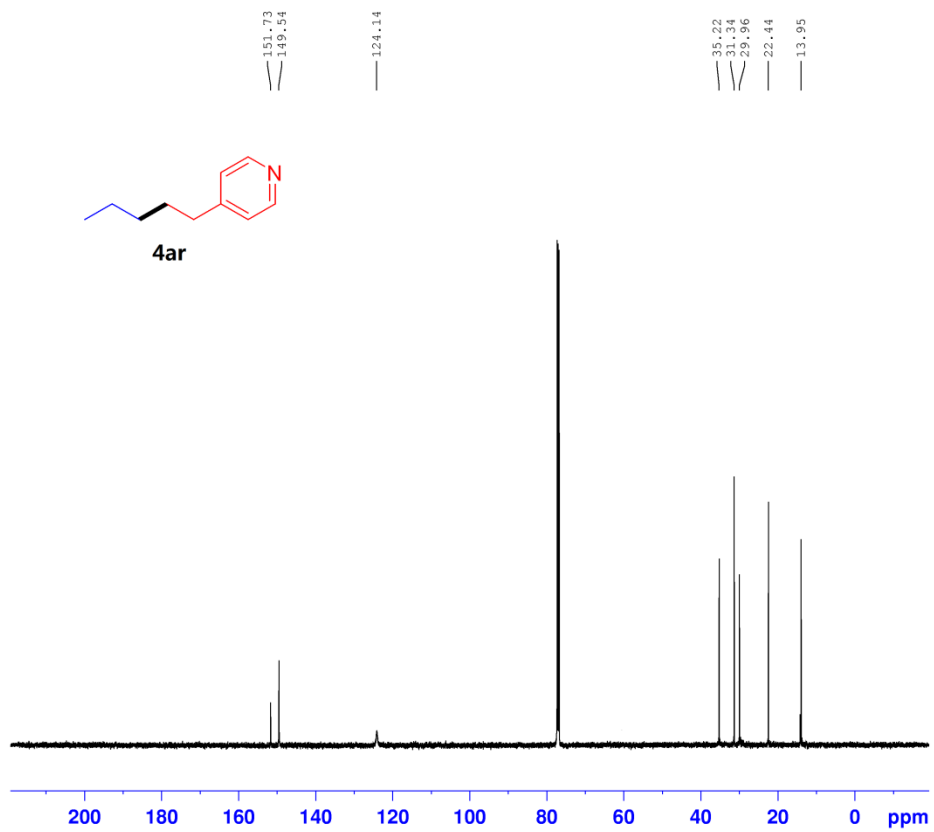

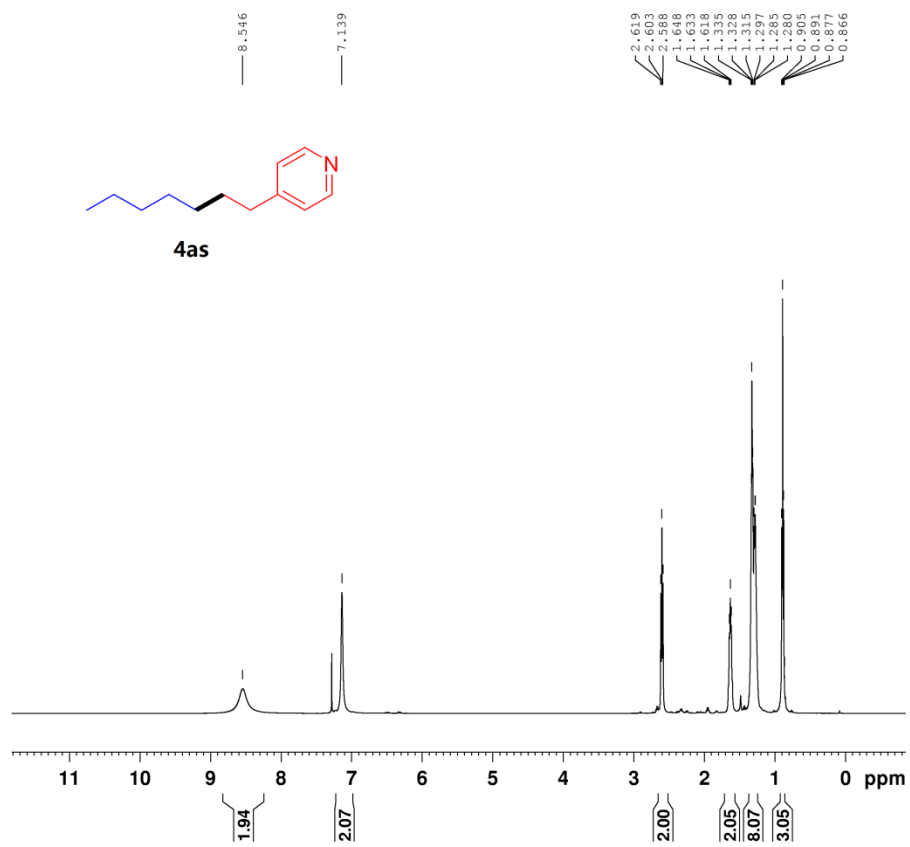

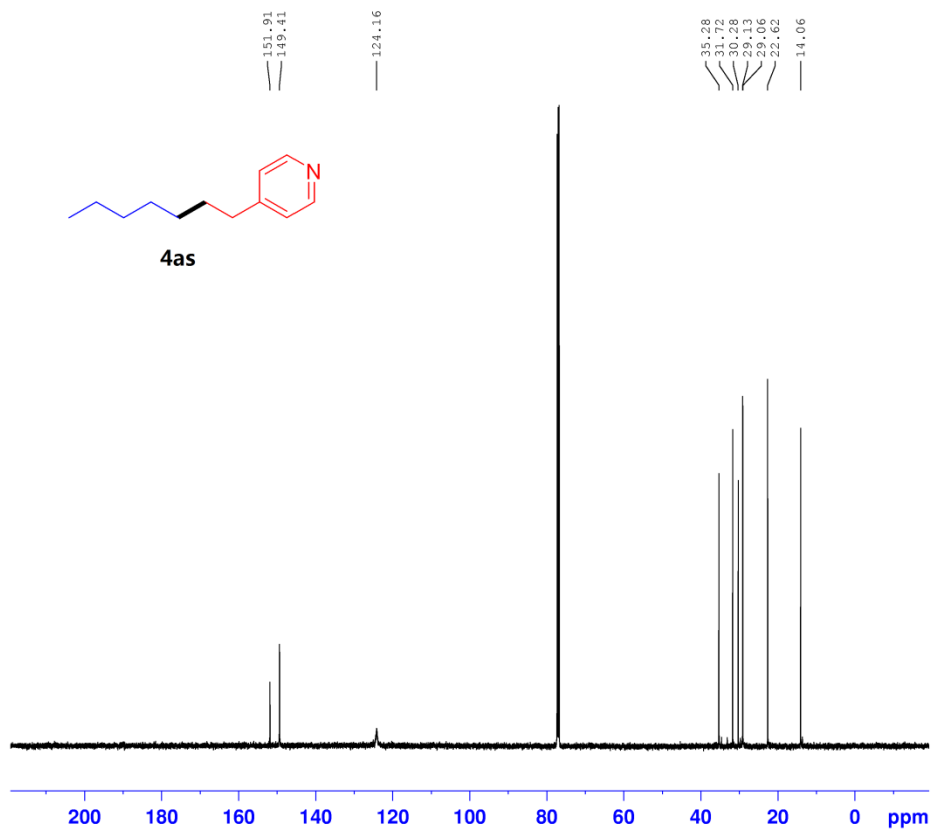



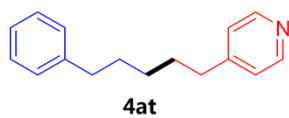

8.533  
7.318  
7.315  
7.303  
7.291  
7.288  
7.284  
7.223  
7.220  
7.208  
7.204  
7.199  
7.196  
7.183  
7.124  
7.115

2.648  
2.634  
2.618  
2.602  
1.714  
1.698  
1.683  
1.667  
1.652  
1.440  
1.428  
1.416  
1.405  
1.394  
1.379

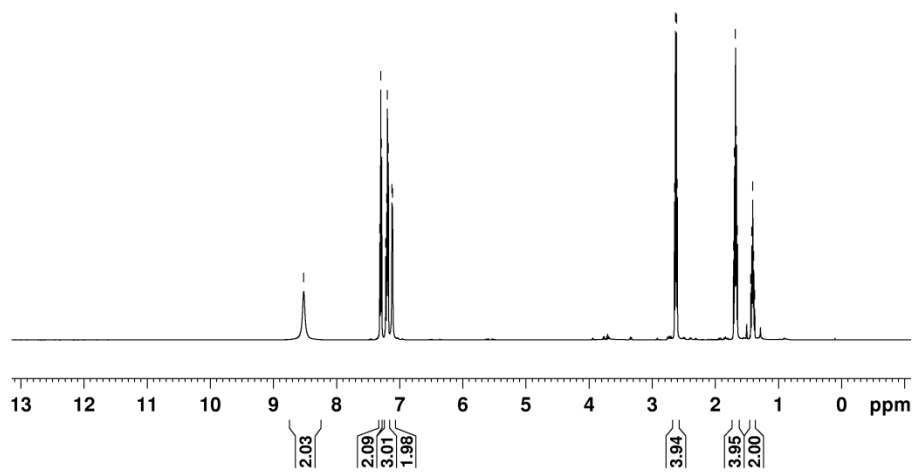

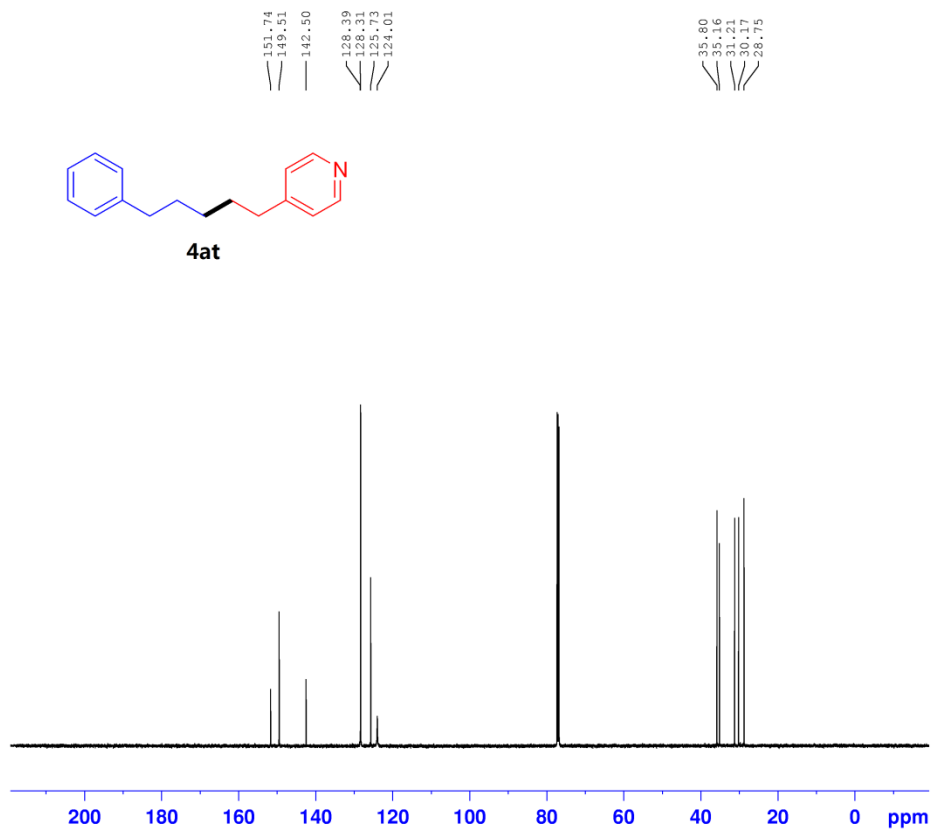

7.314  
7.296  
7.226  
7.211  
7.201  
7.198  
7.184  
7.082  
7.074  
2.116  
2.102  
2.088  
2.674  
2.596  
2.583  
2.576  
2.567  
2.552  
2.552  
2.546  
2.532  
1.676  
1.667  
1.660  
1.652  
1.644  
1.644  
1.641  
1.632  
1.629  
1.625  
1.619  
1.613  
1.608  
1.597  
1.593  
1.585  
1.580  
1.573  
1.567  
1.550  
1.535  
1.547  
1.541  
1.537  
1.537  
1.328  
1.322  
1.319  
1.310  
1.305  
1.298  
1.291  
1.286  
1.280  
1.267  
1.243  
1.243  
1.237  
1.231  
1.223  
1.219  
1.211  
1.204

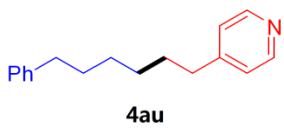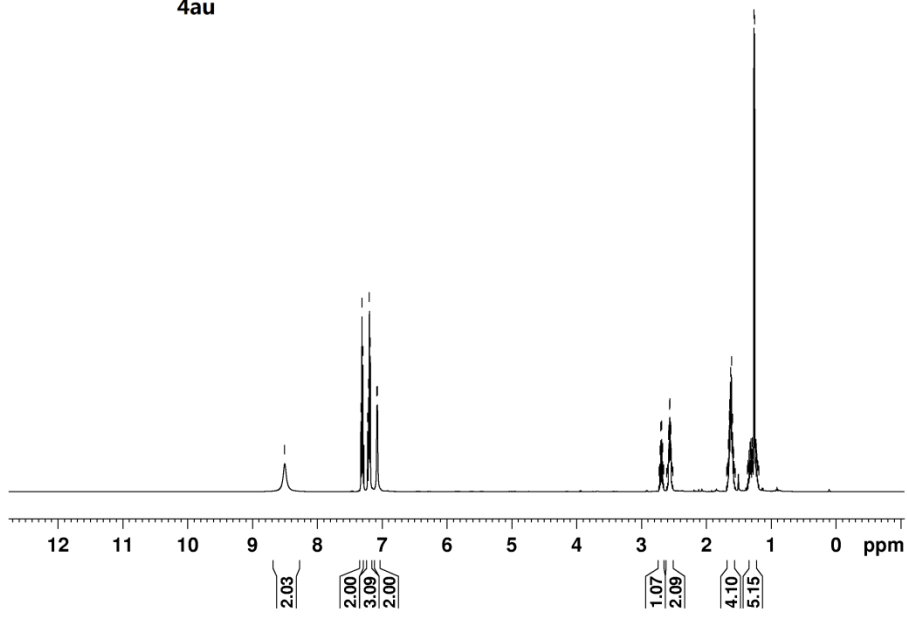

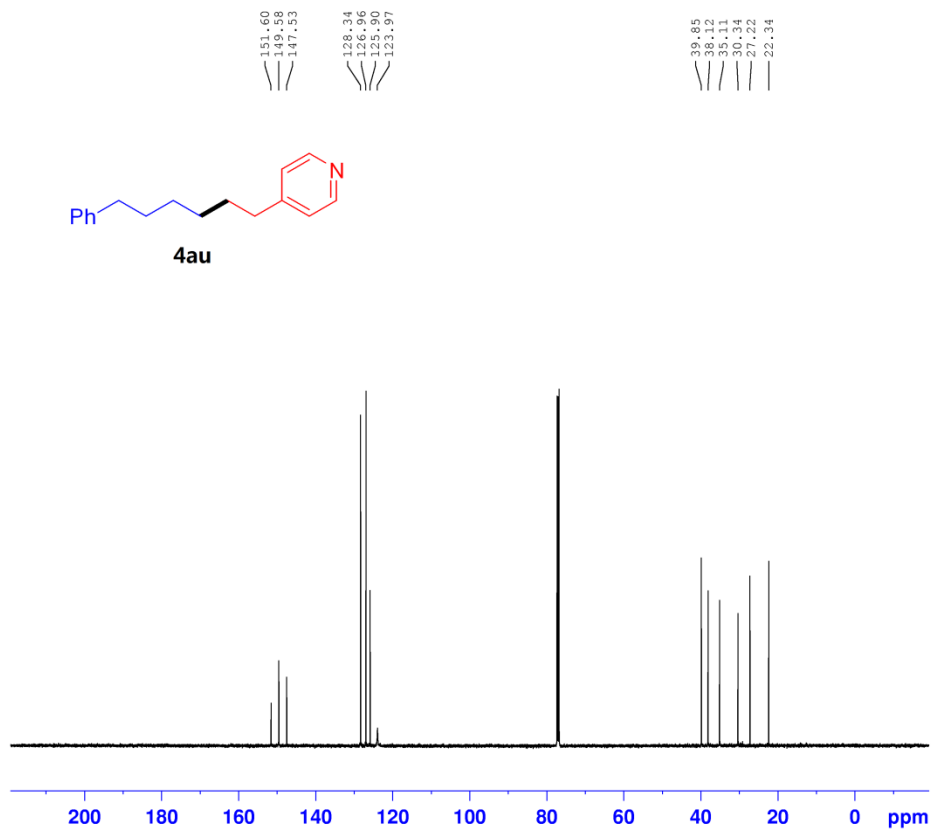

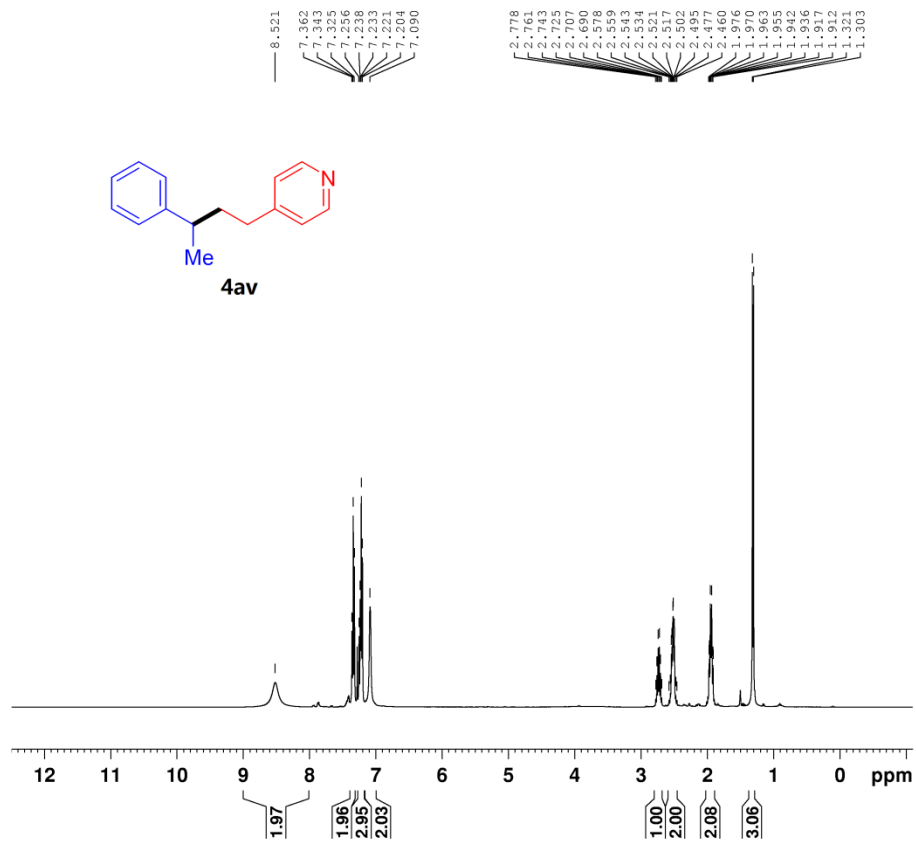

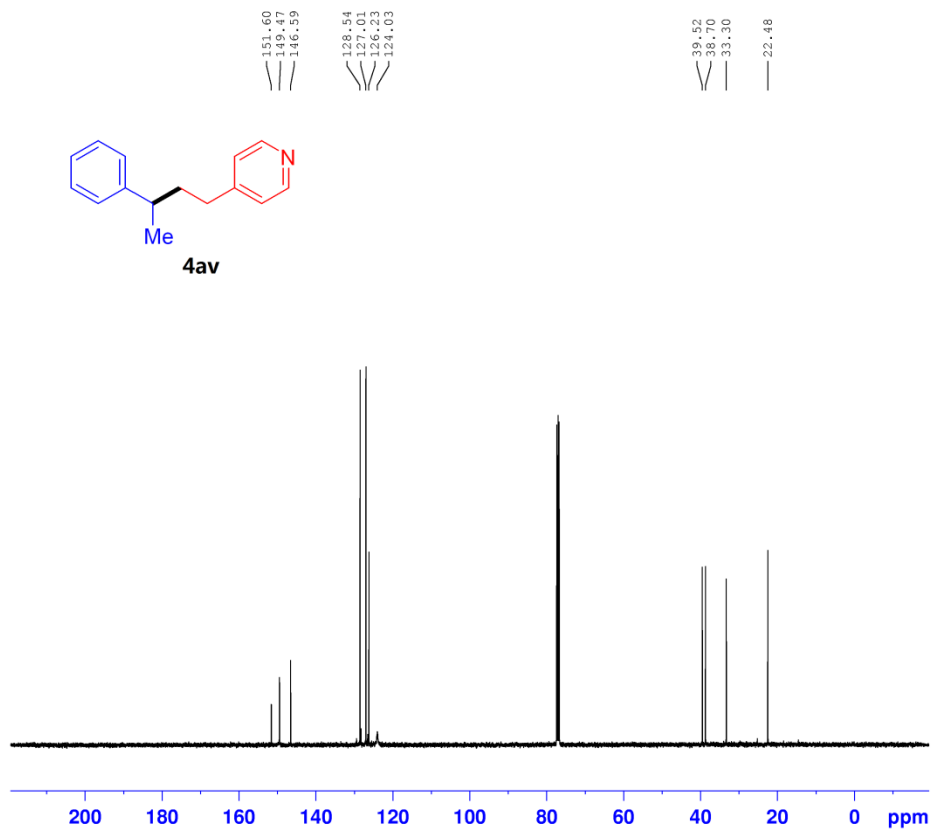

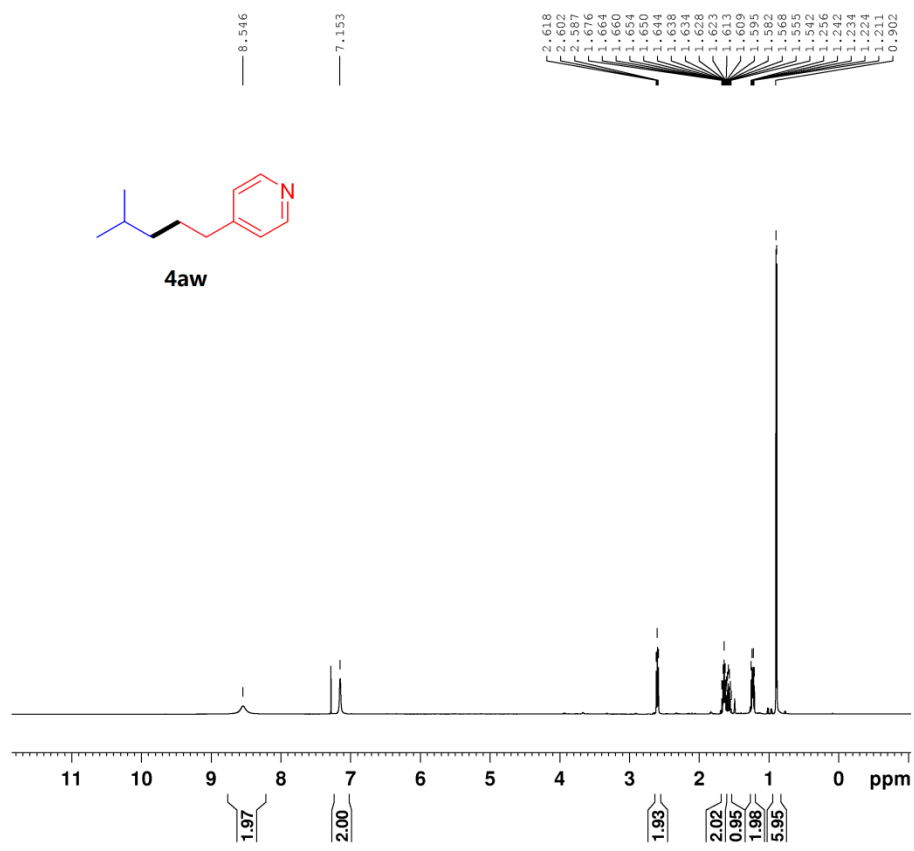

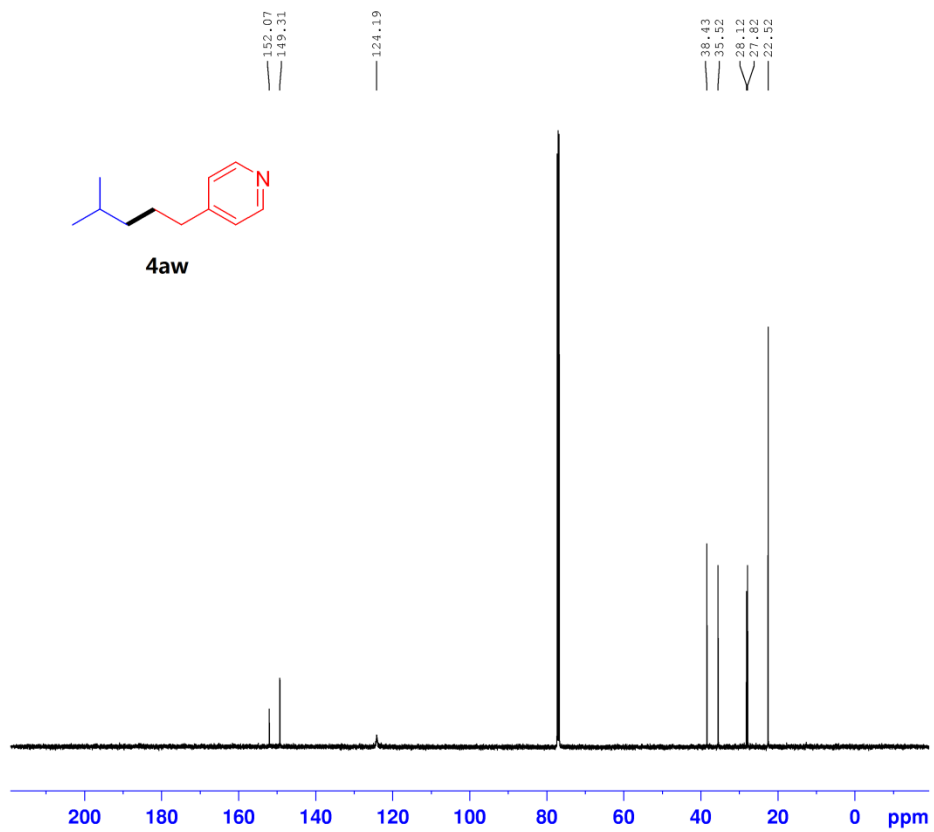



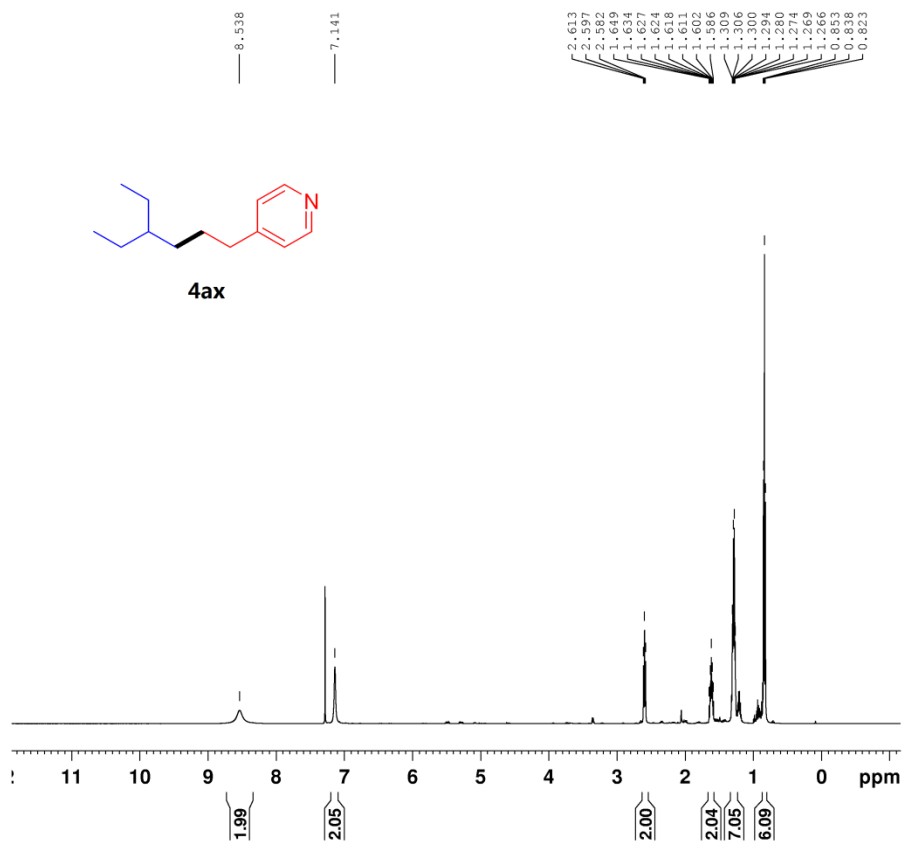

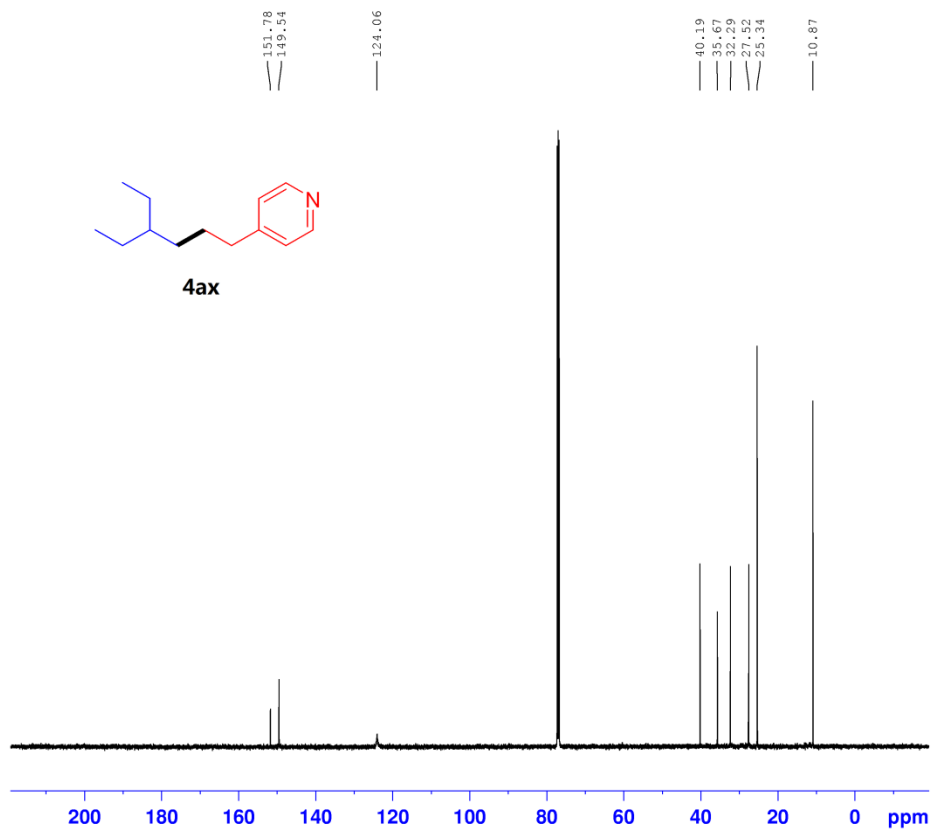

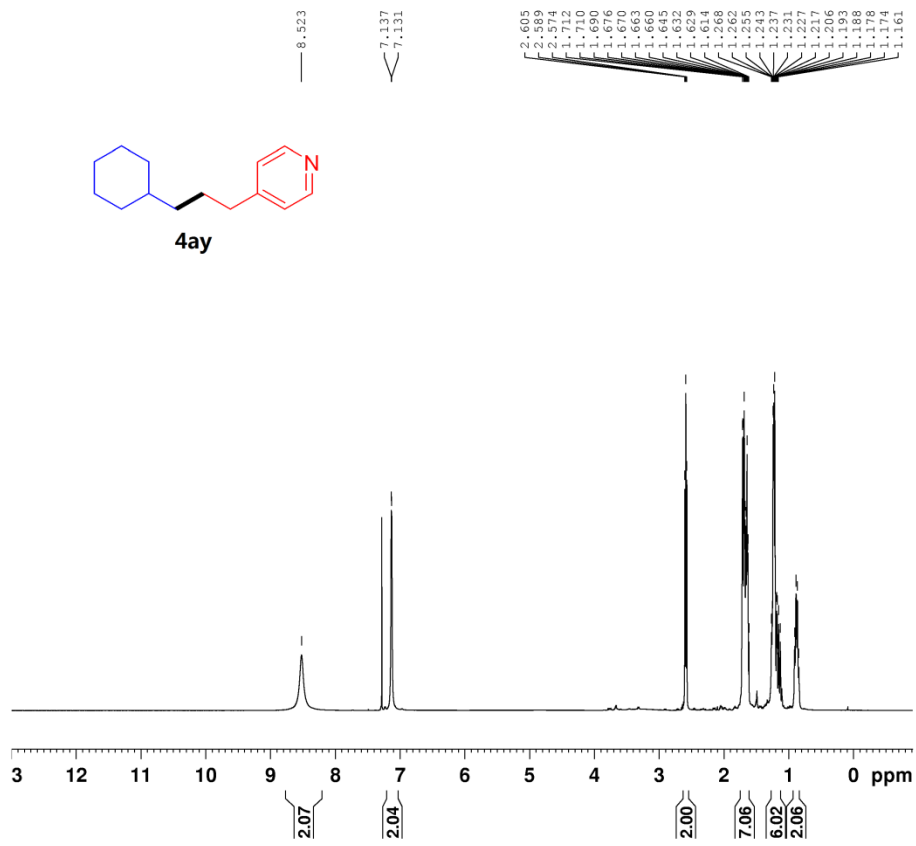

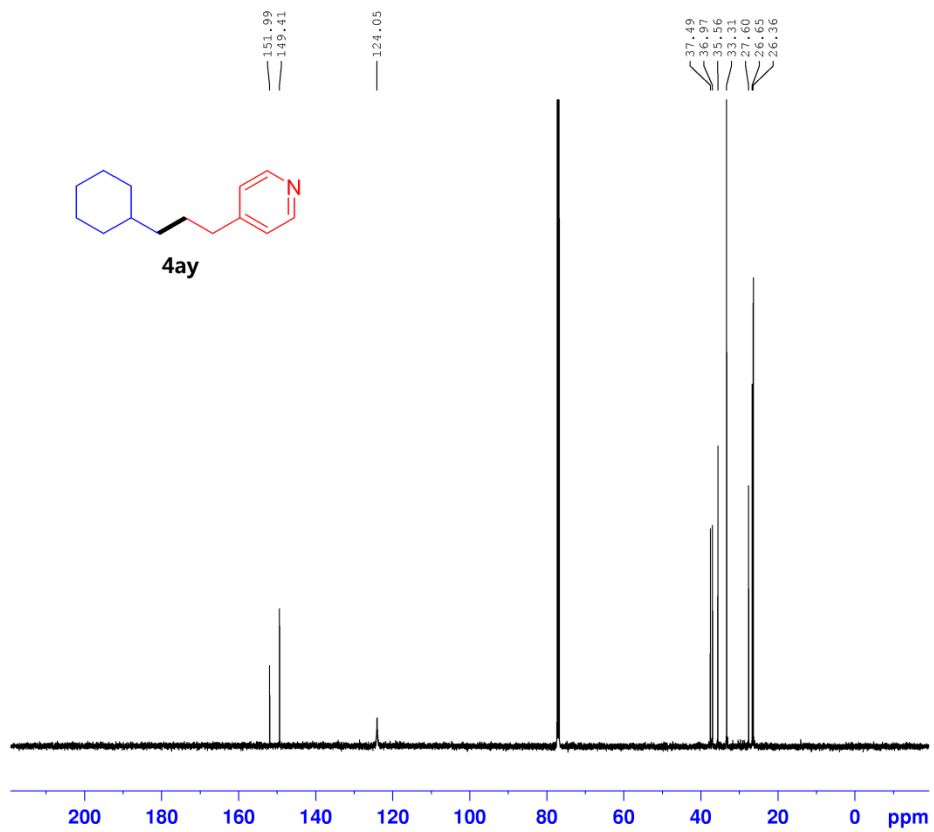

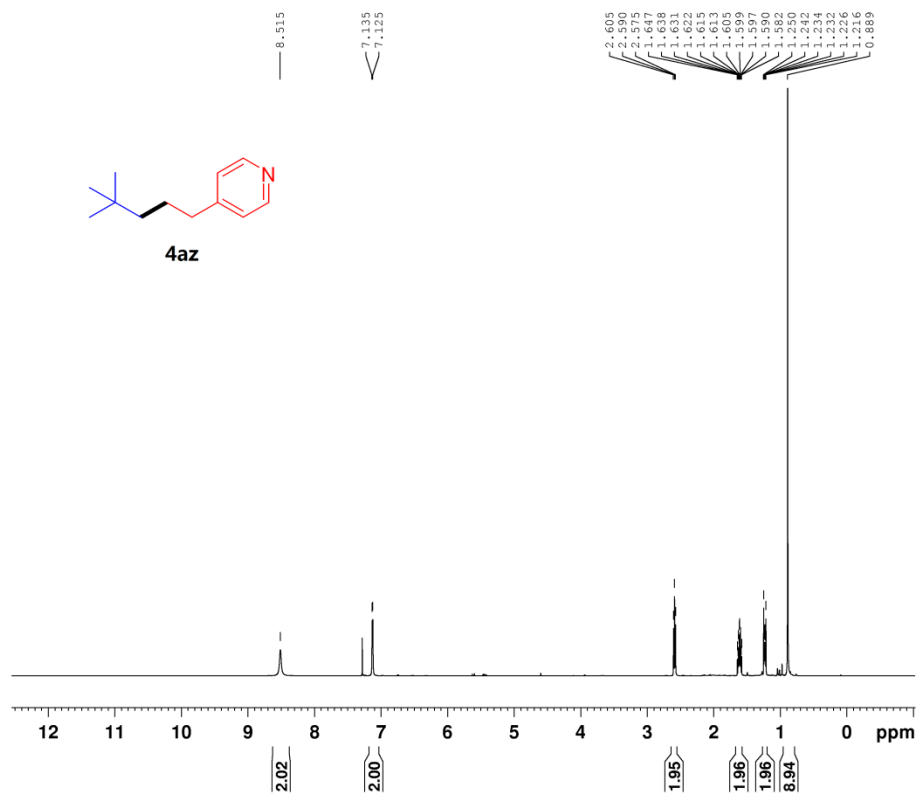

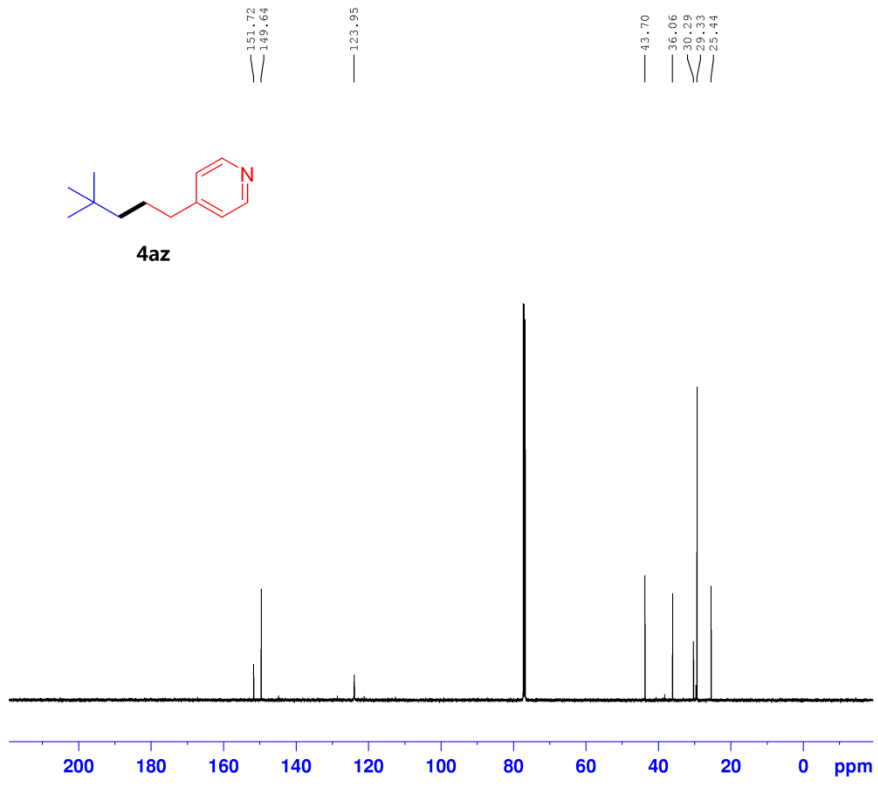

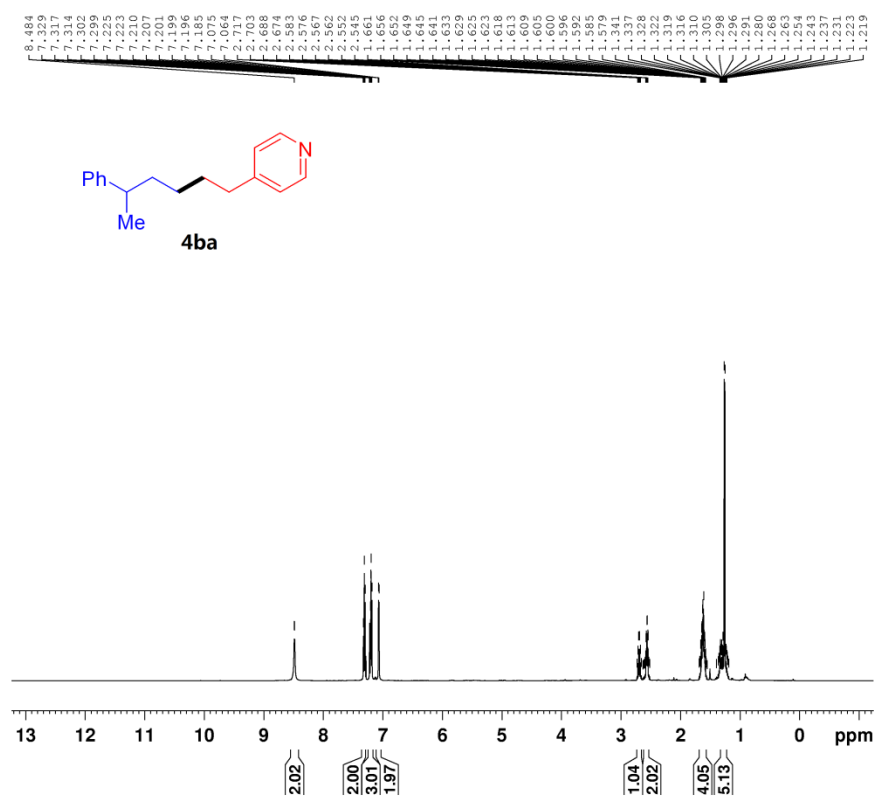

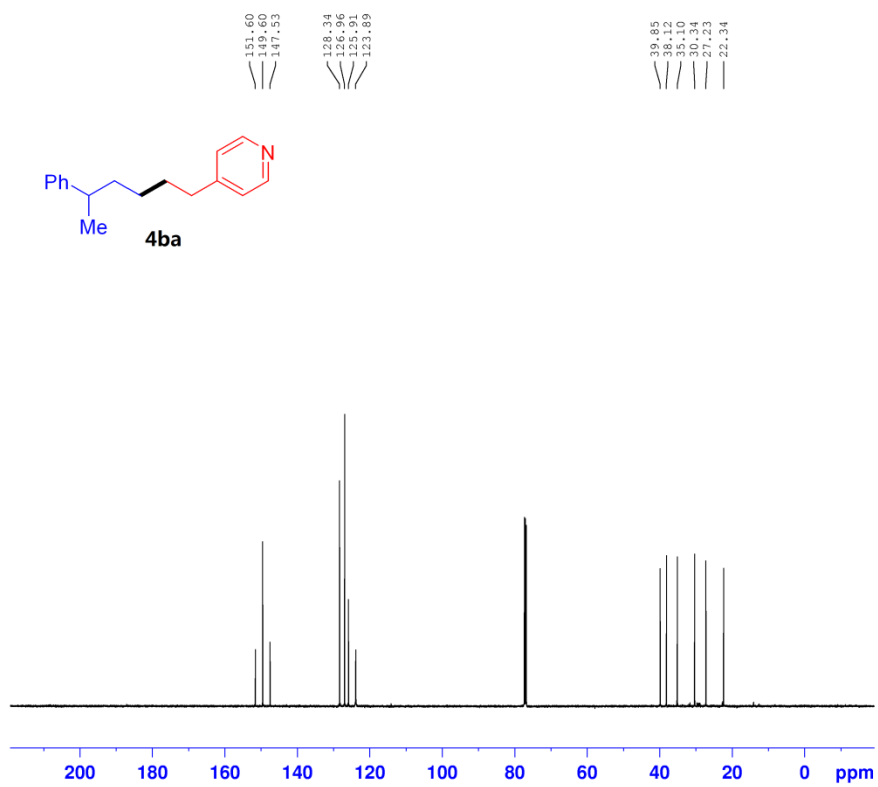



8.537  
8.528  
7.272  
7.256  
7.237  
7.229  
7.203  
7.194  
7.190  
7.184  
7.172  
7.156  
7.156  
7.150  
7.140  
7.110  
7.100  
7.090  
7.080  
7.070  
7.060  
7.050  
7.040  
7.030  
7.020  
7.010  
7.000  
6.990  
6.980  
6.970  
6.960  
6.950  
6.940  
6.930  
6.920  
6.910  
6.900  
6.890  
6.880  
6.870  
6.860  
6.850  
6.840  
6.830  
6.820  
6.810  
6.800  
6.790  
6.780  
6.770  
6.760  
6.750  
6.740  
6.730  
6.720  
6.710  
6.700  
6.690  
6.680  
6.670  
6.660  
6.650  
6.640  
6.630  
6.620  
6.610  
6.600  
6.590  
6.580  
6.570  
6.560  
6.550  
6.540  
6.530  
6.520  
6.510  
6.500  
6.490  
6.480  
6.470  
6.460  
6.450  
6.440  
6.430  
6.420  
6.410  
6.400  
6.390  
6.380  
6.370  
6.360  
6.350  
6.340  
6.330  
6.320  
6.310  
6.300  
6.290  
6.280  
6.270  
6.260  
6.250  
6.240  
6.230  
6.220  
6.210  
6.200  
6.190  
6.180  
6.170  
6.160  
6.150  
6.140  
6.130  
6.120  
6.110  
6.100  
6.090  
6.080  
6.070  
6.060  
6.050  
6.040  
6.030  
6.020  
6.010  
6.000  
5.990  
5.980  
5.970  
5.960  
5.950  
5.940  
5.930  
5.920  
5.910  
5.900  
5.890  
5.880  
5.870  
5.860  
5.850  
5.840  
5.830  
5.820  
5.810  
5.800  
5.790  
5.780  
5.770  
5.760  
5.750  
5.740  
5.730  
5.720  
5.710  
5.700  
5.690  
5.680  
5.670  
5.660  
5.650  
5.640  
5.630  
5.620  
5.610  
5.600  
5.590  
5.580  
5.570  
5.560  
5.550  
5.540  
5.530  
5.520  
5.510  
5.500  
5.490  
5.480  
5.470  
5.460  
5.450  
5.440  
5.430  
5.420  
5.410  
5.400  
5.390  
5.380  
5.370  
5.360  
5.350  
5.340  
5.330  
5.320  
5.310  
5.300  
5.290  
5.280  
5.270  
5.260  
5.250  
5.240  
5.230  
5.220  
5.210  
5.200  
5.190  
5.180  
5.170  
5.160  
5.150  
5.140  
5.130  
5.120  
5.110  
5.100  
5.090  
5.080  
5.070  
5.060  
5.050  
5.040  
5.030  
5.020  
5.010  
5.000  
4.990  
4.980  
4.970  
4.960  
4.950  
4.940  
4.930  
4.920  
4.910  
4.900  
4.890  
4.880  
4.870  
4.860  
4.850  
4.840  
4.830  
4.820  
4.810  
4.800  
4.790  
4.780  
4.770  
4.760  
4.750  
4.740  
4.730  
4.720  
4.710  
4.700  
4.690  
4.680  
4.670  
4.660  
4.650  
4.640  
4.630  
4.620  
4.610  
4.600  
4.590  
4.580  
4.570  
4.560  
4.550  
4.540  
4.530  
4.520  
4.510  
4.500  
4.490  
4.480  
4.470  
4.460  
4.450  
4.440  
4.430  
4.420  
4.410  
4.400  
4.390  
4.380  
4.370  
4.360  
4.350  
4.340  
4.330  
4.320  
4.310  
4.300  
4.290  
4.280  
4.270  
4.260  
4.250  
4.240  
4.230  
4.220  
4.210  
4.200  
4.190  
4.180  
4.170  
4.160  
4.150  
4.140  
4.130  
4.120  
4.110  
4.100  
4.090  
4.080  
4.070  
4.060  
4.050  
4.040  
4.030  
4.020  
4.010  
4.000  
3.990  
3.980  
3.970  
3.960  
3.950  
3.940  
3.930  
3.920  
3.910  
3.900  
3.890  
3.880  
3.870  
3.860  
3.850  
3.840  
3.830  
3.820  
3.810  
3.800  
3.790  
3.780  
3.770  
3.760  
3.750  
3.740  
3.730  
3.720  
3.710  
3.700  
3.690  
3.680  
3.670  
3.660  
3.650  
3.640  
3.630  
3.620  
3.610  
3.600  
3.590  
3.580  
3.570  
3.560  
3.550  
3.540  
3.530  
3.520  
3.510  
3.500  
3.490  
3.480  
3.470  
3.460  
3.450  
3.440  
3.430  
3.420  
3.410  
3.400  
3.390  
3.380  
3.370  
3.360  
3.350  
3.340  
3.330  
3.320  
3.310  
3.300  
3.290  
3.280  
3.270  
3.260  
3.250  
3.240  
3.230  
3.220  
3.210  
3.200  
3.190  
3.180  
3.170  
3.160  
3.150  
3.140  
3.130  
3.120  
3.110  
3.100  
3.090  
3.080  
3.070  
3.060  
3.050  
3.040  
3.030  
3.020  
3.010  
3.000  
2.990  
2.980  
2.970  
2.960  
2.950  
2.940  
2.930  
2.920  
2.910  
2.900  
2.890  
2.880  
2.870  
2.860  
2.850  
2.840  
2.830  
2.820  
2.810  
2.800  
2.790  
2.780  
2.770  
2.760  
2.750  
2.740  
2.730  
2.720  
2.710  
2.700  
2.690  
2.680  
2.670  
2.660  
2.650  
2.640  
2.630  
2.620  
2.610  
2.600  
2.590  
2.580  
2.570  
2.560  
2.550  
2.540  
2.530  
2.520  
2.510  
2.500  
2.490  
2.480  
2.470  
2.460  
2.450  
2.440  
2.430  
2.420  
2.410  
2.400  
2.390  
2.380  
2.370  
2.360  
2.350  
2.340  
2.330  
2.320  
2.310  
2.300  
2.290  
2.280  
2.270  
2.260  
2.250  
2.240  
2.230  
2.220  
2.210  
2.200  
2.190  
2.180  
2.170  
2.160  
2.150  
2.140  
2.130  
2.120  
2.110  
2.100  
2.090  
2.080  
2.070  
2.060  
2.050  
2.040  
2.030  
2.020  
2.010  
2.000  
1.990  
1.980  
1.970  
1.960  
1.950  
1.940  
1.930  
1.920  
1.910  
1.900  
1.890  
1.880  
1.870  
1.860  
1.850  
1.840  
1.830  
1.820  
1.810  
1.800  
1.790  
1.780  
1.770  
1.760  
1.750  
1.740  
1.730  
1.720  
1.710  
1.700  
1.690  
1.680  
1.670  
1.660  
1.650  
1.640  
1.630  
1.620  
1.610  
1.600  
1.590  
1.580  
1.570  
1.560  
1.550  
1.540  
1.530  
1.520  
1.510  
1.500  
1.490  
1.480  
1.470  
1.460  
1.450  
1.440  
1.430  
1.420  
1.410  
1.400  
1.390  
1.380  
1.370  
1.360  
1.350  
1.340  
1.330  
1.320  
1.310  
1.300  
1.290  
1.280  
1.270  
1.260  
1.250  
1.240  
1.230  
1.220  
1.210  
1.200  
1.190  
1.180  
1.170  
1.160  
1.150  
1.140  
1.130  
1.120  
1.110  
1.100  
1.090  
1.080  
1.070  
1.060  
1.050  
1.040  
1.030  
1.020  
1.010  
1.000  
0.990  
0.980  
0.970  
0.960  
0.950  
0.940  
0.930  
0.920  
0.910  
0.900  
0.890  
0.880  
0.870  
0.860  
0.850  
0.840  
0.830  
0.820  
0.810  
0.800  
0.790  
0.780  
0.770  
0.760  
0.750  
0.740  
0.730  
0.720  
0.710  
0.700  
0.690  
0.680  
0.670  
0.660  
0.650  
0.640  
0.630  
0.620  
0.610  
0.600  
0.590  
0.580  
0.570  
0.560  
0.550  
0.540  
0.530  
0.520  
0.510  
0.500  
0.490  
0.480  
0.470  
0.460  
0.450  
0.440  
0.430  
0.420  
0.410  
0.400  
0.390  
0.380  
0.370  
0.360  
0.350  
0.340  
0.330  
0.320  
0.310  
0.300  
0.290  
0.280  
0.270  
0.260  
0.250  
0.240  
0.230  
0.220  
0.210  
0.200  
0.190  
0.180  
0.170  
0.160  
0.150  
0.140  
0.130  
0.120  
0.110  
0.100  
0.090  
0.080  
0.070  
0.060  
0.050  
0.040  
0.030  
0.020  
0.010  
0.000

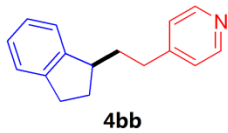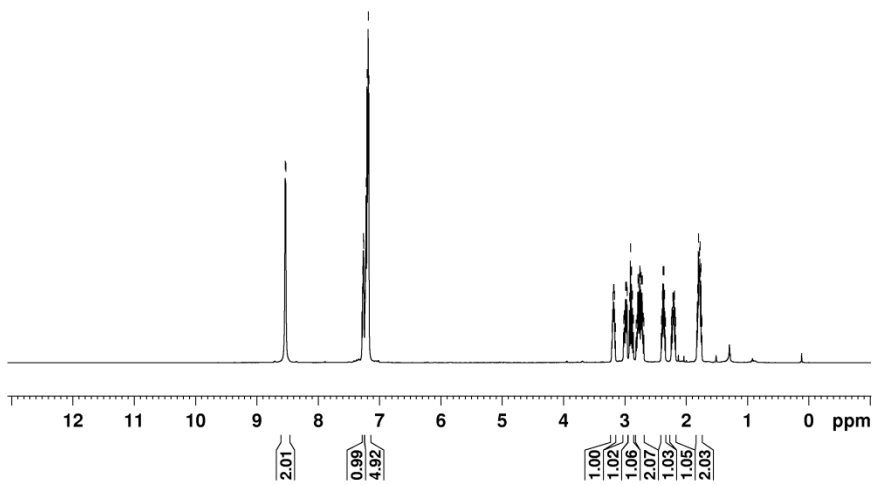

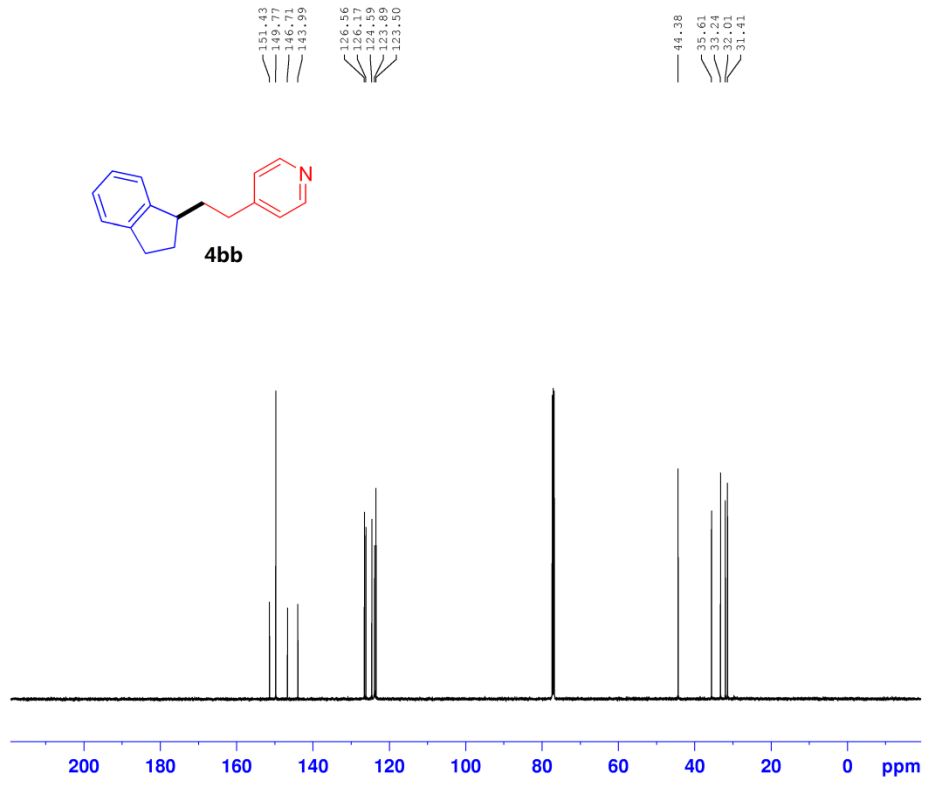

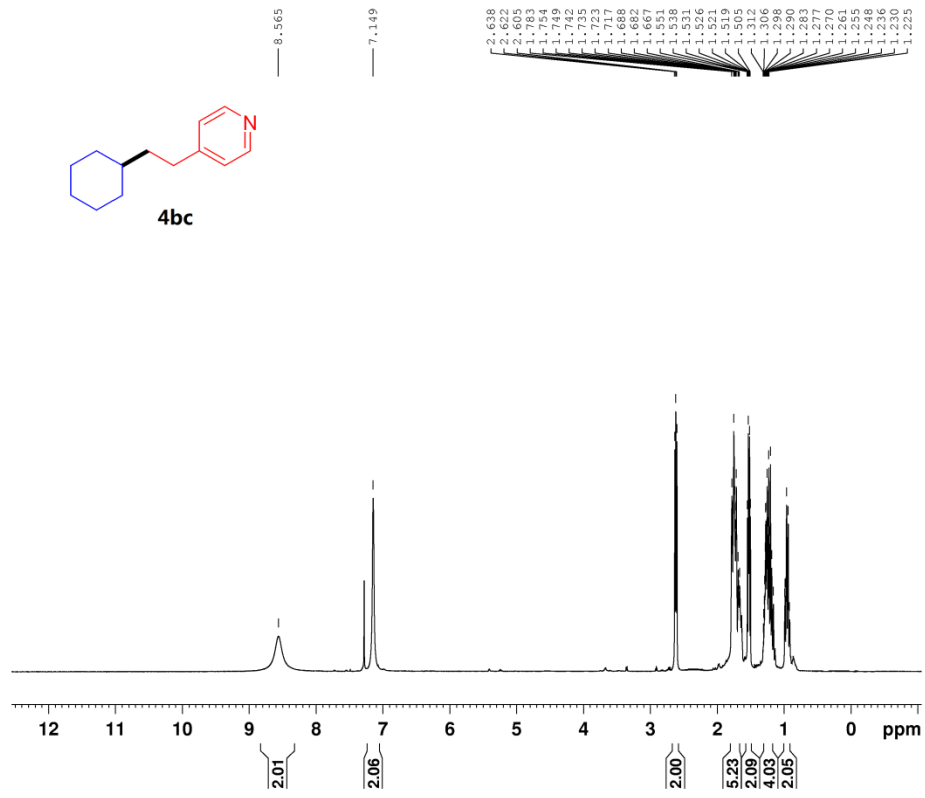

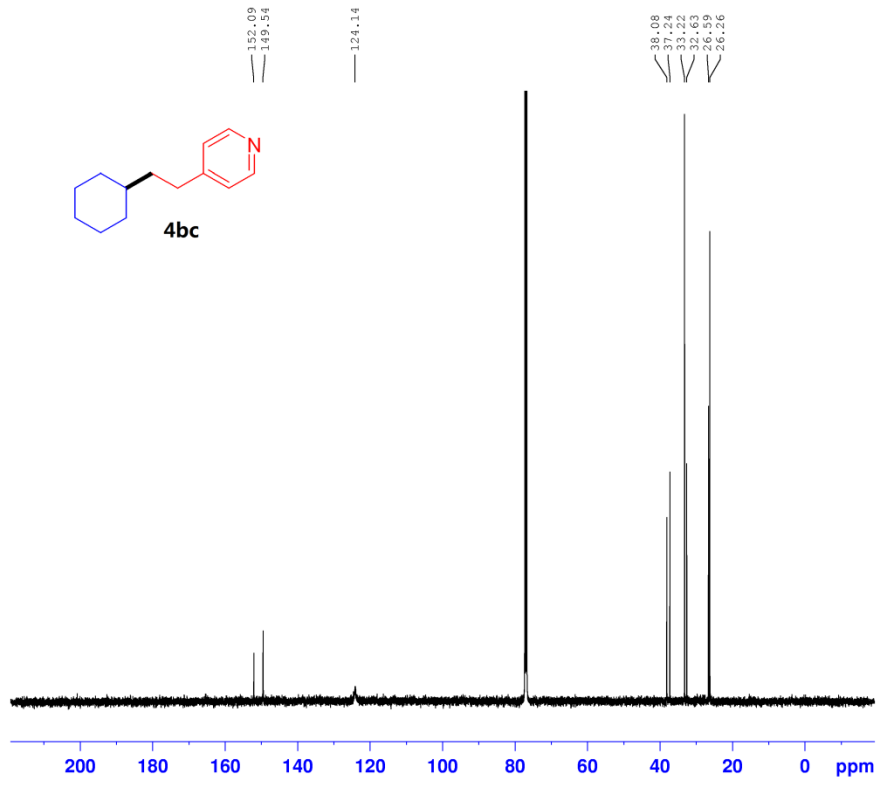

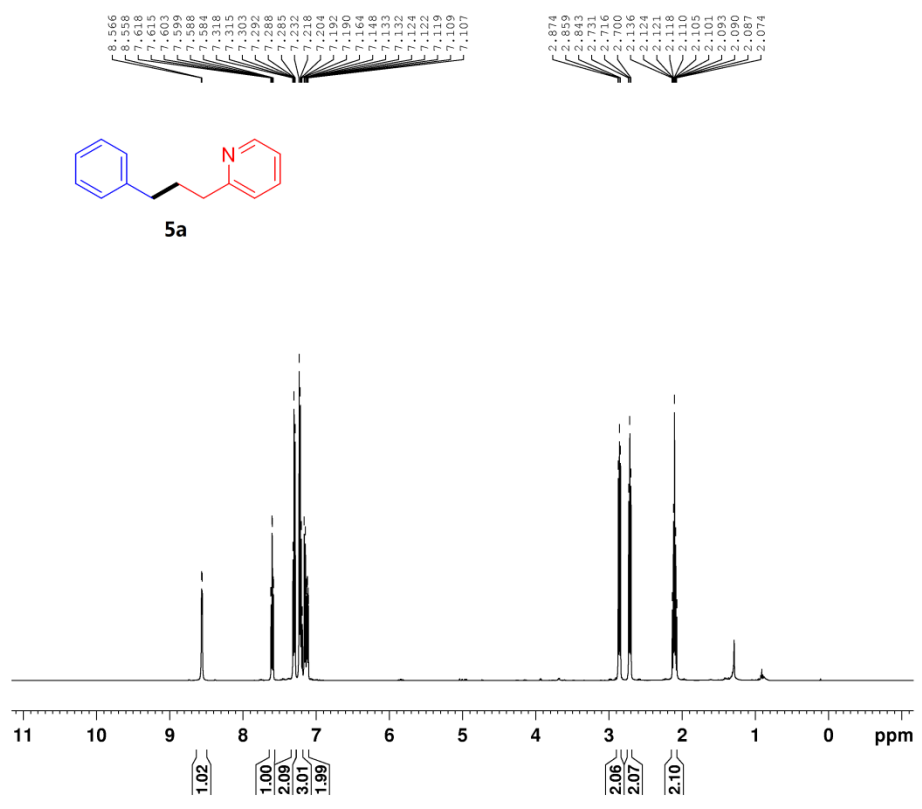

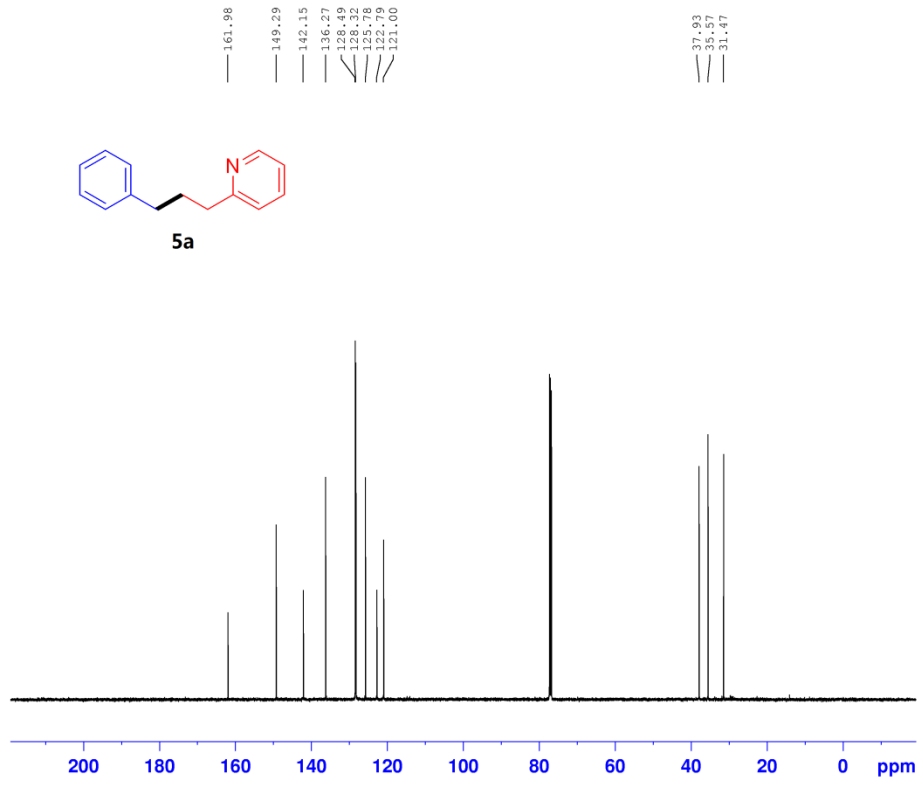

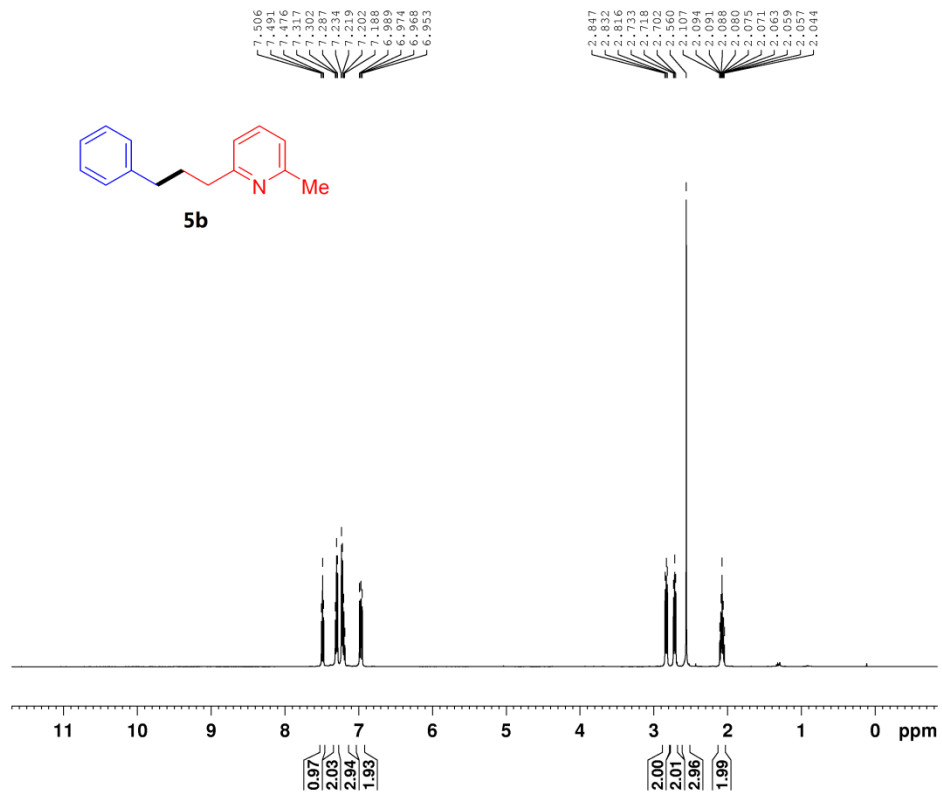

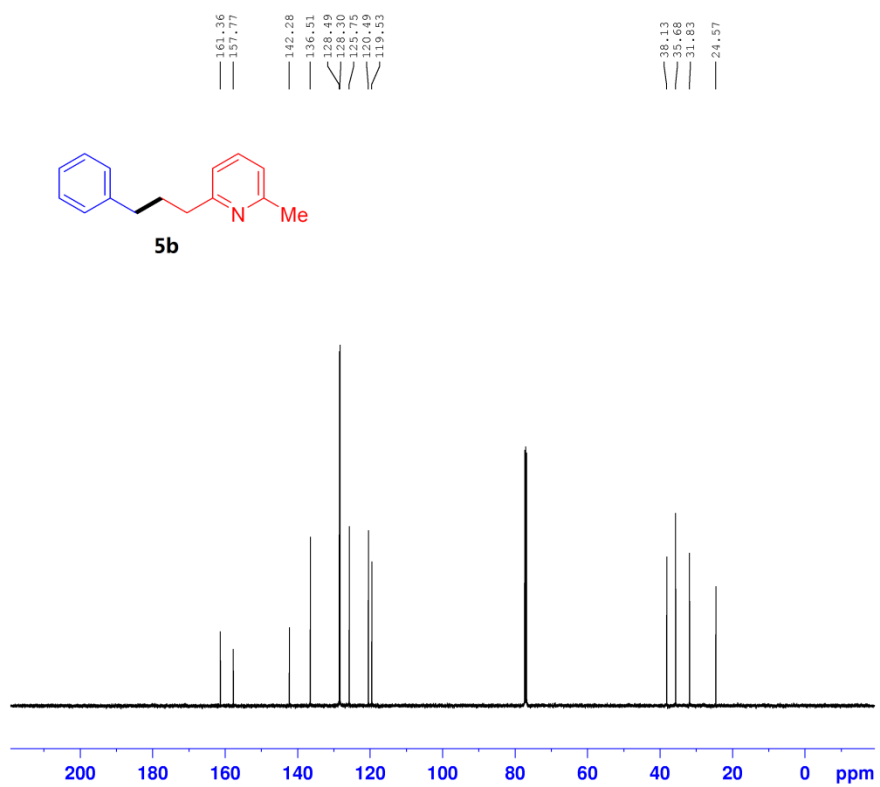



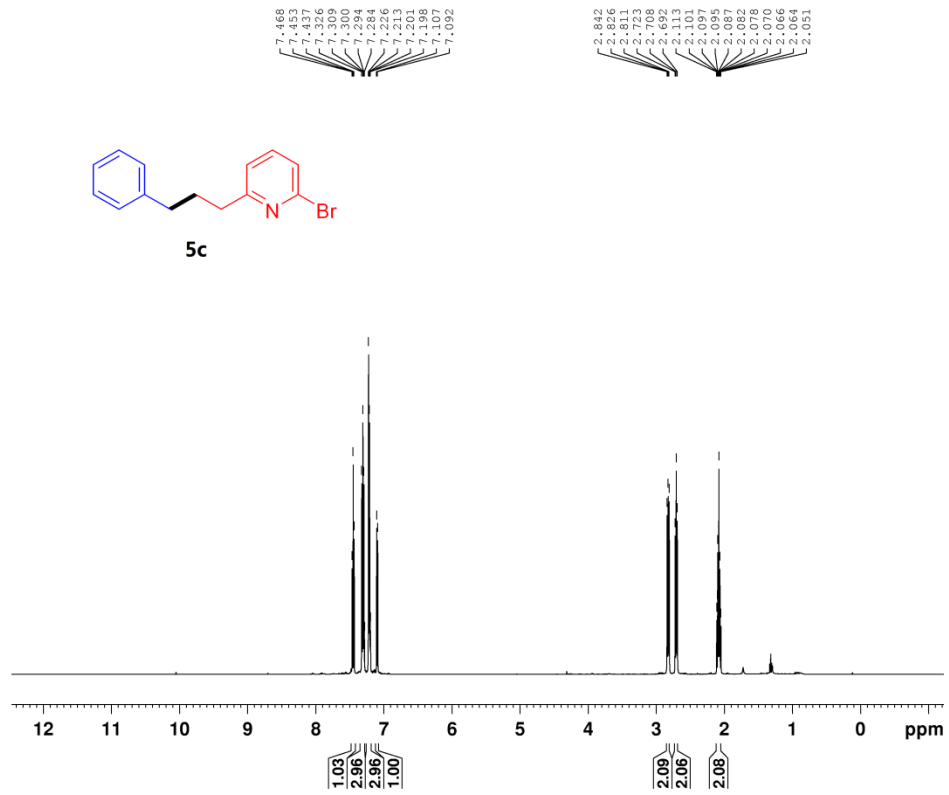

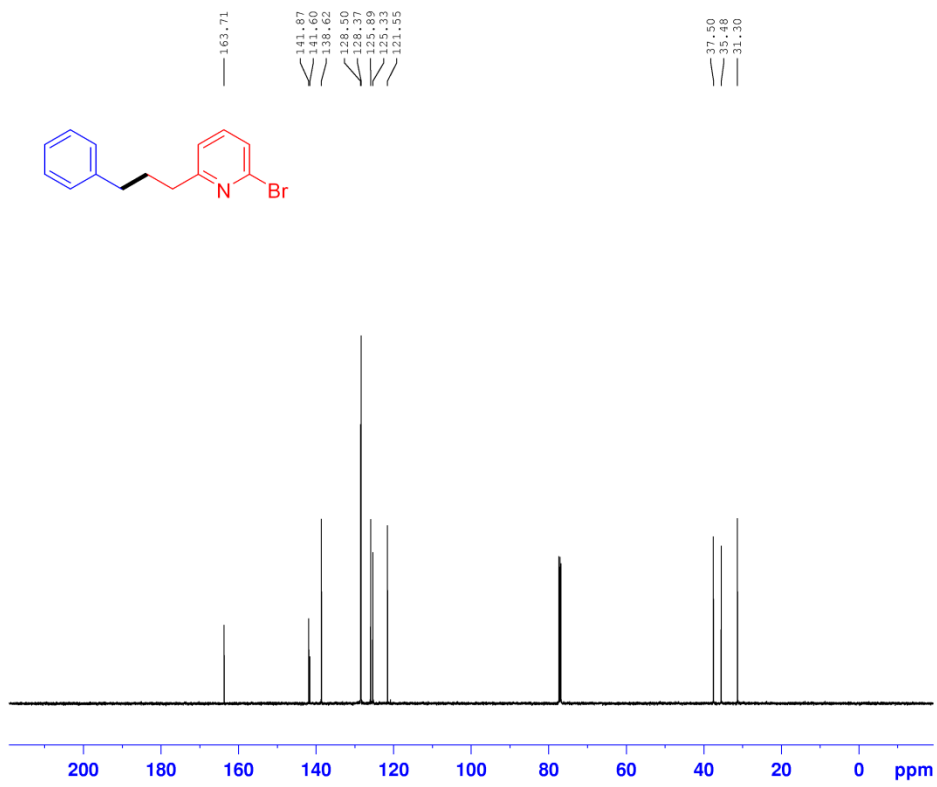

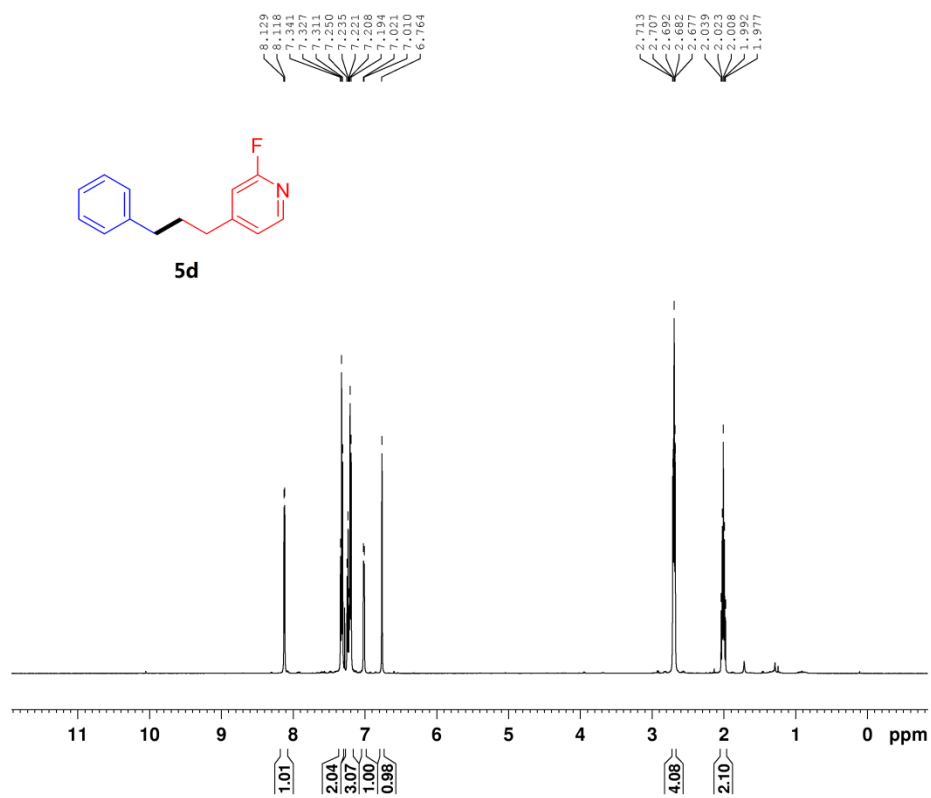

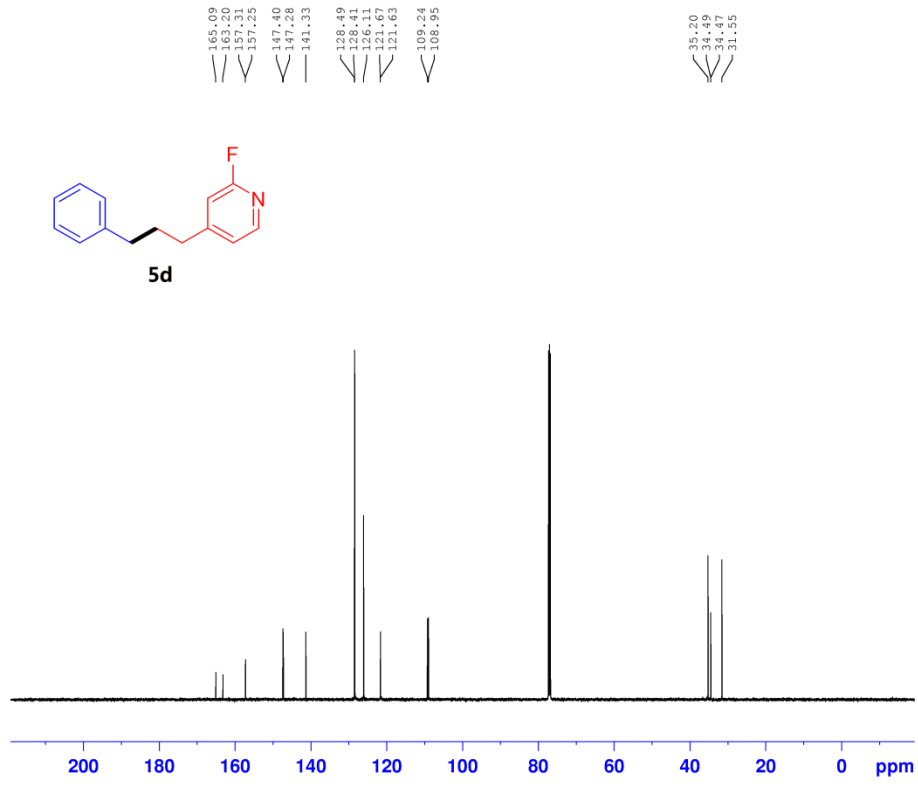

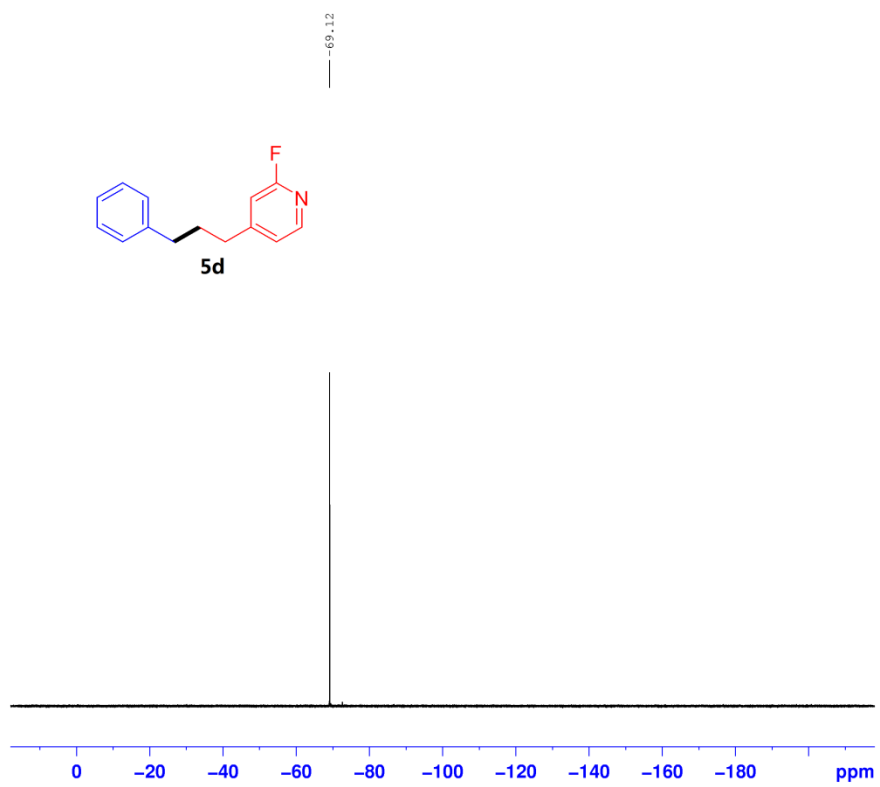

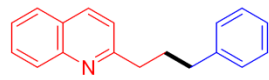

5f

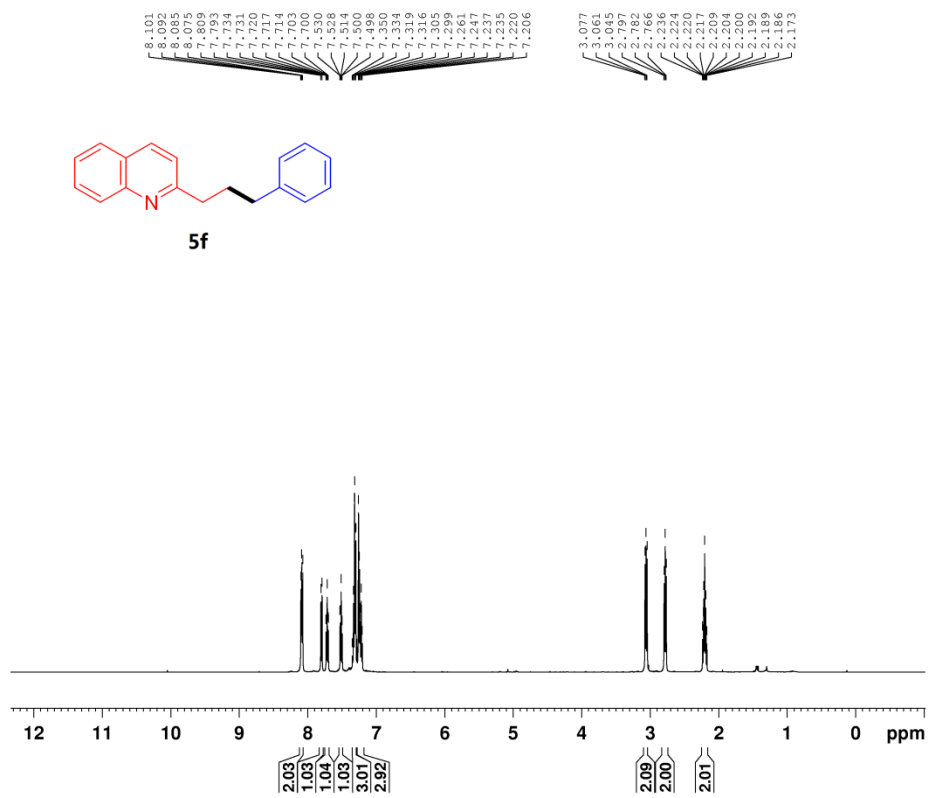

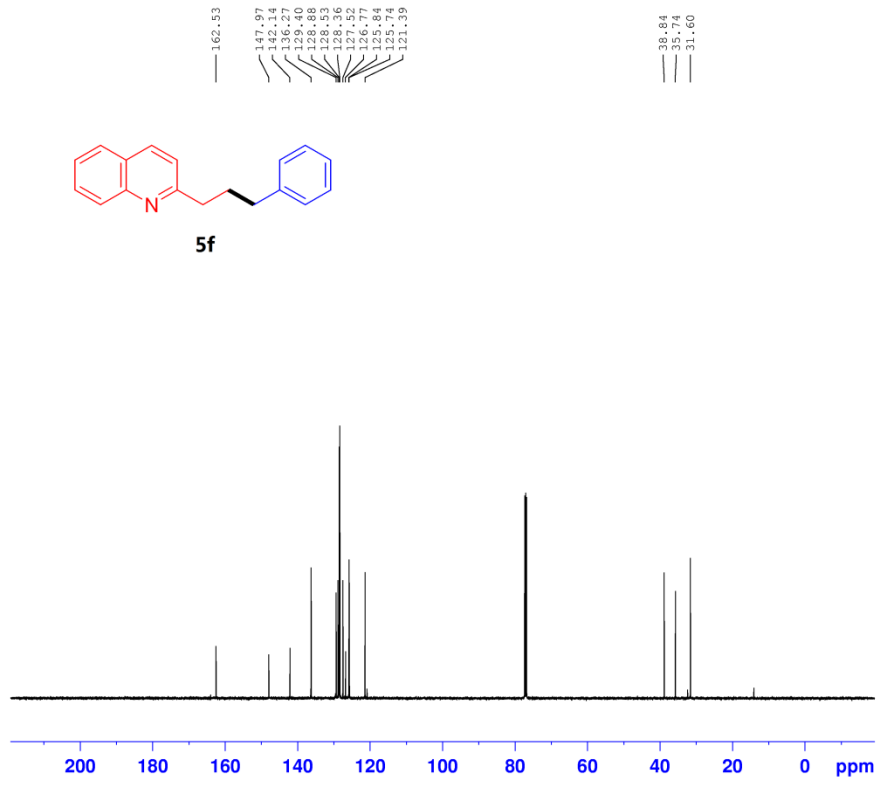

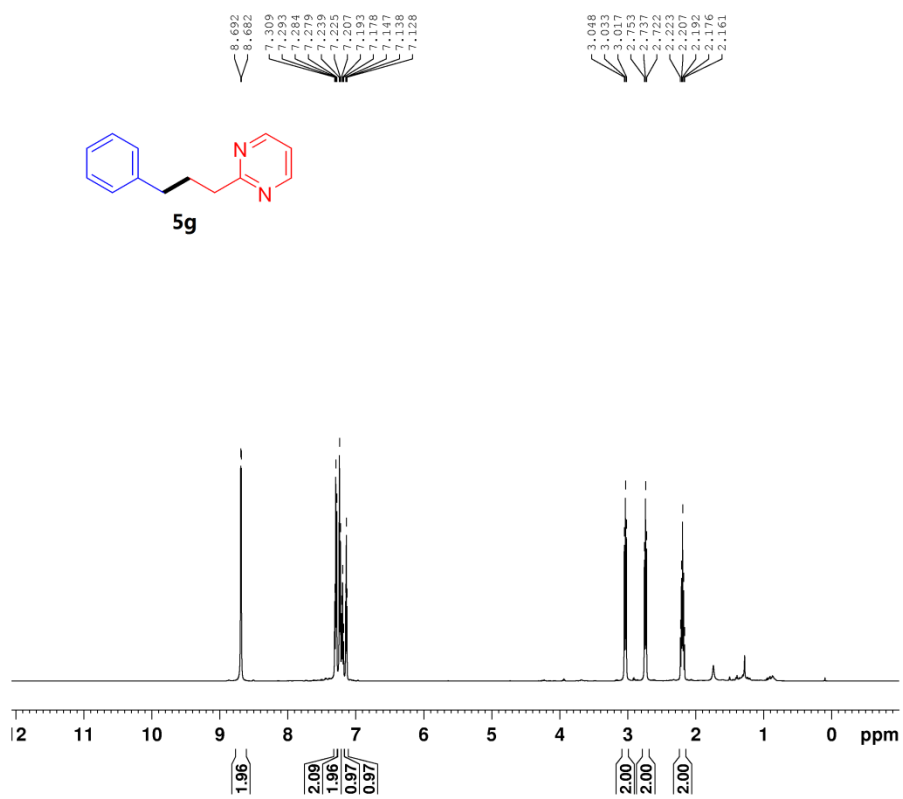



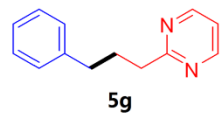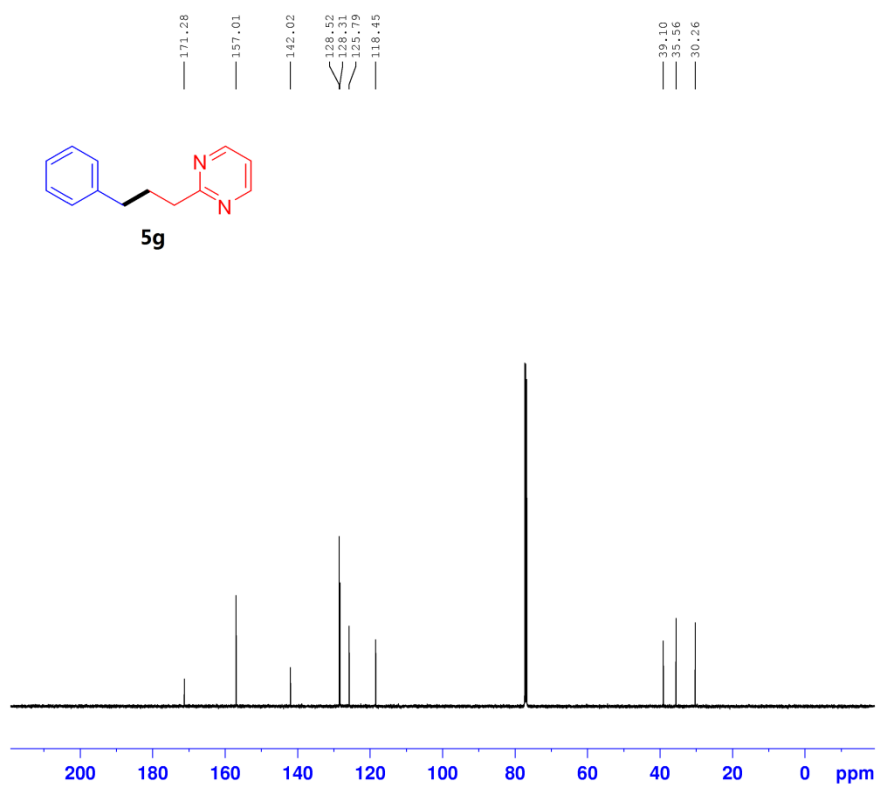

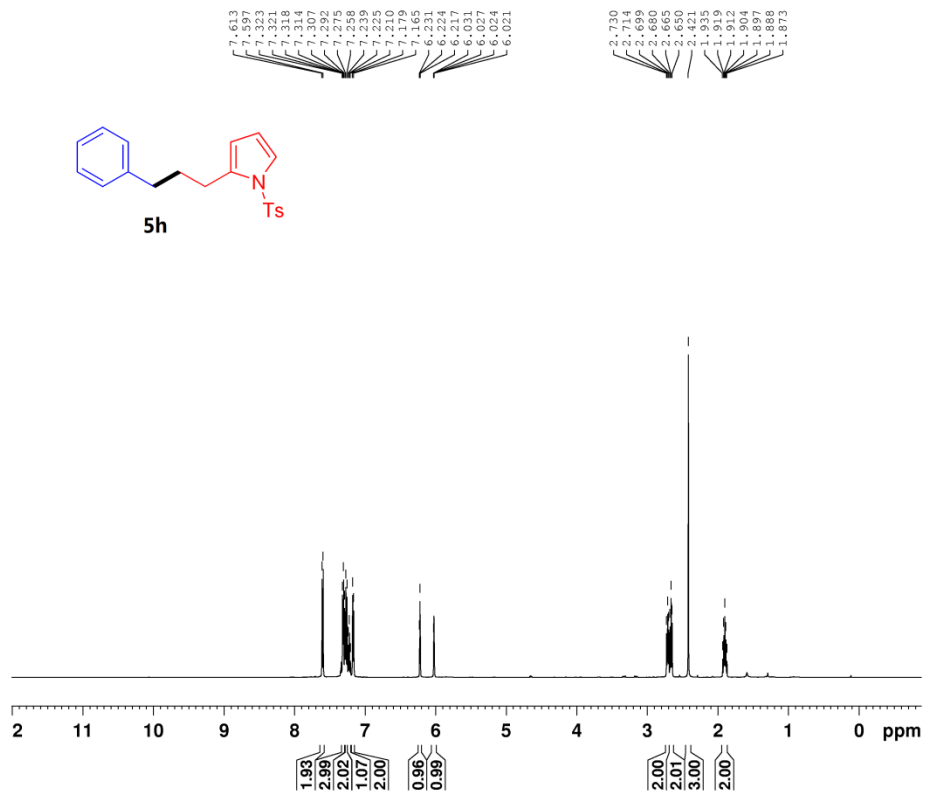

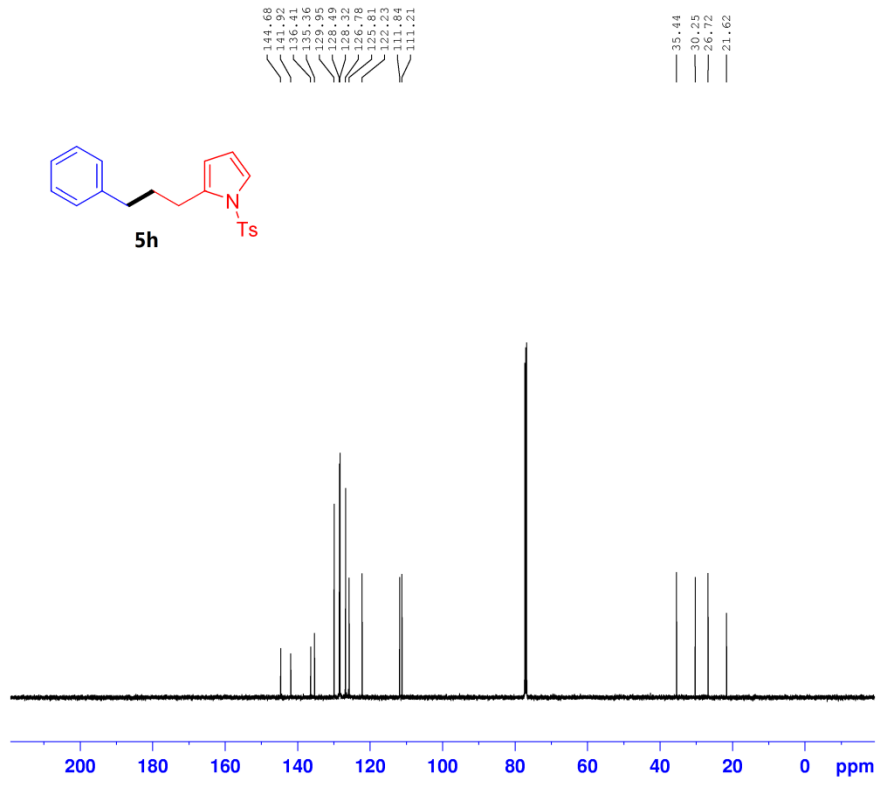

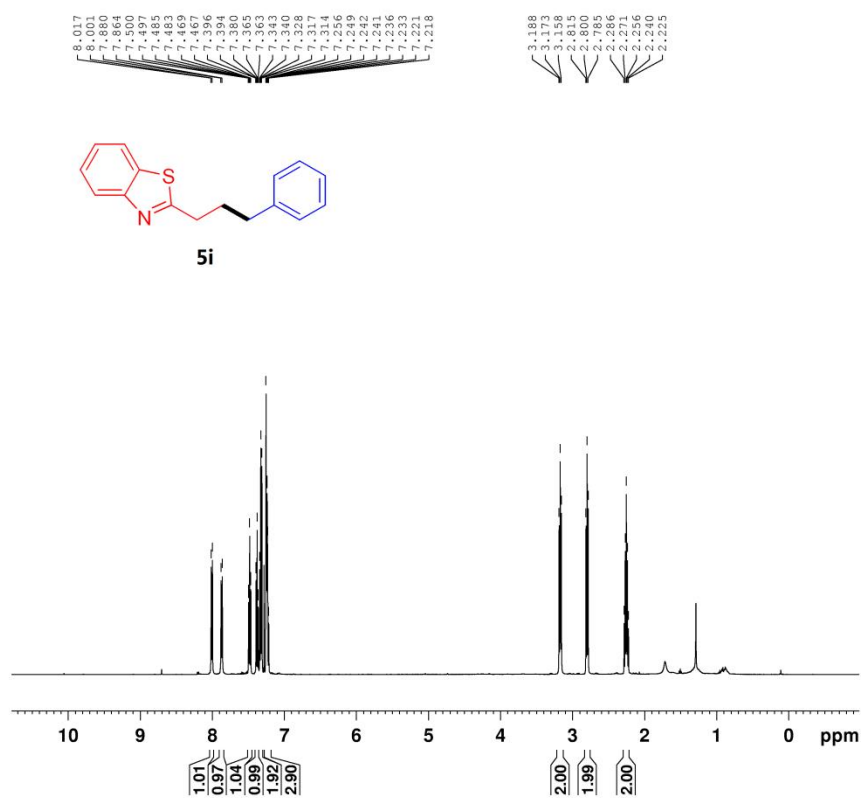

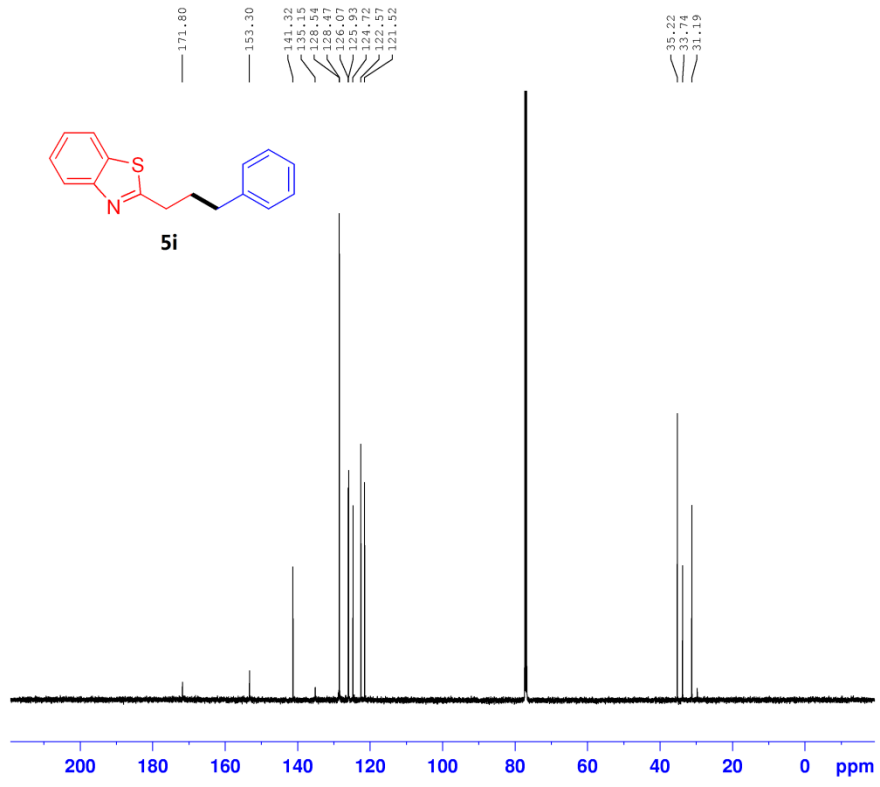

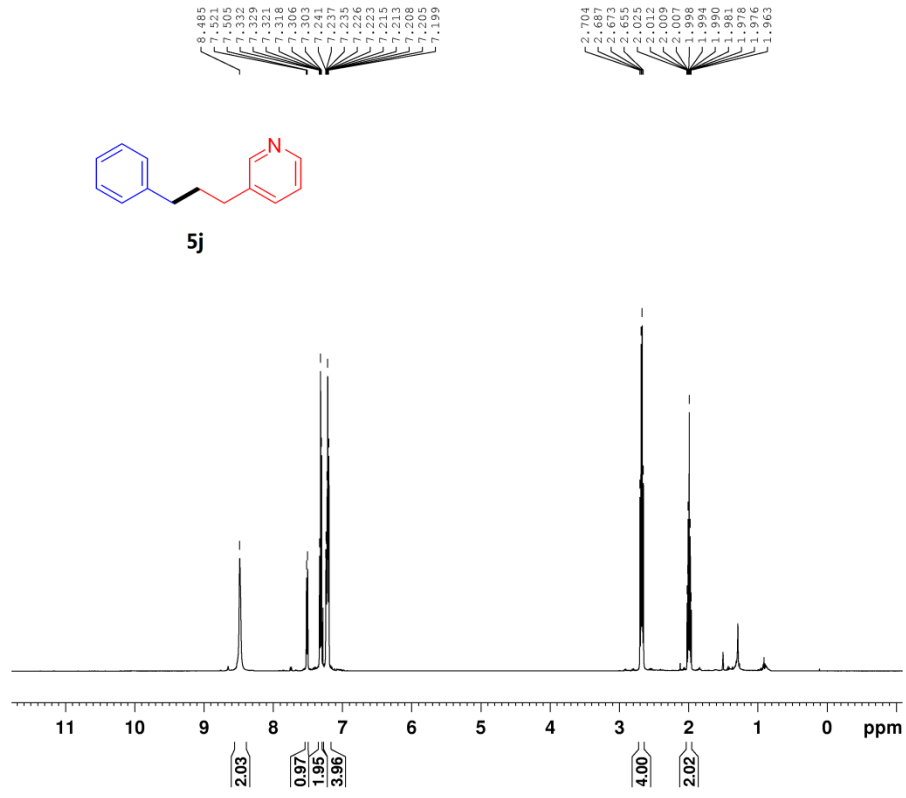

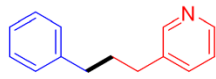

5j

150.01  
147.37  
141.73  
137.44  
135.80  
128.43  
125.95  
123.32

35.28  
32.60  
32.47

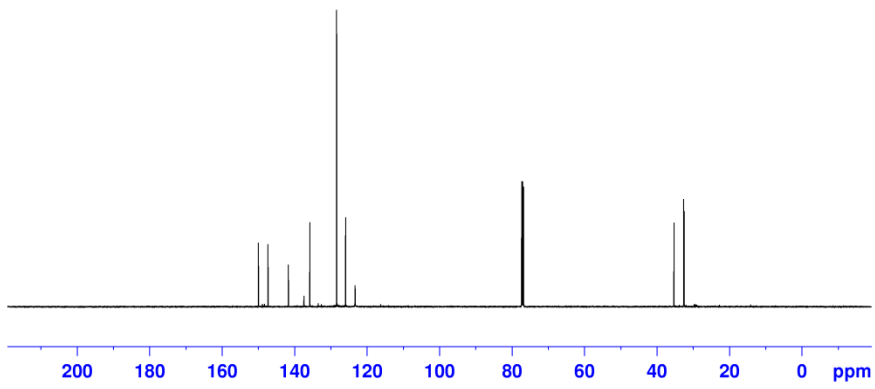

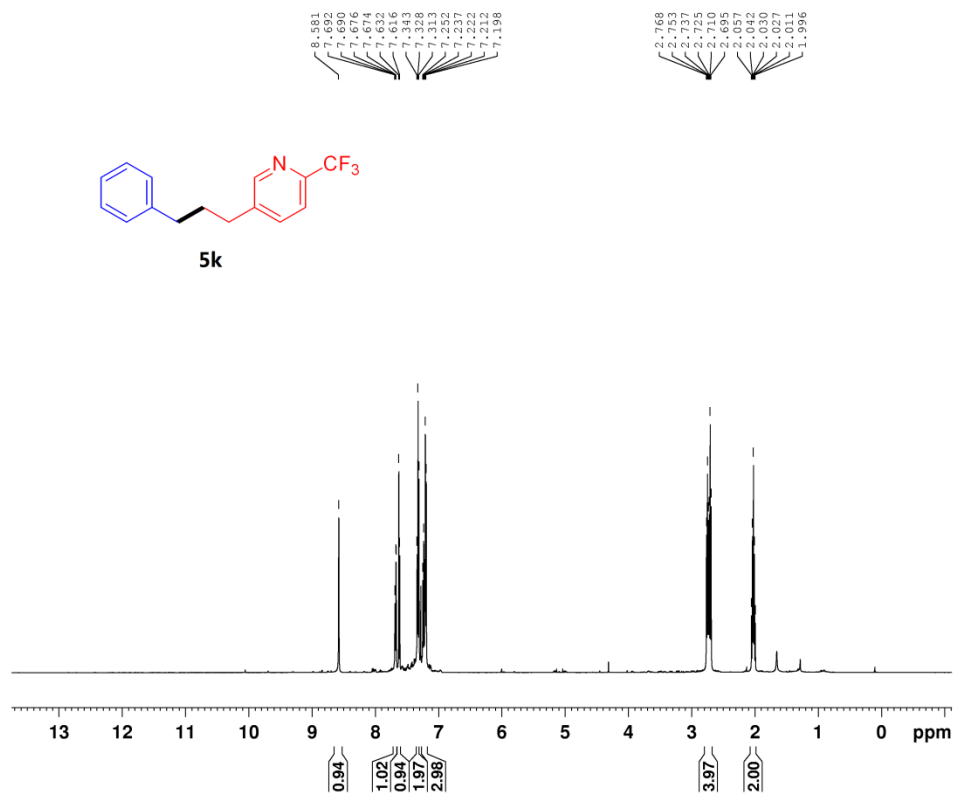



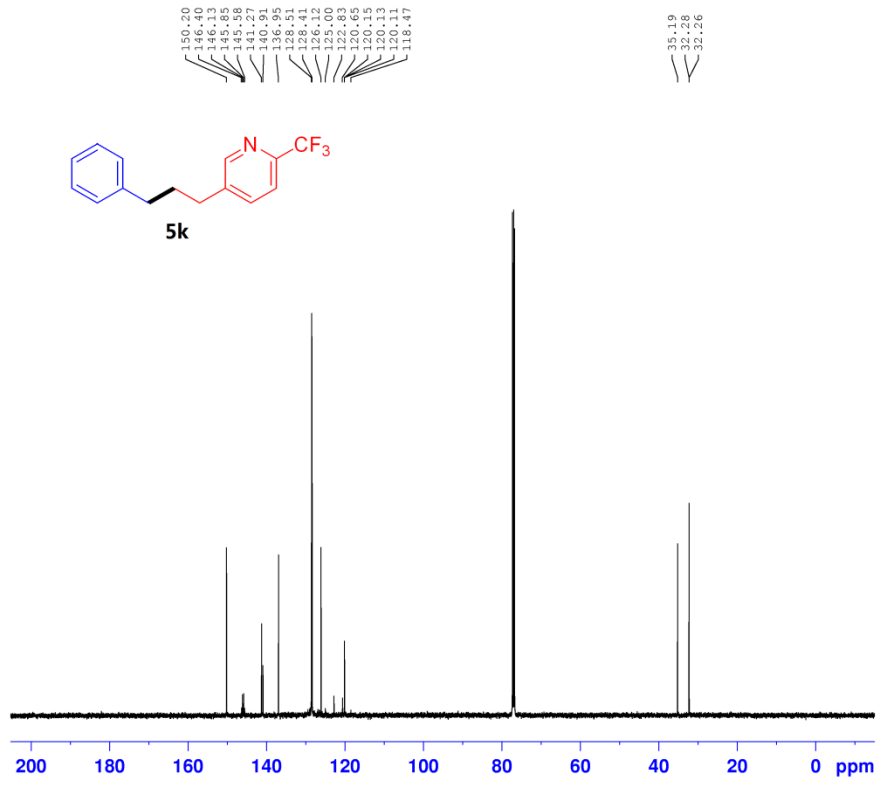

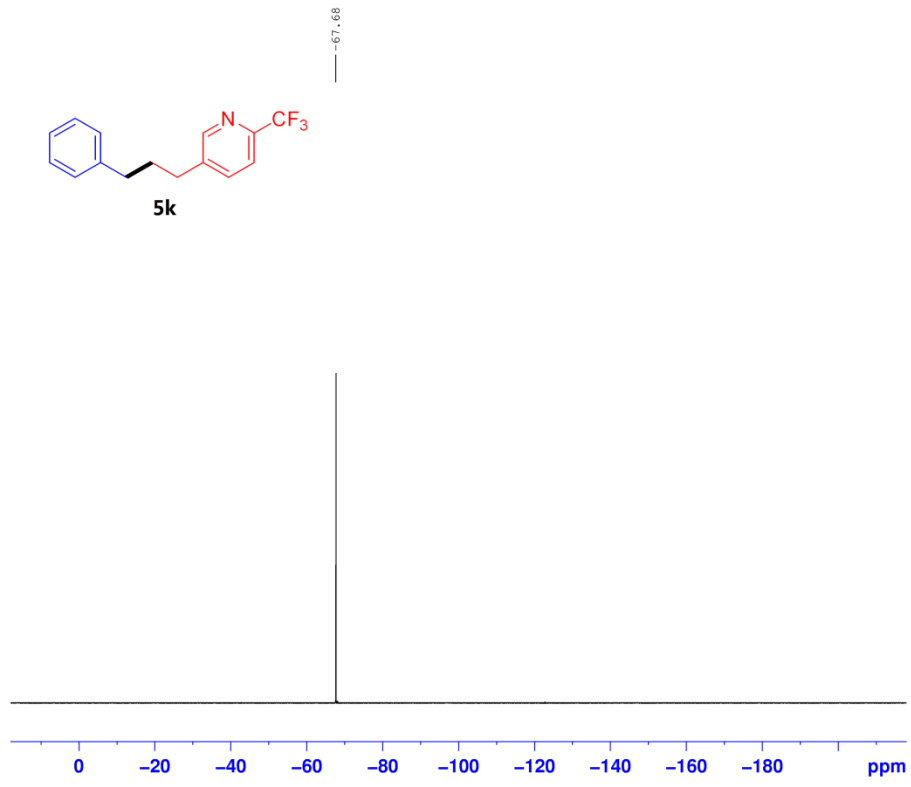

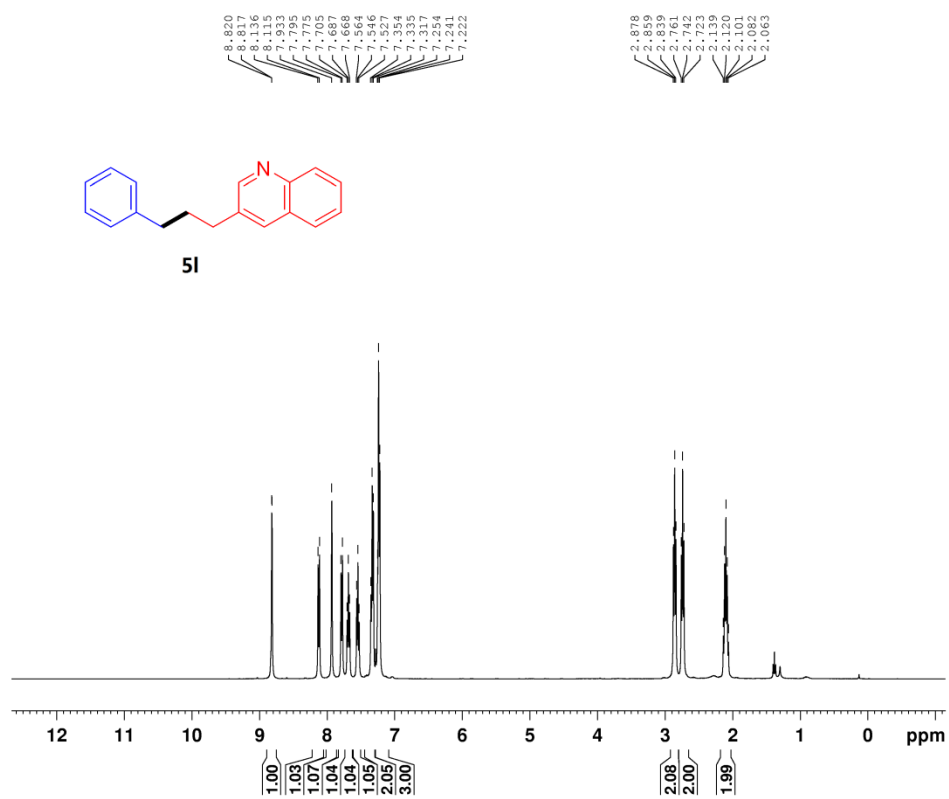

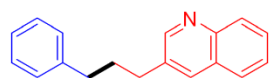

51

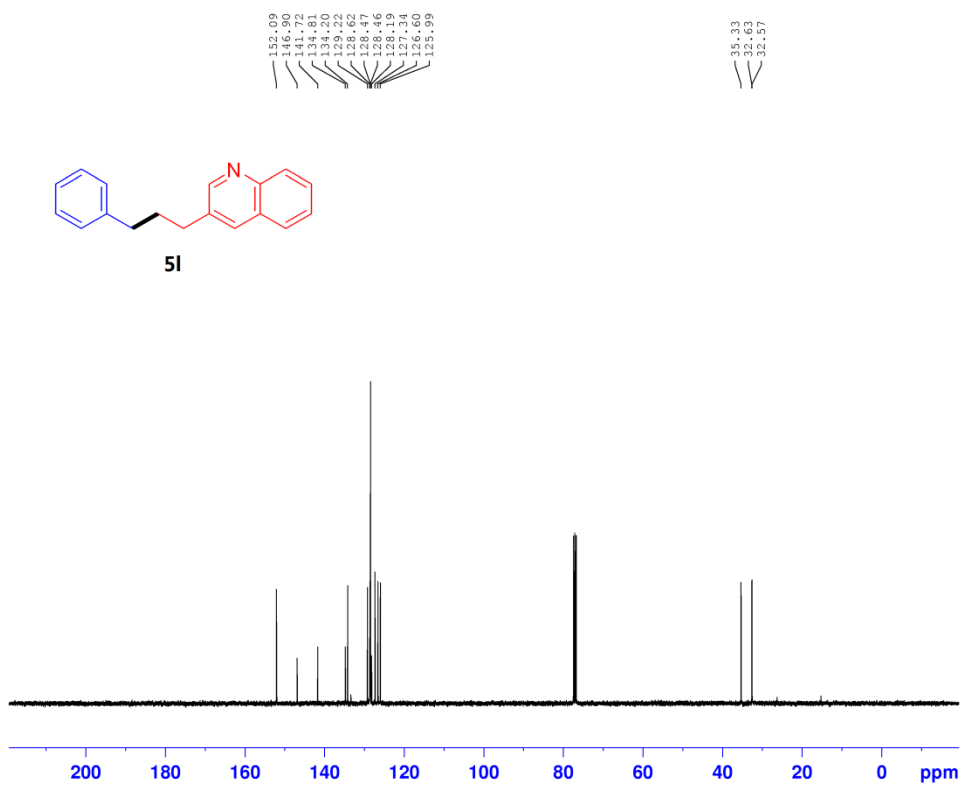

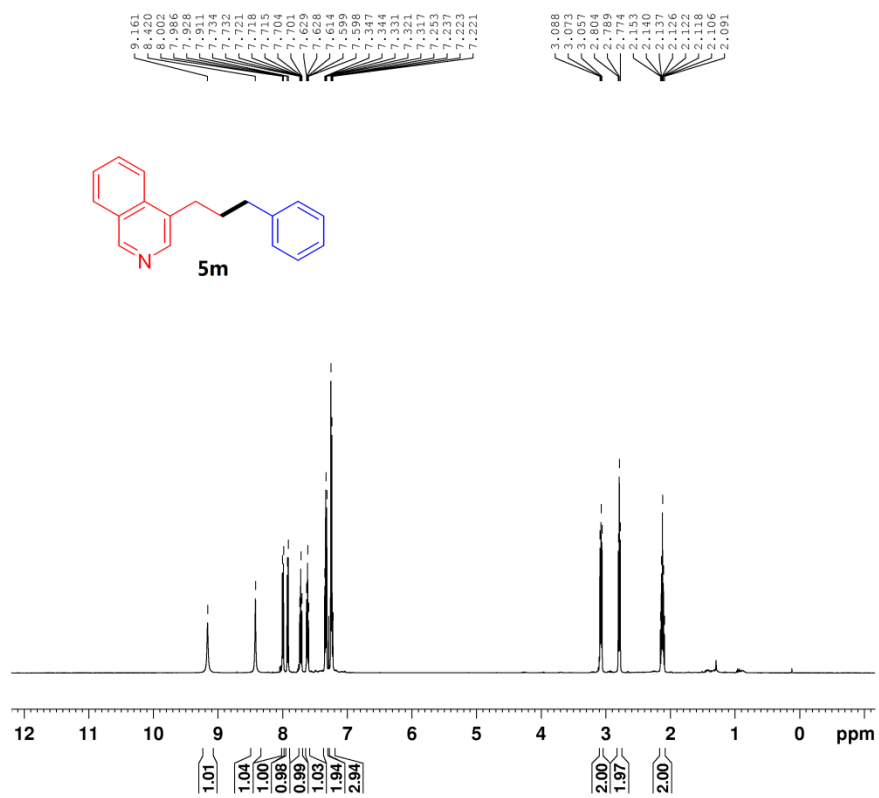

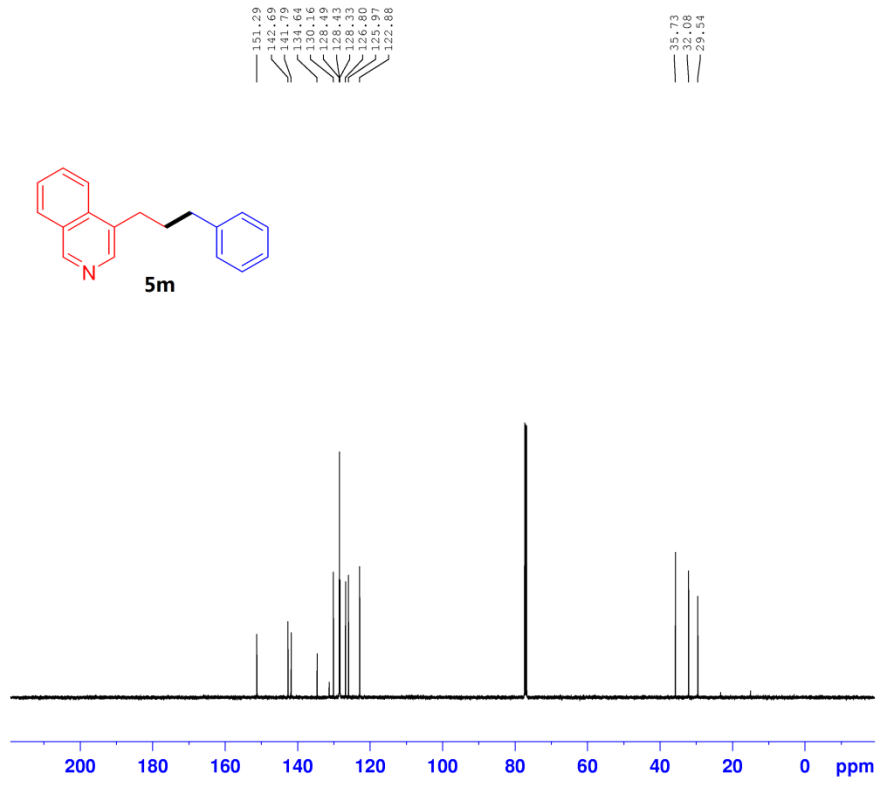

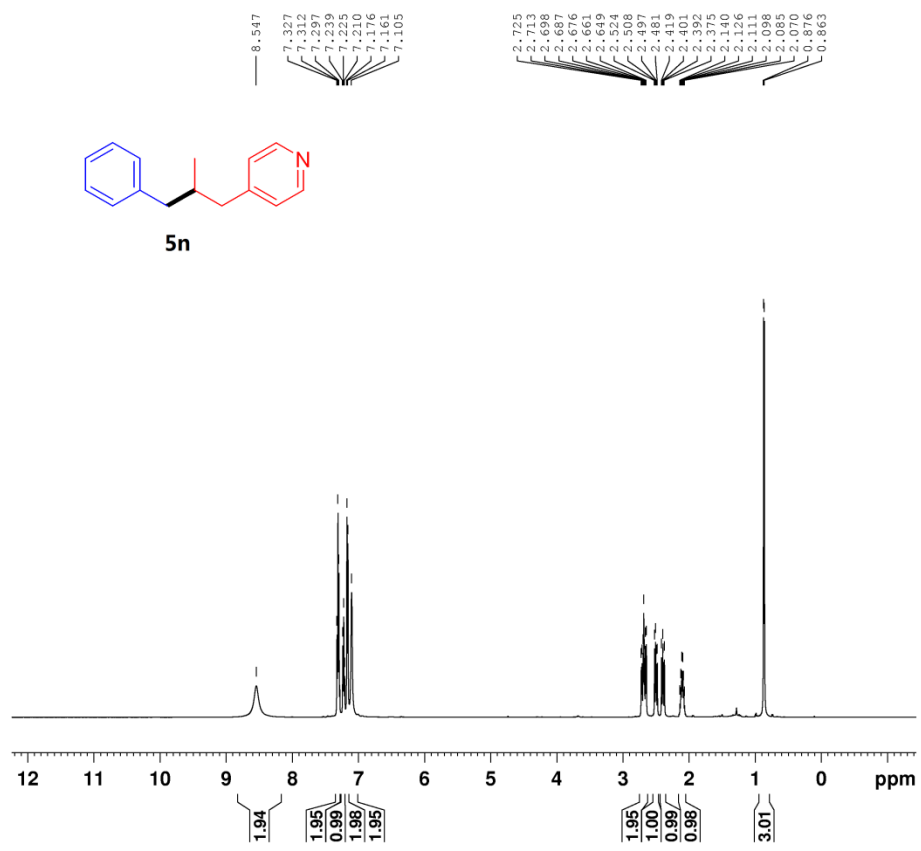

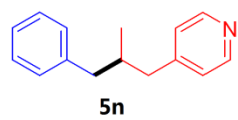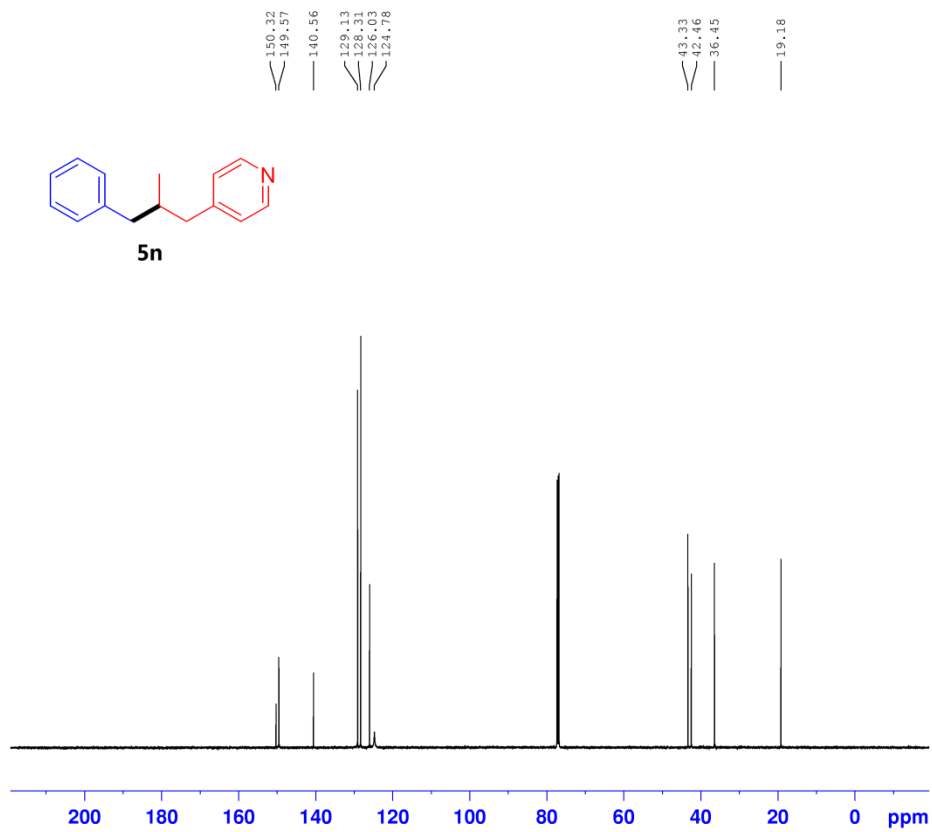



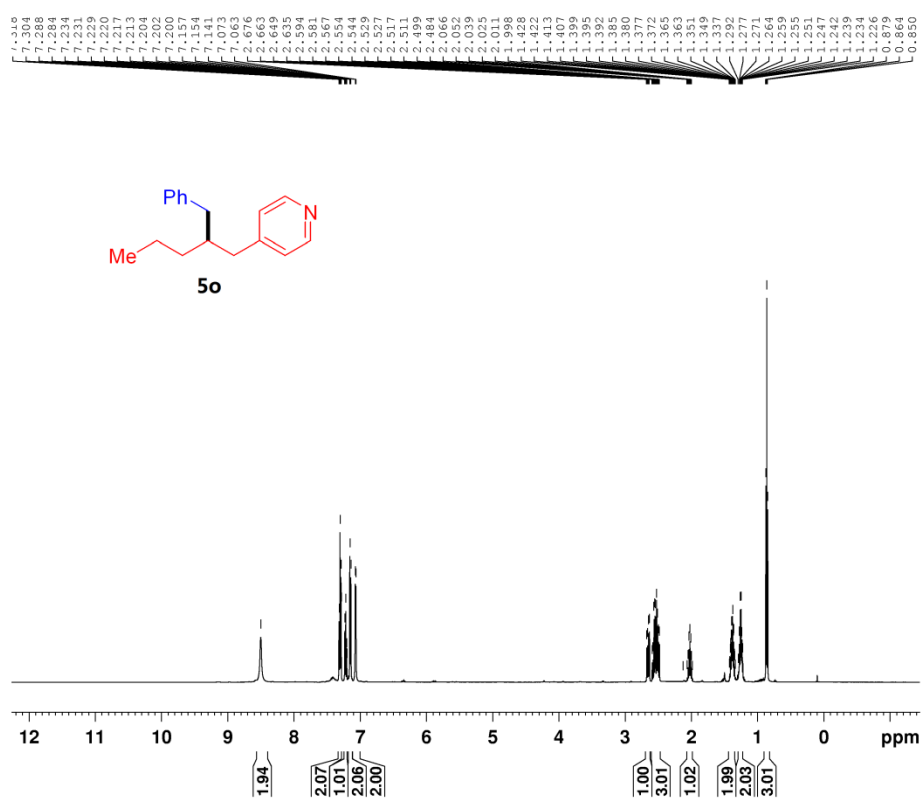

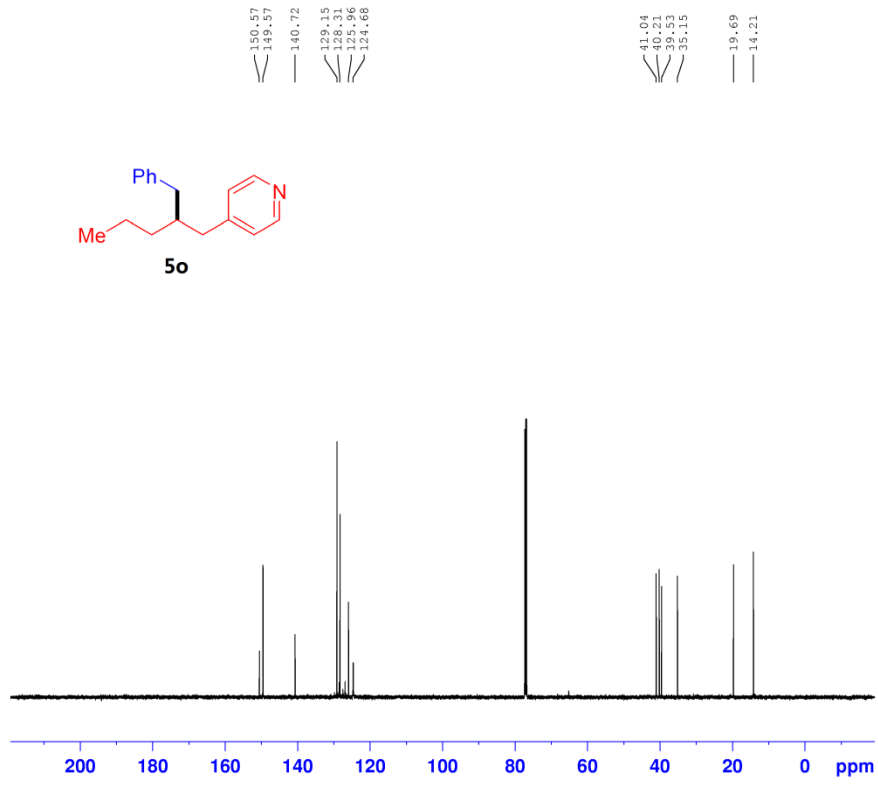

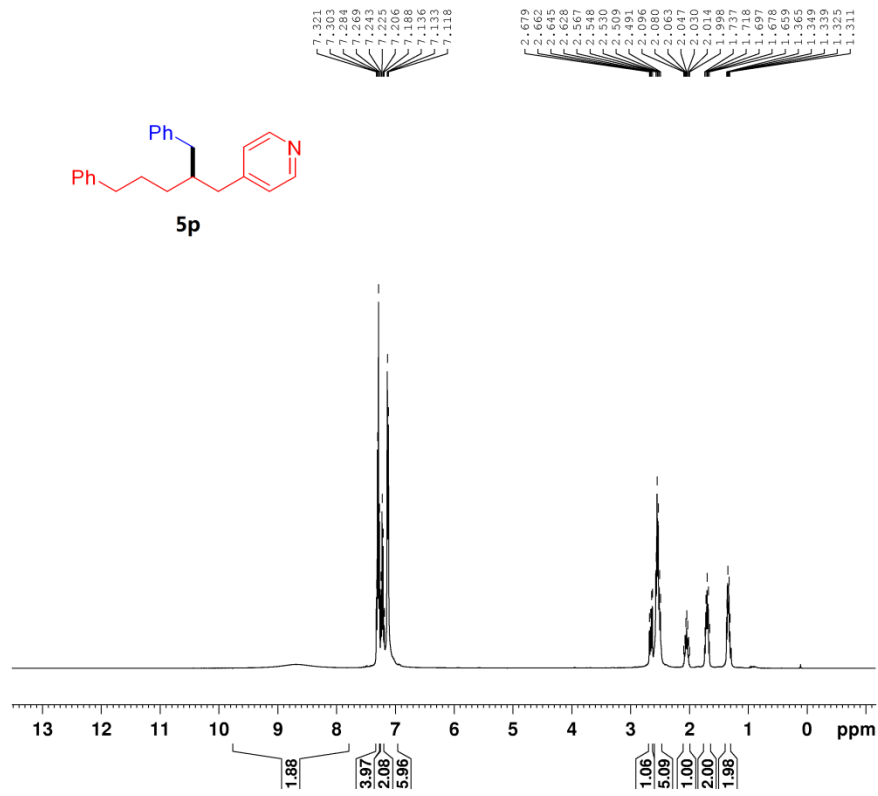

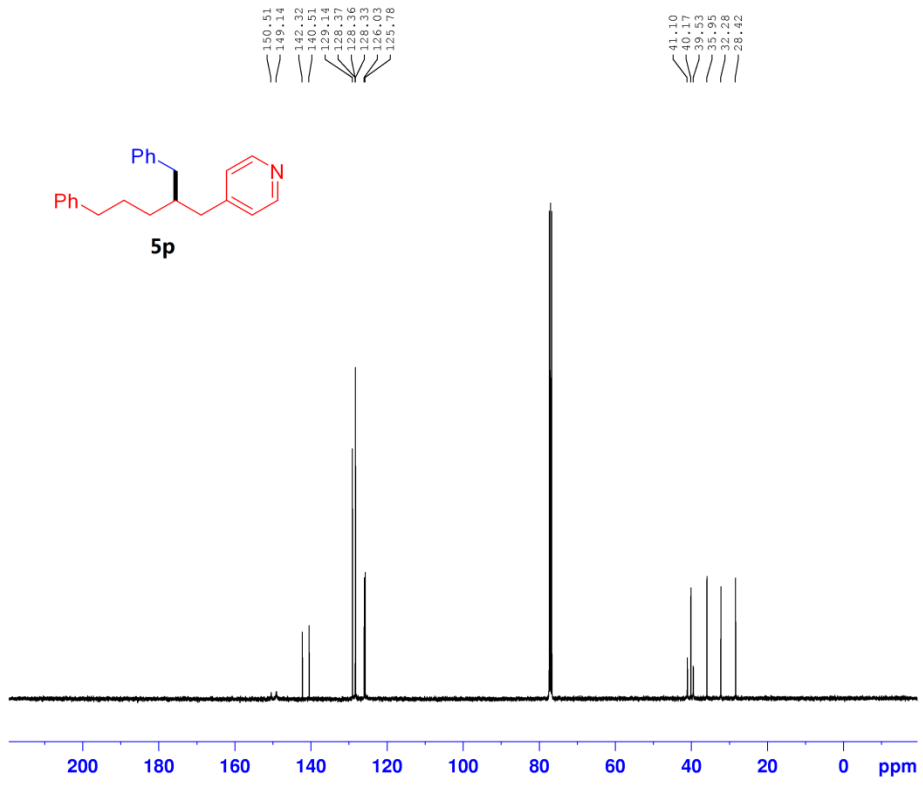

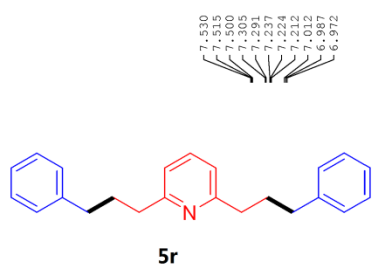

7.530  
 7.500  
 7.500  
 7.305  
 7.291  
 7.287  
 7.254  
 7.252  
 7.102  
 6.987  
 6.972

2.865  
 2.850  
 2.850  
 2.736  
 2.722  
 2.707  
 2.108  
 2.093  
 2.079

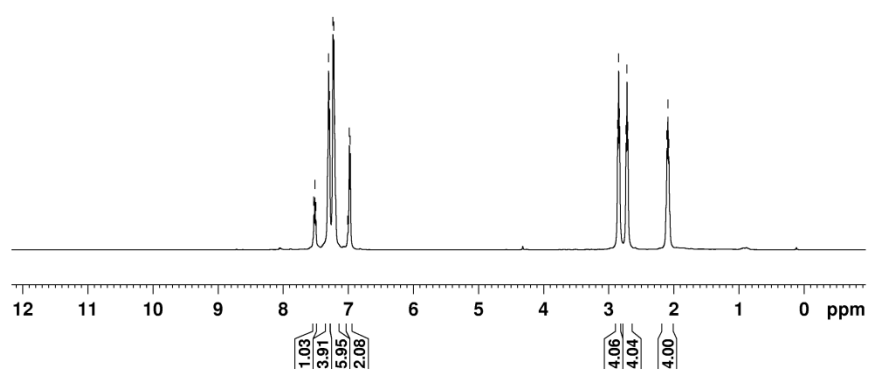

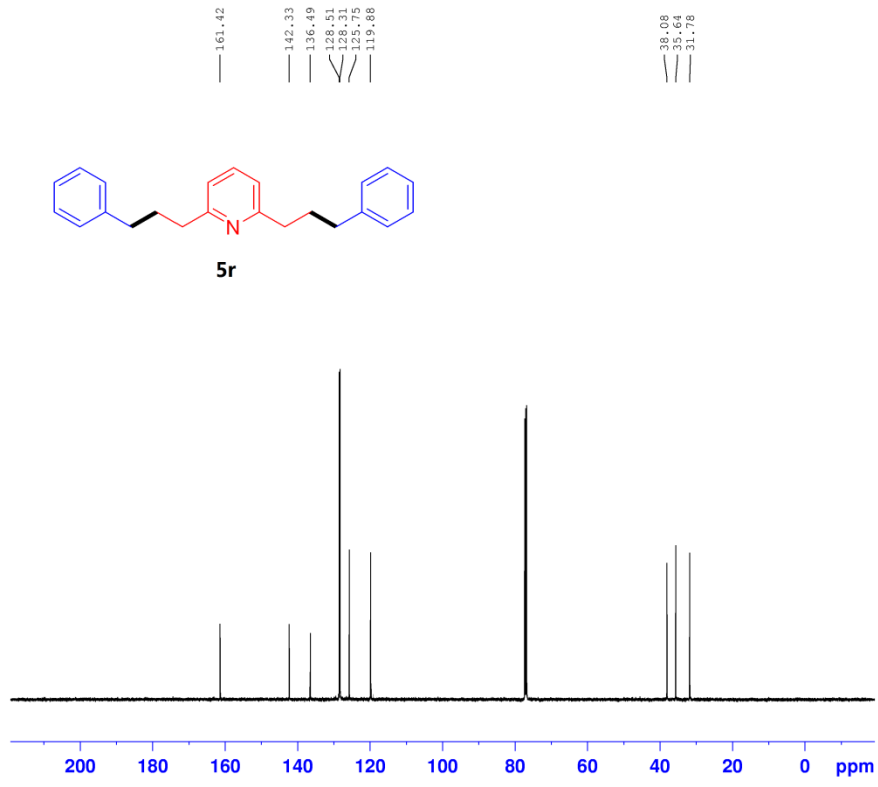

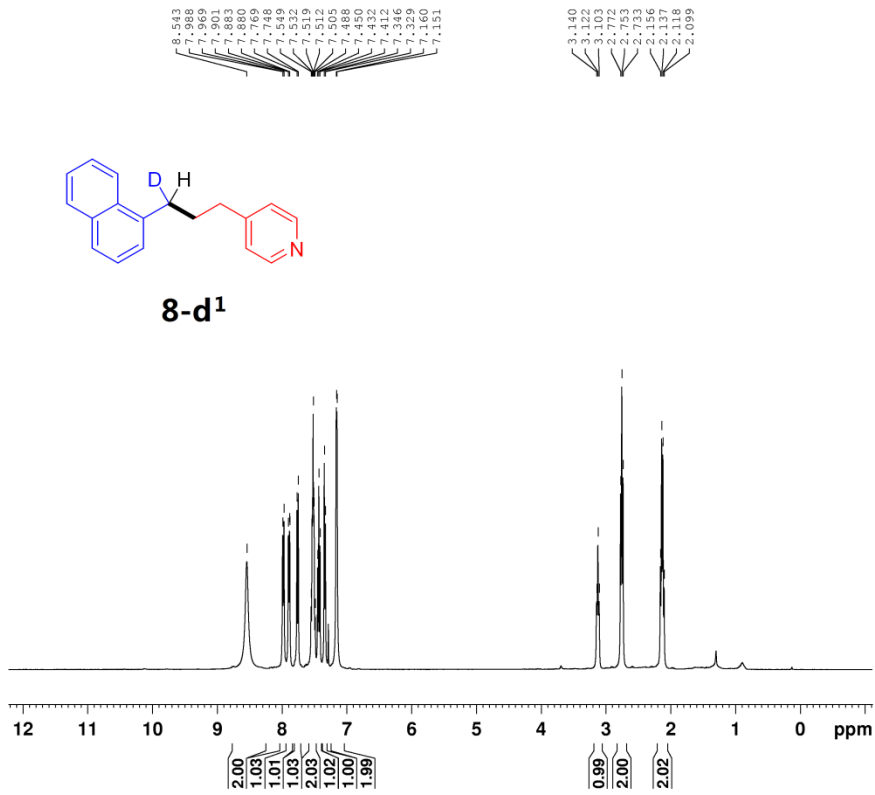

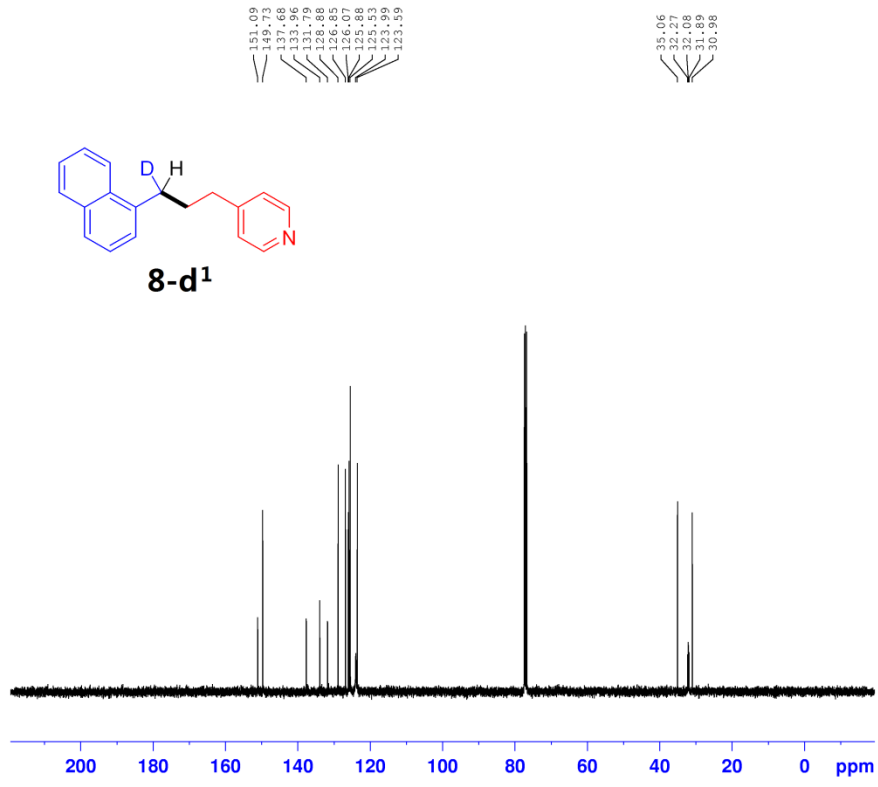



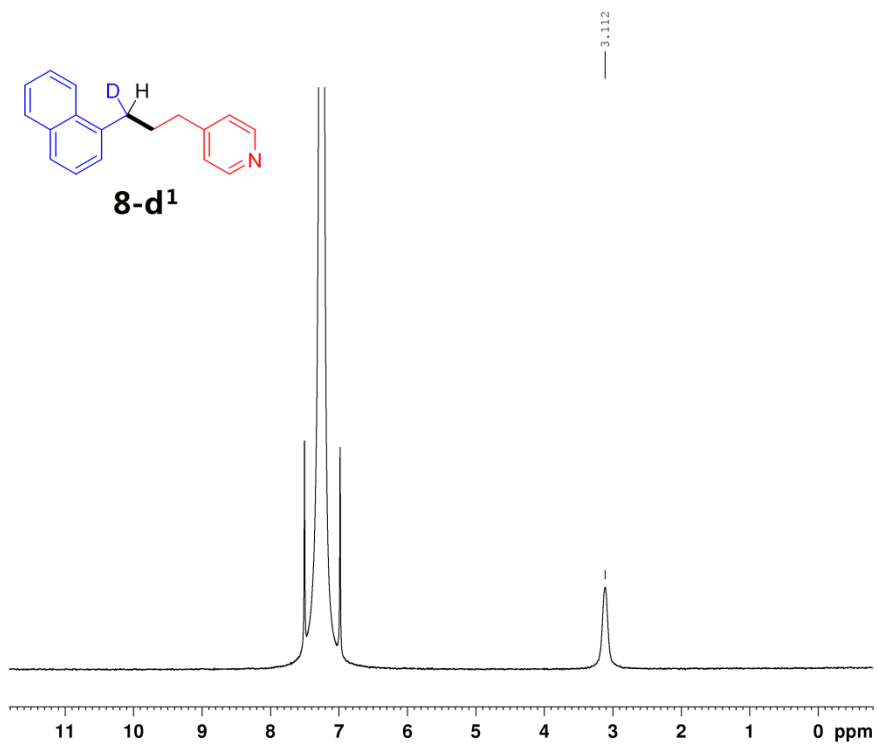

Supplement: SC-012-D0SC06586B-s001.pdf [file SC-012-D0SC06586B-s001.pdf]
